# Supplementary material for: Pyrazolo-fused 4-azafluorenones as key reagents for the synthesis of fluorescent dicyanovinylidene-substituted derivatives
Source: Royal Society of Chemistry journal article supplement (doi:10.1039/c9ra04682h), 2019-01-01
Supplement: c9ra04682h1.pdf [file c9ra04682h1.pdf]

## Supporting information

### Pyrazolofused 4-azafluorenones as key reagents for the synthesis of fluorescent dicyanovinylidene-substituted derivatives

Jessica Orrego-Hernández,<sup>a</sup> Carolina Lizarazo,<sup>a</sup> Justo Cobo,<sup>b</sup> and Jaime Portilla\*<sup>a</sup>

<sup>a</sup>*Bioorganic Compounds Research Group, Department of Chemistry, Universidad de los Andes, Carrera 1 No. 18A-10, Bogotá, Colombia*

<sup>b</sup>*Departamento de Química Orgánica e Inorgánica, Universidad de Jaén, 23071 Jaén, Spain*

\*E-mail: [jportill@uniandes.edu.co](mailto:jportill@uniandes.edu.co); Tel: +57 1 3394949. Ext. 2080

### Contents

|                                                                                   |     |
|-----------------------------------------------------------------------------------|-----|
| 1. Overview of Substrates, Intermediates and Products Numbering.....              | S2  |
| 2. Experimental procedures and characterization data.....                         | S4  |
| 3. Supplementary Analytical Data (Identification of intermediate <b>5a</b> )..... | S16 |
| 4. Photophysical studies.....                                                     | S17 |
| 5. Computational calculations.....                                                | S18 |
| 6. Fluorescent chemosensors <b>7a-d</b> for detection of cyanide.....             | S23 |
| 7. Copies of NMR spectra.....                                                     | S25 |
| 8. ORTEP Drawing for Structure <b>7b</b> .....                                    | S54 |
| 9. HRMS analysis data of the final products <b>7a-d</b> .....                     | S55 |
| 10. References.....                                                               | S60 |

# 1. Overview of Substrates Intermediates and Products Numbering

## 1.1. Substrates **1**, **2a-h**, **3a-e**, and intermediates **6h** and **5a**

Indan-1,3-dione **1**, 4-R-benzaldehydes **2a-h** and 3-alkyl-5-amino-1-aryl-1*H*-pyrazoles **3a-e**

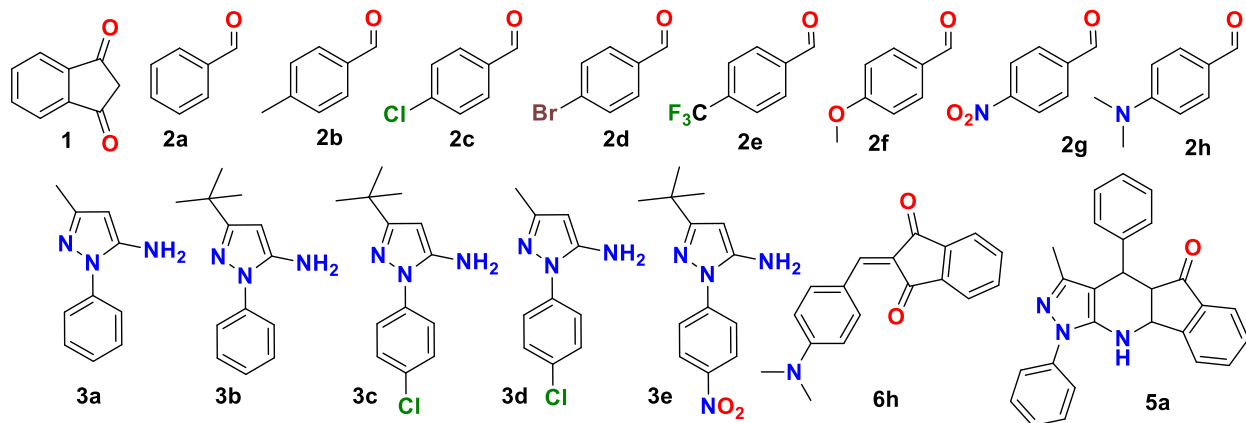

## 1.2. Products **4a-x** and final products **7a-d**

4-Aryl-3-methyl-1-phenylindeno[1,2-*b*]pyrazolo[4,3-*e*]pyridin-5(1*H*)-ones **4a-h** and 4-Aryl-3-(*tert*-butyl)-1-phenylindeno[1,2-*b*]pyrazolo[4,3-*e*]pyridin-5(1*H*)-ones **4i-o**.

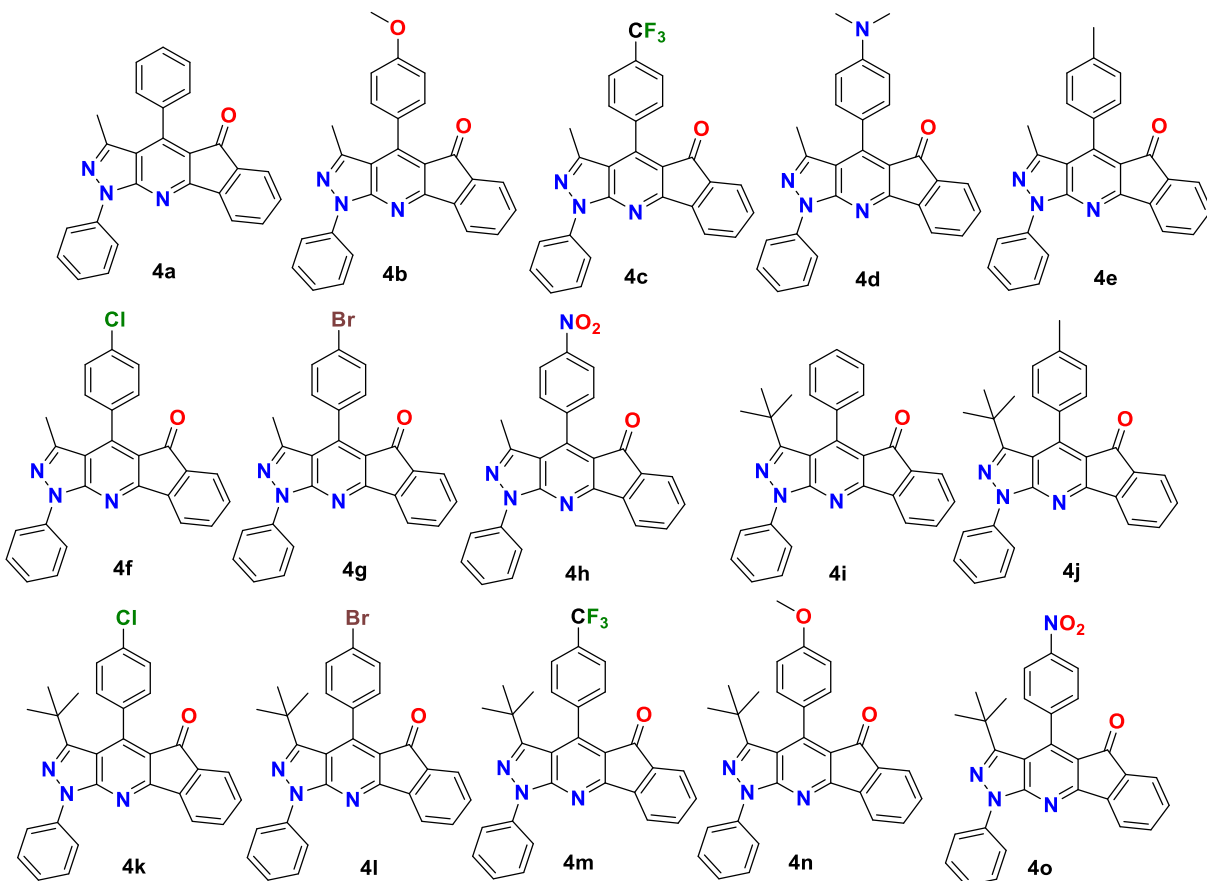

Aryl-3-(*tert*-butyl)-1-(4-chlorophenyl)indeno[1,2-*b*]pyrazolo[4,3-*e*]pyridin-5(1*H*)-ones **4p-v**, 1-(4-chlorophenyl)-3-methyl-4-phenylindeno[1,2-*b*]pyrazolo[4,3-*e*]pyridin-5(1*H*)-one **4w**, 3-(*tert*-butyl)-1-(4-nitrophenyl)-4-phenylindeno[1,2-*b*]pyrazolo[4,3-*e*]pyridin-5(1*H*)-one **4x**, and 2-(4-aryl-3-methyl-1-phenylindeno[1,2-*b*]pyrazolo[4,3-*e*]pyridin-5(1*H*)-ylidene)malononitrile **7a-d**.

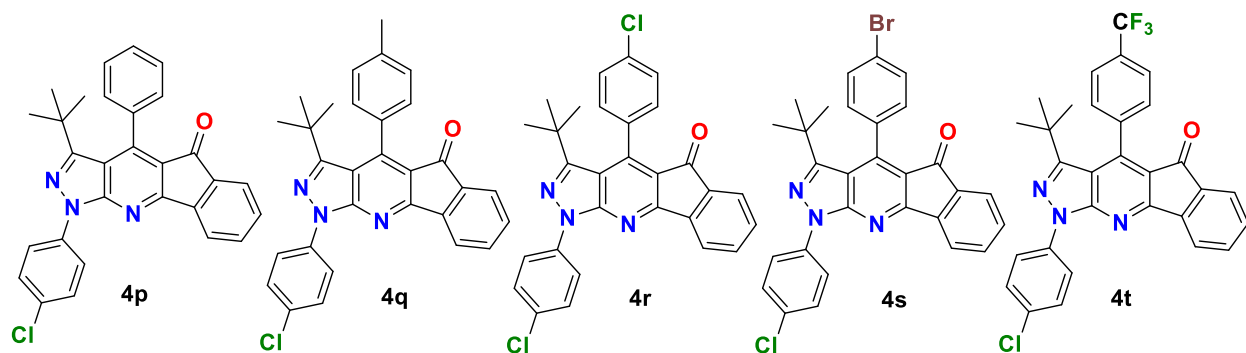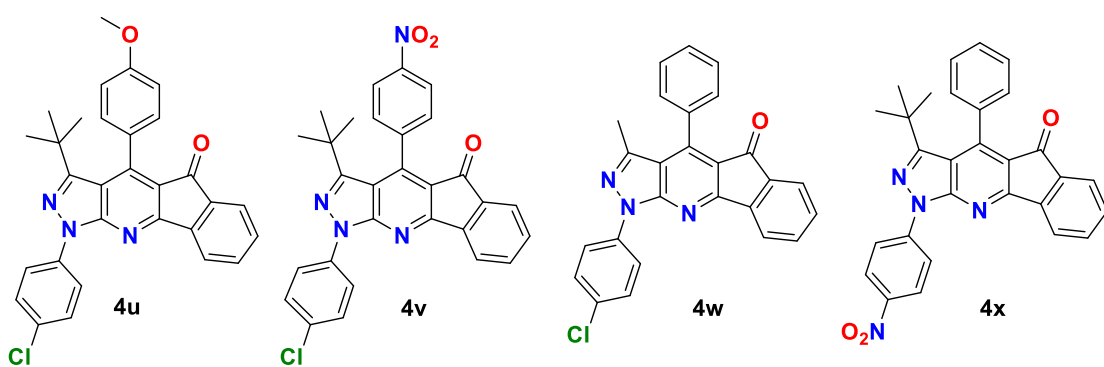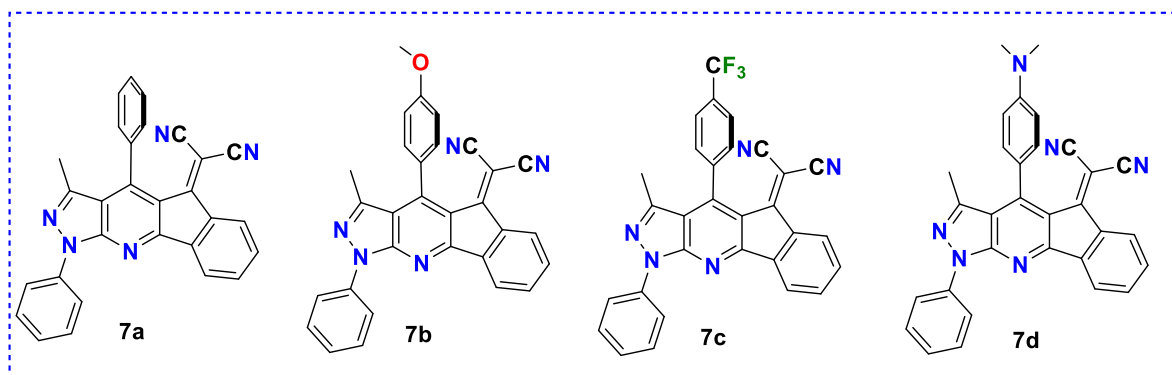

## 2. Experimental procedures and characterization data

*2.1. General information.* All reagents were purchased from commercial sources and used without further purification, unless otherwise noted. All starting materials were weighed and handled in air at room temperature. The reactions were monitored by TLC and were visualized by UV (254 nm). Column and Flash chromatography was performed on silica gel (230-400 mesh or 70-230 mesh, respectively). All reactions under microwave (MW) irradiation were performed using a sealed reaction vessel (10 mL, max pressure = 300 psi) containing a Teflon coated stirring bar (obtained from CEM). MW-assisted reactions were performed in a CEM Discover focused microwave ( $\nu = 2.45$  GHz) reactor, equipped with a built-in pressure measurement sensor, and with a vertically focused IR temperature sensor; controlled temperature, power, and time settings were used for all reactions. NMR spectra were recorded at 400 MHz ( $^1\text{H}$ ) and 100 MHz ( $^{13}\text{C}$ ) at 298 K using tetramethylsilane (0 ppm) as the internal reference. NMR spectroscopic data were recorded in  $\text{CDCl}_3$  and  $\text{DMSO-}d_6$  using as internal standards the residual non-deuterated signal for  $^1\text{H}$  NMR and the deuterated solvent signal for  $^{13}\text{C}$  NMR spectroscopy. DEPT spectra were used for the assignment of carbon signals. Chemical shifts ( $\delta$ ) are given in ppm and coupling constants ( $J$ ) are given in Hz. The following abbreviations are used for multiplicities: s = singlet, d = doublet, t = triplet, and m = multiplet. Melting points were collected using a Stuart SMP10 melting point apparatus, and the acquired data are uncorrected. The mass spectra were recorded on a Hewlett Packard HP Engine-5989 spectrometer (equipped with a direct inlet probe) and operating at 70 eV, and the High Resolution Mass Spectra (HRMS) by electron impact were recorded on a Micromass AutoSpec-Ultima, magnetic sector mass spectrometer at 70 eV. HPLC-HRMS data were obtained on an Agilent Technologies Q-TOF 6520 spectrometer via an electrospray ionization (ESI, 4000 V). X-ray diffraction intensities were collected on a Bruker D8 Venture diffractometer. Crystallographic data were recorded on a diffractometer using graphite-monochromated Mo  $K\alpha$  radiation ( $\lambda = 0.71073$  Å). Structures were solved using an interactive algorithm,<sup>1</sup> subsequently completed by a difference Fourier map, and refined using the program SHELXL2014<sup>2</sup> and the graphic material was prepared using the Mercury 3.10 software.<sup>3</sup> The electronic absorption spectra were measured on Varian Cary 100 Conc (Agilent Technologies) spectrophotometer in a quartz cuvette having a path length of 1 cm. The fluorescence emission spectra were recorded by using a CARY Eclipse (Agilent Technologies) fluorescence spectrophotometer in a quartz cell (1 cm path length). UV-vis and fluorescence measurements

were performed at room temperature (20 °C). For fluorescence measurements, both the excitation and emission slit widths were 5 nm.

## 2.2. Synthesis and characterization

2.2.1. *General Procedure for the synthesis of 3-alkyl-1,4-bis(aryl)indeno[1,2-*b*]pyrazolo[4,3-*e*]pyridin-5(1*H*)-ones 4a-x and 2-(4-dimethylaminobenzylidene)indene-1,3(2*H*)-dione (6h).* A mixture of equimolar quantities (0.25 mmol of each component) of indan-1,3-dione (**1**, **1**, 37 mg), 4-*R*-benzaldehyde **2**, and 3-alkyl-5-amino-1*H*-pyrazole **3** in water:triethylamine (0.7 ml, 15:1 v/v) was placed in a reaction tube of a CEM Discover, containing a magnetic stirring bar. The tube was sealed with a plastic MW septum and was irradiated at 80 °C (100 W, monitored by an IR temperature sensor) and maintained at this temperature for 10-25 min. The reaction mixture was cooled to 50 °C by airflow and then was partitioned between dichloromethane and water. The organic layer was washed with water and dried over anhydrous sodium sulfate. Subsequently, solvent was removed by rotary evaporation under reduced pressure and the residue was purified by flash chromatography on silica gel (eluent: CH<sub>2</sub>Cl<sub>2</sub>) to give the expected indenopyrazolopyridin-5-ones **4a-x** and the intermediate **6h**.

*3-Methyl-1,4-diphenylindeno[1,2-*b*]pyrazolo[4,3-*e*]pyridin-5(1*H*)-one (4a).* By following the general procedure for 15 min, **4a** was obtained as yellow crystals (81.3 mg, 84%). Mp 225-227 °C (Lit.<sup>4</sup> 220-221 °C). <sup>1</sup>H NMR (CDCl<sub>3</sub>): δ = 2.05 (s, 3H), 7.35 (t, *J* = 7.5 Hz, 1H), 7.40-7.47 (m, 3H), 7.50-7.62 (m, 7H), 7.96 (d, *J* = 7.4 Hz, 1H), 8.31 (d, *J* = 8.7 Hz, 2H); <sup>13</sup>C NMR (CDCl<sub>3</sub>): δ = 14.8 (CH<sub>3</sub>), 115.6 (C), 120.0 (C), 121.4 (CH), 121.5 (CH), 123.4 (CH), 126.3 (CH), 128.0 (CH), 128.6 (CH), 129.0 (CH), 129.2 (CH), 131.4 (CH), 132.8 (C), 134.6 (CH), 137.4 (C), 139.0 (C), 142.4 (C), 145.8 (C), 145.9 (C), 152.8 (C), 165.1 (C), 189.9 (C); MS (EI) *m/z* 387 (M<sup>+</sup>, 100%), 386 (45), 372 (5), 345 (5). HRMS (IE) *m/z* calcd. for C<sub>26</sub>H<sub>17</sub>N<sub>3</sub>O [M]<sup>+</sup>: 387.1372; found 387.1366.

*4-(4-Methoxyphenyl)-3-methyl-1-phenylindeno[1,2-*b*]pyrazolo[4,3-*e*]pyridin-5(1*H*)-one (4b).* By following the general procedure for 15 min, **4b** was obtained as yellow crystals (77.3 mg, 74%). Mp 244-246 °C (Lit.<sup>4</sup> 224-225 °C). <sup>1</sup>H NMR (CDCl<sub>3</sub>): δ = 2.12 (s, 3H), 3.91 (s, 3H), 7.06 (d, *J* = 8.9 Hz, 2H), 7.34 (t, *J* = 7.4 Hz, 1H), 7.41 (m, 3H), 7.52-7.62 (m, 4H), 7.95 (d, *J* = 7.5 Hz, 1H), 8.31 (d, *J* = 8.8 Hz, 2H); <sup>13</sup>C NMR (CDCl<sub>3</sub>): δ = 15.2 (CH<sub>3</sub>), 55.3 (CH<sub>3</sub>), 113.4 (CH), 115.8 (C), 120.0 (C), 121.4 (CH), 121.6 (CH), 123.4 (CH), 124.6 (C), 129.0 (CH), 130.5 (CH), 131.4 (CH),

134.6 (CH), 137.4 (C), 139.0 (C), 142.4 (C), 146.0 (C), 146.1 (C), 152.8 (C), 160.5 (C), 165.2 (C), 190.0 (C); MS (EI) m/z 417 (M<sup>+</sup>, 100%), 402 (4), 386 (15). HRMS (IE) m/z calcd. for C<sub>27</sub>H<sub>19</sub>N<sub>3</sub>O<sub>2</sub> [M]<sup>+</sup>: 417.1477; found 417.1476.

*3-Methyl-1-phenyl-4-(4-(trifluoromethyl)phenyl)indeno[1,2-b]pyrazolo[4,3-e]pyridin-5(1H)-one (4c)*. By following the general procedure for 10 min, **4c** was obtained as white powder (104.8 mg, 92%). Mp 265-267 °C (Lit.<sup>4</sup> 280-281 °C). <sup>1</sup>H NMR (CDCl<sub>3</sub>): δ = 2.05 (s, 3H), 7.37 (t, *J* = 7.4 Hz, 1H), 7.45 (t, *J* = 7.4 Hz, 1H), 7.54-7.63 (m, 6H), 7.80 (d, *J* = 8.1 Hz, 2H), 7.99 (d, *J* = 7.3 Hz, 1H), 8.30 (d, *J* = 8.6 Hz, 2H); <sup>13</sup>C NMR (CDCl<sub>3</sub>): δ = 14.9 (CH<sub>3</sub>), 115.1 (C), 119.9, 122.7, 125.4, 128.1 (CF<sub>3</sub>, q, *J* = 367.5 Hz), 120.0 (C), 121.6 (CH), 121.7 (CH), 123.6 (CH), 125.1 (CH, q, *J* = 3.7 Hz), 126.6 (CH), 129.1 (CH), 129.2 (CH), 130.8, 131.2, 131.5, 131.8 (C-CF<sub>3</sub>, q, *J* = 33.7 Hz), 131.7 (CH), 135.0 (CH), 136.6 (C), 137.3 (C), 138.8 (C), 143.8 (C), 145.5 (C), 152.8 (C), 165.0 (C), 189.8 (C); MS (EI) m/z 455 (M<sup>+</sup>, 100%), 440 (6), 413 (6), 386 (5). HRMS (IE) m/z calcd. for C<sub>27</sub>H<sub>16</sub>F<sub>3</sub>N<sub>3</sub>O [M]<sup>+</sup>: 455.1245; found 455.1241.

*4-(4-(Dimethylamino)phenyl)-3-methyl-1-phenylindeno[1,2-b]pyrazolo[4,3-e]pyridin-5(1H)-one (4d)*. By following the general procedure for 25 min, **4d** was obtained as orange crystals (90.4 mg, 84%). Mp 223-225 °C (Lit.<sup>4</sup> 242-244 °C). <sup>1</sup>H NMR (CDCl<sub>3</sub>): δ = 2.22 (s, 3H), 3.07 (s, 6H), 6.83 (d, *J* = 8.9 Hz, 2H), 7.33 (t, *J* = 7.5 Hz, 1H), 7.40 (m, 3H), 7.55 (m, 3H), 7.62 (d, *J* = 7.4 Hz, 1H), 7.95 (d, *J* = 7.4 Hz, 1H), 8.32 (d, *J* = 8.7 Hz, 2H); <sup>13</sup>C NMR (CDCl<sub>3</sub>): δ = 15.6 (CH<sub>3</sub>), 40.3 (CH<sub>3</sub>), 111.0 (CH), 115.8 (C), 119.4 (C), 119.8 (C), 121.2 (CH), 121.6 (CH), 123.3 (CH), 126.2 (CH), 129.0 (CH), 130.8 (CH), 131.2 (CH), 134.4 (CH), 137.6 (C), 139.1 (C), 142.4 (C), 146.2 (C), 147.4 (C), 151.1 (C), 153.0 (C), 165.4 (C), 190.1 (C); MS (EI) m/z 430 (M<sup>+</sup>, 100%), 415 (5), 386 (7). HRMS (IE) m/z calcd. for C<sub>28</sub>H<sub>22</sub>N<sub>4</sub>O [M]<sup>+</sup>: 430.1778; found 430.1794.

*3-Methyl-1-phenyl-4-(p-tolyl)indeno[1,2-b]pyrazolo[4,3-e]pyridin-5(1H)-one (4e)*. By following the general procedure for 15 min, **4e** was obtained as pale-yellow crystals (78.3 mg, 78%). Mp >300 °C (Lit.<sup>4</sup> 217-218 °C). <sup>1</sup>H NMR (CDCl<sub>3</sub>): δ = 2.09 (s, 3H), 2.49 (s, 3H), 7.32-7.36 (m, 5H), 7.42 (t, *J* = 7.5 Hz, 1H), 7.53-7.62 (m, 4H), 7.96 (d, *J* = 7.4 Hz, 1H), 8.31 (d, *J* = 8.6 Hz, 2H); <sup>13</sup>C NMR (CDCl<sub>3</sub>): δ = 15.0 (CH<sub>3</sub>), 21.6 (CH<sub>3</sub>), 115.7 (C), 120.1 (C), 121.4 (CH), 121.6 (CH), 123.4 (CH), 126.3 (CH), 128.7 (CH), 129.0 (CH), 129.7 (C), 131.4 (CH), 134.6 (CH), 137.4 (C), 139.0 (C), 139.1 (C), 142.4 (C), 146.0 (C), 146.3 (C), 152.8 (C), 165.1 (C), 189.9 (C); MS (EI) m/z 401

(M<sup>+</sup>, 100%), 386 (41), 324 (8). HRMS (IE) m/z calcd. for C<sub>27</sub>H<sub>19</sub>N<sub>3</sub>O [M]<sup>+</sup>: 401.1528; found 401.1517.

*4-(4-Chlorophenyl)-3-methyl-1-phenylindeno[1,2-b]pyrazolo[4,3-e]pyridin-5(1H)-one (4f)*. By following the general procedure for 10 min, **4f** was obtained as yellow crystals (93.9 mg, 89%). Mp 268-270 °C (Lit.<sup>4</sup> 269-270 °C). <sup>1</sup>H NMR (CDCl<sub>3</sub>): δ = 2.08 (s, 3H), 7.35 (t, *J* = 7.4 Hz, 1H), 7.38-7.44 (m, 3H), 7.50-7.61 (m, 6H), 7.95 (d, *J* = 7.4 Hz, 1H), 8.29 (d, *J* = 8.9 Hz, 2H); <sup>13</sup>C NMR (CDCl<sub>3</sub>): δ = 15.0 (CH<sub>3</sub>), 115.3 (C), 120.0 (C), 121.5 (CH), 121.6 (CH), 123.5 (CH), 126.5 (CH), 128.3 (CH), 129.1 (CH), 130.2 (CH), 131.1 (C), 131.6 (CH), 134.8 (CH), 135.4 (C), 137.3 (C), 139.0 (C), 142.3 (C), 144.4 (C), 145.6 (C), 152.7 (C), 165.0 (C), 189.8 (C); MS (EI) m/z 423/421 (M<sup>+</sup>, 37/100%), 406 (5), 386 (10). HRMS (IE) m/z calcd. for C<sub>26</sub>H<sub>16</sub>ClN<sub>3</sub>O [M]<sup>+</sup>: 421.0982; found 421.0978.

*4-(4-Bromophenyl)-3-methyl-1-phenylindeno[1,2-b]pyrazolo[4,3-e]pyridin-5(1H)-one (4g)*. By following the general procedure for 10 min, **4g** was obtained as pale-yellow crystals (107.3 mg, 92%). Mp 264-265 °C (Lit.<sup>4</sup> 274-276 °C). <sup>1</sup>H NMR (CDCl<sub>3</sub>): δ = 2.10 (s, 3H), 7.33-7.38 (m, 3H), 7.50-7.64 (m, 5H), 7.67 (d, *J* = 8.9 Hz, 2H), 7.98 (d, *J* = 7.4 Hz, 1H), 8.29 (d, *J* = 8.9 Hz, 2H); <sup>13</sup>C NMR (CDCl<sub>3</sub>): δ = 15.0 (CH<sub>3</sub>), 115.2 (C), 119.9 (C), 121.5 (CH), 121.6 (CH), 123.6 (CH), 123.7 (C), 126.5 (CH), 129.1 (CH), 130.4 (CH), 131.3 (CH), 134.8 (CH), 135.8 (C), 138.9 (C), 142.4 (C), 144.3 (C), 145.6 (C), 152.8 (C), 165.1 (C), 189.8 (C); MS (EI) m/z 467/465 (M<sup>+</sup>, 97/100%), 450 (5), 386 (15). HRMS (IE) m/z calcd. for C<sub>26</sub>H<sub>16</sub>BrN<sub>3</sub>O [M]<sup>+</sup>: 465.0477; found 465.0494.

*3-Methyl-4-(4-nitrophenyl)-1-phenylindeno[1,2-b]pyrazolo[4,3-e]pyridin-5(1H)-one (4h)*. By following the general procedure for 10 min, **4h** was obtained as pale-yellow crystals (77.8 mg, 72%). Mp 245-246 °C (Lit.<sup>4</sup> >300 °C). <sup>1</sup>H NMR (CDCl<sub>3</sub>): δ = 2.05 (s, 3H), 7.38 (t, *J* = 7.4 Hz, 1H), 7.46 (t, *J* = 7.4 Hz, 1H), 7.57 (t, *J* = 7.6 Hz, 1H), 7.64 (m, 4H), 8.00 (d, *J* = 7.9 Hz, 1H), 8.29 (d, *J* = 7.6 Hz, 2H), 8.41 (d, *J* = 8.7 Hz, 2H); <sup>13</sup>C NMR (CDCl<sub>3</sub>): δ = 14.9 (CH<sub>3</sub>), 114.7 (C), 119.9 (C), 121.7 (CH), 123.3 (CH), 123.7 (CH), 126.7 (CH), 131.8 (CH), 135.1 (CH), 137.2 (C), 138.7 (C), 139.6 (C), 142.3 (C), 142.5 (C), 145.1 (C), 148.4 (C), 152.8 (C), 165.0 (C), 189.7 (C); MS (EI) m/z 432 (M<sup>+</sup>, 100%), 417 (3), 386 (9), 345 (5). HRMS (IE) m/z calcd. for C<sub>26</sub>H<sub>16</sub>N<sub>4</sub>O<sub>3</sub> [M]<sup>+</sup>: 432.1222; found 432.1231.

*3-(tert-Butyl)-1,4-diphenylindeno[1,2-b]pyrazolo[4,3-e]pyridin-5(1H)-one (4i)*. By following the general procedure for 15 min, **4i** was obtained as yellow crystals (83.8 mg, 78%). Mp 230-232 °C; <sup>1</sup>H NMR (CDCl<sub>3</sub>): δ = 1.15 (s, 9H), 7.36 (m, 3H), 7.42 (t, *J* = 7.4 Hz, 1H), 7.49-7.61 (m, 7H), 7.99 (d, *J* = 7.4 Hz, 1H), 8.37 (d, *J* = 8.7 Hz, 2H); <sup>13</sup>C NMR (CDCl<sub>3</sub>): δ = 30.2 (CH<sub>3</sub>), 34.2 (C), 114.8 (C), 121.0 (C), 121.3 (CH), 122.0 (CH), 123.4 (CH), 126.1 (CH), 127.9 (CH), 128.7 (CH), 128.8 (CH), 129.0 (CH), 131.4 (CH), 134.6 (CH), 136.2 (C), 137.6 (C), 139.2 (C), 142.1 (C), 146.2 (C), 153.6 (C), 157.0 (C), 163.9 (C), 190.0 (C); MS (EI) *m/z* 429 (M<sup>+</sup>, 73%), 414 (100), 399 (23), 384 (24). HRMS (IE) *m/z* calcd. for C<sub>29</sub>H<sub>23</sub>N<sub>3</sub>O [M]<sup>+</sup>: 429.1841; found 429.1843.

*3-(tert-Butyl)-1-phenyl-4-(p-tolyl)indeno[1,2-b]pyrazolo[4,3-e]pyridin-5(1H)-one (4j)*. By following the general procedure for 15 min, **4j** was obtained as pale-yellow crystals (85.4 mg, 77%). Mp 207-208 °C; <sup>1</sup>H NMR (CDCl<sub>3</sub>): δ = 1.16 (s, 9H), 2.50 (s, 3H), 7.24 (d, *J* = 8.6 Hz, 2H), 7.32-7.39 (m, 3H), 7.41 (t, *J* = 7.4 Hz, 1H), 7.54-7.61 (m, 4H), 7.98 (d, *J* = 7.4 Hz, 1H), 8.37 (d, *J* = 8.6 Hz, 2H); <sup>13</sup>C NMR (CDCl<sub>3</sub>): δ = 21.6 (CH<sub>3</sub>), 30.3 (CH<sub>3</sub>), 34.3 (C), 115.1 (C), 121.2 (C), 121.3 (CH), 122.0 (CH), 123.4 (CH), 126.3 (CH), 128.5 (CH), 128.6 (CH), 128.9 (CH), 131.4 (CH), 133.2 (C), 134.6 (CH), 137.6 (C), 138.6 (C), 139.2 (C), 142.1 (C), 146.6 (C), 153.5 (C), 157.1 (C), 163.9 (C), 190.1 (C); MS (EI) *m/z* 443 (M<sup>+</sup>, 70%), 428 (100), 413 (25), 398 (28). HRMS (IE) *m/z* calcd. for C<sub>30</sub>H<sub>25</sub>N<sub>3</sub>O [M]<sup>+</sup>: 443.1998; found 443.2004.

*3-(tert-Butyl)-4-(4-chlorophenyl)-1-phenylindeno[1,2-b]pyrazolo[4,3-e]pyridin-5(1H)-one (4k)*. By following the general procedure for 10 min, **4k** was obtained as yellow crystals (96.1 mg, 83%). Mp 235-237 °C; <sup>1</sup>H NMR (CDCl<sub>3</sub>): δ = 1.16 (s, 9H), 7.30 (d, *J* = 8.5 Hz, 2H), 7.36 (t, *J* = 7.5 Hz, 1H), 7.42 (t, *J* = 7.4 Hz, 1H), 7.51 (d, *J* = 8.6 Hz, 1H), 7.54-7.62 (m, 4H), 7.98 (d, *J* = 7.4 Hz, 1H), 8.36 (d, *J* = 8.7 Hz, 2H); <sup>13</sup>C NMR (CDCl<sub>3</sub>): δ = 30.4 (CH<sub>3</sub>), 34.2 (C), 114.6 (C), 120.9 (C), 121.4 (CH), 122.0 (CH), 123.5 (CH), 126.4 (CH), 128.3 (CH), 129.0 (CH), 130.2 (CH), 131.6 (CH), 134.6 (C), 134.8 (CH), 135.0 (C), 137.5 (C), 139.1 (C), 142.0 (C), 144.7 (C), 153.5 (C), 156.8 (C), 163.8 (C), 190.0 (C); MS (EI) *m/z* 465/463 (M<sup>+</sup>, 23/65%), 450/448 (36/100), 435/433 (6/18). HRMS (IE) *m/z* calcd. for C<sub>29</sub>H<sub>22</sub>ClN<sub>3</sub>O [M]<sup>+</sup>: 463.1451; found 463.1458.

*4-(4-Bromophenyl)-3-(tert-butyl)-1-phenylindeno[1,2-b]pyrazolo[4,3-e]pyridin-5(1H)-one (4l)*. By following the general procedure for 10 min, **4l** was obtained as yellow crystals (119.5 mg, 94%). Mp 233-235 °C; <sup>1</sup>H NMR (CDCl<sub>3</sub>): δ = 1.16 (s, 9H), 7.24 (d, *J* = 8.1 Hz, 2H), 7.36 (t, *J* =



7.5 Hz, 1H), 7.42 (t,  $J = 7.4$  Hz, 1H), 7.54-7.61 (m, 4H), 7.65 (d,  $J = 8.2$  Hz, 1H), 7.97 (d,  $J = 7.4$  Hz, 1H), 8.35 (d,  $J = 8.7$  Hz, 2H);  $^{13}\text{C}$  NMR ( $\text{CDCl}_3$ ):  $\delta = 30.4$  ( $\text{CH}_3$ ), 34.2 (C), 114.5 (C), 121.4 (C), 122.0 (CH), 123.1 (C), 123.5 (CH), 126.4 (CH), 129.0 (CH), 130.5 (CH), 131.2 (CH), 131.6 (CH), 134.8 (CH), 135.1 (C), 137.4 (C), 139.1 (C), 142.0 (C), 144.6 (C), 153.5 (C), 156.8 (C), 163.8 (C), 189.9 (C); MS (EI)  $m/z$  509/507 ( $\text{M}^+$ , 79/69%), 494/492 (100/87), 398 (50). HRMS (IE)  $m/z$  calcd. for  $\text{C}_{29}\text{H}_{22}\text{BrN}_3\text{O}$  [ $\text{M}$ ] $^+$ : 507.0946; found 507.0945.

*3-(tert-Butyl)-1-phenyl-4-(4-(trifluoromethyl)phenyl)indeno[1,2-b]pyrazolo[4,3-e]pyridin-5(1H)-one (4m)*. By following the general procedure for 10 min, **4m** was obtained as pale-yellow crystals (112.0 mg, 90%). Mp 250-252 °C;  $^1\text{H}$  NMR ( $\text{CDCl}_3$ ):  $\delta = 1.13$  (s, 9H), 7.38 (t,  $J = 7.4$  Hz, 1H), 7.43 (t,  $J = 7.5$  Hz, 1H), 7.51 (d,  $J = 8.0$  Hz, 1H), 7.56-7.62 (m, 4H), 7.79 (d,  $J = 7.9$  Hz, 2H), 7.99 (d,  $J = 7.4$  Hz, 1H), 8.36 (d,  $J = 8.7$  Hz, 2H);  $^{13}\text{C}$  NMR ( $\text{CDCl}_3$ ):  $\delta = 30.3$  ( $\text{CH}_3$ ), 34.2 (C), 114.3 (C), 120.7 (C), 121.5 (CH), 122.1 (CH), 123.5 (CH), 125.0 (CH, q,  $J = 3.7$  Hz), 126.5 (CH), 129.0 (CH), 129.4 (CH), 130.6, 131.0, 131.3, 131.6 (C-CF<sub>3</sub>, q,  $J = 33.0$  Hz), 131.7 (CH), 134.9 (CH), 137.4 (C), 139.1 (C), 140.1 (C), 142.0 (C), 144.2 (C), 153.5 (C), 156.7 (C), 163.8 (C), 189.89 (C); MS (EI)  $m/z$  497 ( $\text{M}^+$ , 58%), 482 (100), 455 (18). HRMS (IE)  $m/z$  calcd. for  $\text{C}_{30}\text{H}_{22}\text{F}_3\text{N}_3\text{O}$  [ $\text{M}$ ] $^+$ : 497.1715; found 497.1718.

*3-(tert-Butyl)-4-(4-methoxyphenyl)-1-phenylindeno[1,2-b]pyrazolo[4,3-e]pyridin-5(1H)-one (4n)*. By following the general procedure for 10 min, **4n** was obtained as orange crystals (89.5 mg, 78%). Mp 228-230 °C;  $^1\text{H}$  NMR ( $\text{CDCl}_3$ ):  $\delta = 1.17$  (s, 9H), 3.92 (s, 3H), 7.05 (d,  $J = 8.7$  Hz, 2H), 7.27 (d,  $J = 8.7$  Hz, 2H), 7.35 (t,  $J = 7.4$  Hz, 1H), 7.54-7.61 (m, 4H), 7.98 (d,  $J = 7.3$  Hz, 1H), 8.37 (d,  $J = 8.7$  Hz, 2H);  $^{13}\text{C}$  NMR ( $\text{CDCl}_3$ ):  $\delta = 30.3$  ( $\text{CH}_3$ ), 34.3 (C), 55.3 ( $\text{CH}_3$ ), 113.4 (CH), 115.3 (C), 121.3 (CH), 121.4 (C), 122.0 (CH), 123.4 (CH), 126.3 (CH), 128.3 (C), 129.0 (CH), 130.0 (CH), 131.4 (CH), 134.6 (CH), 137.6 (C), 139.2 (C), 142.1 (C), 146.4 (C), 153.6 (C), 157.1 (C), 160.0 (C), 163.9 (C), 190.2 (C); MS (EI)  $m/z$  459 ( $\text{M}^+$ , 79%), 444 (100), 429 (36), 414 (21). HRMS (IE)  $m/z$  calcd. for  $\text{C}_{30}\text{H}_{25}\text{N}_3\text{O}_2$  [ $\text{M}$ ] $^+$ : 459.1947; found 459.1931.

*3-(tert-Butyl)-4-(4-nitrophenyl)-1-phenylindeno[1,2-b]pyrazolo[4,3-e]pyridin-5(1H)-one (4o)*. By following the general procedure for 10 min, **4o** was obtained as pale-orange crystals (89.0 mg, 75%). Mp 270-272 °C;  $^1\text{H}$  NMR ( $\text{CDCl}_3$ ):  $\delta = 1.14$  (s, 9H), 7.39 (t,  $J = 7.4$  Hz, 1H), 7.45 (t,  $J = 7.5$  Hz, 1H), 7.56-7.64 (m, 6H), 8.00 (d,  $J = 7.4$  Hz, 1H), 8.35 (d,  $J = 8.6$  Hz, 2H), 8.40 (d,  $J = 8.7$

Hz, 2H);  $^{13}\text{C}$  NMR ( $\text{CDCl}_3$ ):  $\delta = 30.4$  ( $\text{CH}_3$ ), 34.2 (C), 113.8 (C), 120.5 (C), 121.6 (CH), 122.1 (CH), 123.3 (CH), 123.6 (CH), 126.7 (CH), 129.0 (CH), 130.2 (CH), 131.8 (CH), 135.0 (CH), 137.3 (C), 139.0 (C), 142.0 (C), 143.0 (C), 143.2 (C), 148.2 (C), 156.5 (C), 163.8 (C), 189.8 (C); MS (EI)  $m/z$  474 ( $\text{M}^+$ , 53%), 459 (100), 432 (15), 398 (11). HRMS (IE)  $m/z$  calcd. for  $\text{C}_{29}\text{H}_{22}\text{N}_4\text{O}_3$  [ $\text{M}$ ] $^+$ : 474.1692; found 474.1696.

*3-(tert-Butyl)-1-(4-chlorophenyl)-4-phenylindeno[1,2-b]pyrazolo[4,3-e]pyridin-5(1H)-one (4p)*. By following the general procedure for 15 min, **4p** was obtained as yellow crystals (99.7 mg, 86%). Mp 233-235 °C (Lit.<sup>5</sup> 237-238 °C);  $^1\text{H}$  NMR ( $\text{CDCl}_3$ ):  $\delta = 1.14$  (s, 9H), 7.35 (d,  $J = 8.7$  Hz, 2H), 7.43 (t,  $J = 7.5$  Hz, 1H), 7.49-762 (m, 7H), 7.96 (d,  $J = 7.5$  Hz, 1H) and 8.35 (d,  $J = 8.9$  Hz, 2H);  $^{13}\text{C}$  NMR ( $\text{CDCl}_3$ ):  $\delta = 30.2$  ( $\text{CH}_3$ ), 34.3 (C), 115.0 (C), 121.1 (C), 121.3 (CH), 122.9 (CH), 123.5 (CH), 127.9 (CH), 128.7 (CH), 128.9 (CH), 129.0 (CH), 131.5 (C), 131.6 (CH), 134.7 (CH), 136.0 (C), 137.5 (C), 137.8 (C), 141.9 (C), 146.3 (C), 153.5 (C), 157.3 (C), 164.0 (C), 189.8 (C); MS (EI)  $m/z$  465/463 ( $\text{M}^+$ , 21/71%), 450/448 (37/100), 435/433 (6/14), 420/418 (19/21). HRMS (IE)  $m/z$  calcd. for  $\text{C}_{29}\text{H}_{22}\text{ClN}_3\text{O}$  [ $\text{M}$ ] $^+$ : 463.1451; found 463.1469. The characterization data for **4p** match previously reported data by us.<sup>5</sup>

*3-(tert-Butyl)-1-(4-chlorophenyl)-4-(p-tolyl)indeno[1,2-b]pyrazolo[4,3-e]pyridin-5(1H)-one (4q)*. By following the general procedure for 15 min, **4q** was obtained as yellow crystals (88.0 mg, 78%). Mp 213-215 °C;  $^1\text{H}$  NMR ( $\text{CDCl}_3$ ):  $\delta = 1.15$  (s, 9H), 2.50 (s, 3H), 7.23 (d,  $J = 8.0$  Hz, 2H), 7.33 (d,  $J = 7.9$  Hz, 2H), 7.42 (t,  $J = 7.4$  Hz, 1H), 7.52 (d,  $J = 9.0$  Hz, 2H), 7.56-761 (m, 2H), 7.96 (d,  $J = 7.5$  Hz, 1H), 8.38 (d,  $J = 8.9$  Hz, 2H);  $^{13}\text{C}$  NMR ( $\text{CDCl}_3$ ):  $\delta = 21.6$  ( $\text{CH}_3$ ), 30.2 ( $\text{CH}_3$ ), 34.3 (C), 115.2 (C), 121.2 (CH), 121.3 (C), 122.9 (CH), 123.5 (CH), 128.5 (CH), 128.6 (CH), 129.0 (CH), 129.7 (C), 131.5 (CH), 133.0 (C), 134.6 (CH), 137.6 (C), 137.8 (C), 138.7 (C), 141.9 (C), 146.7 (C), 153.5 (C), 157.4 (C), 164.0 (C), 189.9 (C); MS (EI)  $m/z$  479/477 ( $\text{M}^+$ , 27/76%), 464/462 (38/100), 449/447 (9/27), 434/432 (27/32). HRMS (IE)  $m/z$  calcd. for  $\text{C}_{30}\text{H}_{24}\text{ClN}_3\text{O}$  [ $\text{M}$ ] $^+$ : 447.1608; found 447.1605.

*3-(tert-Butyl)-1,4-bis(4-chlorophenyl)indeno[1,2-b]pyrazolo[4,3-e]pyridin-5(1H)-one (4r)*. By following the general procedure for 15 min, **4r** was obtained as yellow crystals (99.7 mg, 80%). Mp 260-262 °C;  $^1\text{H}$  NMR ( $\text{CDCl}_3$ ):  $\delta = 1.15$  (s, 9H), 7.29 (d,  $J = 8.7$  Hz, 2H), 7.43 (t,  $J = 7.5$  Hz, 1H), 7.49-762 (m, 6H), 7.97 (d,  $J = 7.4$  Hz, 1H), 8.36 (d,  $J = 9.0$  Hz, 2H);  $^{13}\text{C}$  NMR ( $\text{CDCl}_3$ ):  $\delta = 30.3$  ( $\text{CH}_3$ ), 34.3 (C), 114.8 (C), 121.1 (C), 121.4 (CH), 122.9 (CH), 123.6 (CH), 128.3 (CH),

129.0 (CH), 130.2 (CH), 131.6 (CH), 131.7 (C), 134.5 (C), 134.8 (CH), 135.1 (C), 137.4 (C), 137.7 (C), 141.8 (C), 144.8 (C), 153.5 (C), 157.1 (C), 163.9 (C), 189.8 (C); MS (EI)  $m/z$  501/500/499/497 ( $M^+$ , 7/10/52/68%), 484/483/482/467/457 (75/11/100/13/23). HRMS (IE)  $m/z$  calcd. for  $C_{29}H_{21}Cl_2N_3O$  [ $M$ ] $^+$ : 497.1062; found 497.1056.

*4-(4-Bromophenyl)-3-(tert-butyl)-1-(4-chlorophenyl)indeno[1,2-*b*]pyrazolo[4,3-*e*]pyridin-5(1*H*)-one (4s)*. By following the general procedure for 15 min, **4s** was obtained as pale-yellow crystals (124.8 mg, 92%). Mp 252-254 °C;  $^1H$  NMR ( $CDCl_3$ ):  $\delta$  = 1.15 (s, 9H), 7.23 (d,  $J$  = 8.4 Hz, 2H), 7.43 (t,  $J$  = 7.5 Hz, 1H), 7.52 (d,  $J$  = 9.0 Hz, 2H), 7.57-7.63 (m, 2H), 7.66 (d,  $J$  = 8.3 Hz, 2H), 7.97 (d,  $J$  = 7.5 Hz, 1H), 8.36 (d,  $J$  = 8.9 Hz, 2H);  $^{13}C$  NMR ( $CDCl_3$ ):  $\delta$  = 30.3 (CH<sub>3</sub>), 34.3 (C), 114.7 (C), 121.0 (C), 121.4 (CH), 123.0 (CH), 123.2 (C), 123.6 (CH), 129.1 (CH), 130.5 (CH), 131.2 (CH), 131.7 (CH), 131.8 (C), 134.9 (CH), 135.0 (C), 135.1 (C), 137.4 (C), 137.7 (C), 141.8 (C), 144.7 (C), 153.5 (C), 157.1 (C), 163.9 (C), 189.8 (C); MS (EI)  $m/z$  545/544/543/541 ( $M^+$ , 21/20/100/68%), 530/529/528/526/513 (14/17/98/70/15). HRMS (IE)  $m/z$  calcd. for  $C_{29}H_{21}BrClN_3O$  [ $M$ ] $^+$ : 541.0557; found 541.0541.

*3-(tert-Butyl)-1-(4-chlorophenyl)-4-(4-(trifluoromethyl)phenyl)indeno[1,2-*b*]pirazolo[4,3-*e*]pyridin-5(1*H*)-one (4t)*. By following the general procedure for 15 min, **4t** was obtained as yellow crystals (126.4 mg, 95%). Mp 226-227 °C;  $^1H$  NMR ( $CDCl_3$ ):  $\delta$  = 1.12 (s, 9H), 7.44 (t,  $J$  = 7.4 Hz, 1H), 7.50 (d,  $J$  = 8.0 Hz, 2H), 7.53 (d,  $J$  = 8.9 Hz, 2H), 7.57 (d,  $J$  = 7.4 Hz, 1H), 7.62 (t,  $J$  = 7.5 Hz, 1H), 7.79 (d,  $J$  = 8.1 Hz, 2H), 7.98 (d,  $J$  = 7.4 Hz, 1H), 8.36 (d,  $J$  = 9.0 Hz, 2H);  $^{13}C$  NMR ( $CDCl_3$ ):  $\delta$  = 30.2 (CH<sub>3</sub>), 34.2 (C), 114.4 (C), 120.0, 122.7, 125.4, 128.1 (CF<sub>3</sub>, q,  $J$  = 272.2 Hz), 120.9 (C), 121.5 (CH), 123.0 (CH), 123.6 (CH), 125.0 (CH, q,  $J$  = 3.7 Hz), 129.1 (CH), 129.4 (CH), 130.7, 131.0, 131.4, 131.7 (C-CF<sub>3</sub>, q,  $J$  = 32.3 Hz), 131.7 (CH), 131.8 (C), 135.0 (CH), 137.4 (C), 137.7 (C), 139.9 (C), 141.8 (C), 144.2 (C), 153.5 (C), 157.0 (C), 163.9 (C), 189.7 (C); MS (EI)  $m/z$  533/531 ( $M^+$ , 27/68%), 518/516 (35/100), 489/487 (6/16). HRMS (IE)  $m/z$  calcd. for  $C_{30}H_{21}ClF_3N_3O$  [ $M$ ] $^+$ : 531.1325; found 531.1304.

*3-(tert-Butyl)-1-(4-chlorophenyl)-4-(4-methoxyphenyl)indeno[1,2-*b*]pyrazolo[4,3-*e*]pyridin-5(1*H*)-one (4u)*. By following the general procedure for 20 min, **4u** was obtained as pale-orange crystals (105.0 mg, 79%). Mp 225-227 °C (Lit.<sup>5</sup> 230-231 °C);  $^1H$  NMR ( $CDCl_3$ ):  $\delta$  = 1.16 (s, 9H), 3.92 (s, 3H), 7.05 (d,  $J$  = 8.7 Hz, 2H), 7.26 (d,  $J$  = 8.7 Hz, 2H), 7.42 (t,  $J$  = 7.4 Hz, 1H), 7.51 (d,  $J$

= 8.9 Hz, 2H), 7.56-7.61 (m, 2H), 7.96 (d,  $J = 7.4$  Hz, 1H), 8.37 (d,  $J = 9.0$  Hz, 2H);  $^{13}\text{C}$  NMR ( $\text{CDCl}_3$ ):  $\delta = 30.2$  ( $\text{CH}_3$ ), 34.4 (C), 55.3 ( $\text{CH}_3$ ), 113.4 (CH), 115.5 (C), 121.3 (CH), 121.5 (C), 122.9 (CH), 123.5 (CH), 128.1 (CH), 129.0 (CH), 130.0 (CH), 131.4 (C), 131.5 (CH), 134.7 (CH), 137.6 (C), 137.8 (C), 138.7 (C), 141.9 (C), 146.5 (C), 153.5 (C), 157.4 (C), 164.0 (C), 190.0 (C); MS (EI)  $m/z$  495/493 ( $\text{M}^+$ , 28/77%), 480/478 (36/100), 465/463 (11/37). HRMS (IE)  $m/z$  calcd. for  $\text{C}_{30}\text{H}_{24}\text{ClN}_3\text{O}_2$  [ $\text{M}]^+$ : 493.1557; found 493.1544. The characterization data for **4p** match previously reported data by us.<sup>5</sup>

*3-(tert-Butyl)-1-(4-chlorophenyl)-4-(4-nitrophenyl)indeno[1,2-b]pyrazolo[4,3-e]pyridin-5(1H)-one (4v)*. By following the general procedure for 15 min, **4v** was obtained as yellow crystals (99.2 mg, 78%). Mp 288-290 °C;  $^1\text{H}$  NMR ( $\text{CDCl}_3$ ):  $\delta = 1.14$  (s, 9H), 7.45 (t,  $J = 7.4$  Hz, 1H), 7.51-7.58 (m, 5H), 7.63 (t,  $J = 7.4$  Hz, 1H), 7.99 (d,  $J = 7.5$  Hz, 1H), 8.36 (d,  $J = 9.1$  Hz, 1H), 8.40 (d,  $J = 8.7$  Hz, 1H);  $^{13}\text{C}$  NMR ( $\text{CDCl}_3$ ):  $\delta = 30.4$  ( $\text{CH}_3$ ), 34.2 (C), 114.0 (C), 120.6 (C), 121.6 (CH), 123.0 (CH), 123.3 (CH), 123.7 (CH), 129.1 (CH), 130.2 (CH), 131.9 (CH), 132.0 (C), 135.1 (CH), 137.3 (C), 137.6 (C), 141.8 (C), 143.0 (C), 148.3 (C), 153.5 (C), 156.8 (C), 163.9 (C), 189.6 (C); MS (EI)  $m/z$  510/508 ( $\text{M}^+$ , 23/67%), 495/493 (36/100), 468/466 (5/14). HRMS (IE)  $m/z$  calcd. for  $\text{C}_{29}\text{H}_{21}\text{ClN}_4\text{O}_3$  [ $\text{M}]^+$ : 508.1302; found 508.1300.

*1-(4-Chlorophenyl)-3-methyl-4-phenylindeno[1,2-b]pyrazolo[4,3-e]pyridin-5(1H)-one (4w)*. By following the general procedure for 15 min, **4w** was obtained as yellow crystals (84.4 mg, 80%). Mp 240-242 °C;  $^1\text{H}$  NMR ( $\text{CDCl}_3$ ):  $\delta = 2.04$  (s, 3H), 7.40-7.46 (m, 3H), 7.48-7.55 (m, 5H), 7.58-7.63 (m, 2H), 7.96 (d,  $J = 7.5$  Hz, 1H), 8.32 (d,  $J = 8.9$  Hz, 2H);  $^{13}\text{C}$  NMR ( $\text{CDCl}_3$ ):  $\delta = 14.8$  ( $\text{CH}_3$ ), 115.7 (C), 120.2 (C), 121.4 (CH), 122.4 (CH), 123.5 (CH), 128.0 (CH), 128.6 (CH), 129.1 (CH), 129.2 (CH), 131.6 (CH), 132.6 (C), 134.8 (CH), 137.3 (C), 137.6 (C), 142.3 (C), 145.9 (C), 146.2 (C), 152.8 (C), 165.2 (C), 189.8 (C); MS (EI)  $m/z$  423/421 ( $\text{M}^+$ , 36/100%). HRMS (IE)  $m/z$  calcd. for  $\text{C}_{26}\text{H}_{16}\text{ClN}_3\text{O}$  [ $\text{M}]^+$ : 421.0982; found 421.0988.

*3-(tert-Butyl)-1-(4-nitrophenyl)-4-phenylindeno[1,2-b]pyrazolo[4,3-e]pyridin-5(1H)-one (4x)*. By following the general procedure for 15 min, **4x** was obtained as yellow crystals (89.0 mg, 75%). Mp 245-247 °C;  $^1\text{H}$  NMR ( $\text{DMSO}-d_6$ , 120 °C):  $\delta = 1.11$  (s, 9H), 7.39 (d,  $J = 7.9$  Hz, 2H), 7.47-7.56 (m, 6H), 8.05 (d,  $J = 7.4$  Hz, 1H), 8.42 (d,  $J = 9.2$  Hz, 2H), 8.71 (d,  $J = 9.1$  Hz, 2H);  $^{13}\text{C}$  NMR ( $\text{DMSO}-d_6$ , 120 °C):  $\delta = 29.2$  ( $\text{CH}_3$ ), 33.4 (C), 114.7 (C), 120.0 (C), 120.5 (CH), 120.7 (CH), 122.1 (CH), 124.0 (CH), 126.9 (CH), 128.1 (CH), 128.2 (CH), 131.4 (CH), 134.4 (CH), 134.8 (C),

135.0 (C), 136.4 (C), 140.4 (C), 143.0 (C), 144.4 (C), 145.6 (C), 157.6 (C), 163.2 (C), 187.5 (C); MS (EI) m/z 474 (M<sup>+</sup>, 30%), 459 (100), 444 (33), 429 (17). HRMS (IE) m/z calcd. for C<sub>29</sub>H<sub>22</sub>N<sub>4</sub>O<sub>3</sub> [M]<sup>+</sup>: 474.1692; found 474.1692.

*2-(4-(Dimethylamino)benzylidene)-1H-indene-1,3(2H)-dione 6h*. By following the general procedure for 10 min, **6h** was obtained as bright-orange crystals (65.8 mg, 95%). Mp 192-193 °C (Lit. [37] 203 °C). <sup>1</sup>H NMR (CDCl<sub>3</sub>): δ = 3.13 (s, 6H), 6.73 (d, *J* = 9.2 Hz, 2H), 7.71 (m, 2H), 7.77 (s, 1H), 7.91 (m, 2H), 8.52 (d, *J* = 9.0 Hz, 2H); <sup>13</sup>C NMR (CDCl<sub>3</sub>): δ = 40.0 (CH<sub>3</sub>), 111.4 (CH), 122.0 (C), 122.4 (CH), 123.0 (C), 134.0 (CH), 134.3 (CH), 137.9 (CH), 139.9 (C), 142.2 (C), 147.5 (CH), 153.9 (C), 189.9 (C), 191.7 (C); MS (EI) m/z 277 (M<sup>+</sup>, 100%), 260 (7), 233 (10). HRMS (IE) m/z calcd. for C<sub>18</sub>H<sub>15</sub>NO<sub>2</sub> [M]<sup>+</sup>: 277.1103; found 277.1096.

*2.2.2. General procedure for the synthesis of 2-(4-aryl-3-methyl-1-phenylindeno[1,2-b]pyrazolo[4,3-e]pyridin-5(1H)-ylidene)malononitrile 7a-d*. A mixture of the appropriate ketone **4a-d** (0.22 mmol) and malononitrile (27 mg, 2.2 mmol) in 20 mL of chlorobenzene was added pyridine (0.36 mL, 4.4 mmol) and TiCl<sub>4</sub> (0.24 mL, 2.2 mmol) under argon atmosphere. The mixture was stirred at room temperature for 15 min and it was heated at reflux for 20 h. Then, equal amounts of pyridine and TiCl<sub>4</sub> was added and the final mixture was heated at reflux for 4 h. The resulting crude was added 20 mL of water and partitioned with DCM. The organic layer was washed with water and dried over anhydrous Na<sub>2</sub>SO<sub>4</sub>. Later, the solvent was removed under vacuum and the residue was purified by flash chromatography (eluent: CH<sub>2</sub>Cl<sub>2</sub>:MeOH 50:1 v/v) to give the pure products **7a-d** as orange solids.

*2-(3-Methyl-1,4-diphenylindeno[1,2-b]pyrazolo[4,3-e]pyridin-5(1H)-ylidene)malononitrile (7a)*. By following the general procedure, **7a** was obtained as orange powder (96.0 mg, 96%). Mp. 235-237 °C. <sup>1</sup>H NMR (CDCl<sub>3</sub>): δ = 2.10 (s, 3H), 7.37 (t, *J* = 7.4 Hz, 1H), 7.48-7.65 (m, 9H), 8.05 (d, *J* = 7.0 Hz, 1H), 8.26 (d, *J* = 8.5 Hz, 2H), 8.49 (d, *J* = 7.8 Hz, 1H); <sup>13</sup>C NMR (CDCl<sub>3</sub>): δ = 16.1 (CH<sub>3</sub>), 111.7 (C), 114.8 (C), 115.7 (C), 121.7 (CH), 121.8 (C), 122.4 (CH), 125.9 (CH), 126.7 (CH), 128.7 (C), 129.2 (CH), 129.6 (CH), 129.9 (CH), 130.6 (CH), 131.5 (CH), 134.1 (CH), 134.2 (C), 138.6 (C), 138.7 (C), 139.9 (C), 146.0 (C), 147.7 (C), 152.3 (C), 160.0 (C), 162.1 (C). HRMS (ESI<sup>+</sup>) m/z calcd. for C<sub>29</sub>H<sub>18</sub>N<sub>5</sub> [M+H]<sup>+</sup>: 436.1562; found 436.1548.

*2-(4-(4-Methoxyphenyl)-3-methyl-1-phenylindeno[1,2-b]pyrazolo[4,3-e]pyridin-5(1H)-ylidene)malononitrile (7b)*. By following the general procedure, **7b** was obtained as orange powder (100.0 mg, 98%). Mp. 244-246 °C. Recrystallization of **7b** from DMF afforded crystals of suitable size and quality for single-crystal X-ray diffraction analysis. <sup>1</sup>H NMR (CDCl<sub>3</sub>): δ = 2.19 (s, 3H), 3.93 (s, 3H), 7.14 (d, *J* = 8.7 Hz, 2H), 7.37 (t, *J* = 7.4 Hz, 1H), 7.43 (d, *J* = 8.7 Hz, 2H), 7.49 (t, *J* = 7.6 Hz, 1H), 7.56 (t, *J* = 7.8 Hz, 2H), 7.61 (t, *J* = 7.5 Hz, 1H), 8.04 (d, *J* = 7.0 Hz, 1H), 8.26 (d, *J* = 7.4 Hz, 2H), 8.48 (d, *J* = 7.9 Hz, 1H); <sup>13</sup>C NMR (CDCl<sub>3</sub>): δ = 16.4 (CH<sub>3</sub>), 55.5 (CH<sub>3</sub>), 111.9 (C), 114.9 (C), 115.2 (CH), 115.9 (C), 121.7 (CH), 122.0 (C), 122.4 (CH), 125.8 (CH), 126.3 (C), 126.6 (CH), 128.3 (C), 129.2 (CH), 131.3 (CH), 131.4 (CH), 134.0 (CH), 138.9 (C), 139.9 (C), 146.0 (C), 160.4 (C), 161.5 (C), 161.9 (C). HRMS (ESI+) *m/z* calcd. for C<sub>30</sub>H<sub>20</sub>N<sub>5</sub>O [M+H]<sup>+</sup>: 466.1668; found 466.1647. Crystal data for **7b** were deposited at CCDC (1886021): Chemical formula C<sub>30</sub>H<sub>19</sub>N<sub>5</sub>O, Mr 187.20, Monoclinic, C2/c, 100 K, cell dimensions *a*, *b*, *c* (Å) 14.878(7), 12.149(6), 27.262(12) Å α, β, γ (°) 90, 96.052(12), 90. V (Å<sup>3</sup>) 4900 (4), Z = 8, F(000) = 1936, D<sub>x</sub> (Mg m<sup>-3</sup>) = 1.262, Mo Kα, μ (mm<sup>-1</sup>) = 0.080, Crystal size (mm) = 0.307 x 0.200 x 0.180. Data collection: Diffractometer Bruker D8 Venture (APEX 3), Monochromator multilayer mirror, CCD rotation images, thick slices φ & θ scans, Mo INCOATEC high brilliance microfocus sealed tube (λ = 0.71073 Å), multiscan absorption correction (SADABS-2016/2), T<sub>min</sub>, T<sub>max</sub> 0.6907 0.7456. No. of measured, independent and observed [*I* > 2σ(*I*)] reflections 70658, 5639, 4245, R<sub>int</sub> = 0.091 (0.041), θ values (°): θ<sub>max</sub> = 27.5, θ<sub>min</sub> = 2.25; Range *h* = -19→19, *k* = -15→15, *l* = -35→35, Refinement on F<sup>2</sup>: R[F<sup>2</sup> > 2σ(F<sup>2</sup>)] = 0.0637, wR(F<sup>2</sup>) = 0.0915, S = 1.149. No. of reflections 4245, No. of parameters 327, No. of restraints 0. Weighting scheme: w = 1/σ<sup>2</sup>(F<sub>o</sub><sup>2</sup>) + (0.0346P)<sup>2</sup> + 13.4077P where P = (F<sub>o</sub><sup>2</sup> + 2F<sub>c</sub><sup>2</sup>)/3. (Δ/σ) < 0.001, Δρ<sub>max</sub>, Δρ<sub>min</sub> (e Å<sup>-3</sup>) 0.310, -0.350.

*2-(3-Methyl-1-phenyl-4-(4-(trifluoromethyl)phenyl)indeno[1,2-b]pyrazolo[4,3-e]pyridin-5(1H)-ylidene)malononitrile (7c)*. By following the general procedure, **7c** was obtained as orange powder (111.0 mg, 95%). Mp. 272-273 °C. <sup>1</sup>H NMR (CDCl<sub>3</sub>): δ = 2.07 (s, 3H), 7.38 (t, *J* = 7.4 Hz, 1H), 7.49-7.58 (m, 3H), 7.61-7.66 (m, 3H), 7.88 (d, *J* = 8.0 Hz, 2H), 8.06 (d, *J* = 7.1 Hz, 1H), 8.25 (d, *J* = 8.7 Hz, 2H), 8.49 (d, *J* = 7.9 Hz, 1H); <sup>13</sup>C NMR (CDCl<sub>3</sub>): δ = 16.2 (CH<sub>3</sub>), 111.9 (C), 114.4 (C), 115.2 (C), 121.7 (CH), 122.4 (C), 122.5 (CH), 125.2 (C), 126.0 (CH), 126.6 (CH<sub>o</sub>-CF<sub>3</sub>, *q*, *J* = 3.7 Hz), 126.9 (CH), 129.2 (CH), 130.4 (CH), 131.7 (CH), 132.6 (C<sub>i</sub>-CF<sub>3</sub> *q*, *J* = 67 Hz), 134.3 (CH),

137.9 (C), 138.5 (C), 138.6 (C), 139.7 (C), 145.5 (C), 145.6 (C), 152.2 (C), 159.8 (C), 162.2 (C). HRMS (ESI+) m/z calcd. for C<sub>30</sub>H<sub>27</sub>F<sub>3</sub>N<sub>5</sub> [M+H]<sup>+</sup>: 504.1436; found 504.1419.

2-(4-(4-(Dimethylamino)phenyl)-3-methyl-1-phenylindeno[1,2-b]pyrazolo[4,3-e]pyridin-5(1H)-ylidene)malononitrile (**7d**). By following the general procedure, **7d** was obtained as green powder (53.2 mg, 50%). Mp. >300 °C. <sup>1</sup>H NMR (CDCl<sub>3</sub>): δ = 2.29 (s, 3H), 3.10 (s, 6H), 6.88 (d, *J* = 8.7 Hz, 2H), 7.33-7.37 (m, 3H), 7.48 (t, *J* = 7.6 Hz, 1H), 7.53-7.61 (m, 3H), 8.01 (d, *J* = 7.1 Hz, 1H), 8.26 (d, *J* = 8.4 Hz, 2H), 8.44 (d, *J* = 7.9 Hz, 1H); <sup>13</sup>C NMR (CDCl<sub>3</sub>): δ = 16.8 (CH<sub>3</sub>), 40.2 (CH<sub>3</sub>), 112.0 (C), 112.6 (CH), 115.1 (C), 115.9 (C), 121.0 (C), 121.7 (CH), 122.0 (CH), 122.2 (CH), 125.6 (CH), 126.5 (CH), 129.1 (CH), 131.1 (CH), 131.2 (CH), 133.7 (CH), 138.8 (C), 139.9 (C), 146.2 (C), 149.1 (C), 151.7 (C), 152.6 (C), 161.1 (C), 161.8 (C). HRMS (ESI+) m/z calcd. for C<sub>31</sub>H<sub>23</sub>N<sub>6</sub> [M+H]<sup>+</sup>: 479.1984; found 479.1969.

2.3. *Photophysical properties.* The solvochromic studies of compounds **7a-d** were carried out with 50 μM solutions in toluene (PhMe), dichloromethane (DCM), acetonitrile (ACN), acetone, and dimethyl sulfoxide (DMSO). Fluorescence response in photographs was at an excitation of 365 nm using a UV lamp. The relative quantum yields were obtained using quinine sulfate (φ<sub>F</sub> = 0.59 in 0.15 M HClO<sub>4</sub>) [38] as reference and calculated according to the following equation<sup>6-8</sup>

$$\varphi_{f,x} = \varphi_{f,st} \cdot \frac{F_x}{F_{st}} \cdot \frac{1 - 10^{-A_{st}}}{1 - 10^{-A_x}} \cdot \frac{\eta_x^2}{\eta_{st}^2}$$

where x and st indicate the sample and standard solution, respectively, φ is the quantum yield, F is the integrated area of the emission, A is the absorbance at the excitation wavelength, and η is the index of refraction of the solvents.

2.4. *Computation details.* Theoretical calculations were obtained using DFT performed using Gaussian 09.<sup>9</sup> The DFT calculations employed the B3LYP hybrid functional and the 6-311G+(d,p) basis set. All geometries were optimized in the ground state without solvent effects. Time-dependent (TD-DFT) calculations were performed on optimized geometries. The visual software used in this work was Avogadro 1.2.0 to analyze the output files performed in the calculations.<sup>10</sup>

### 3. Supplementary Analytical Data (Identification of intermediate 5a)

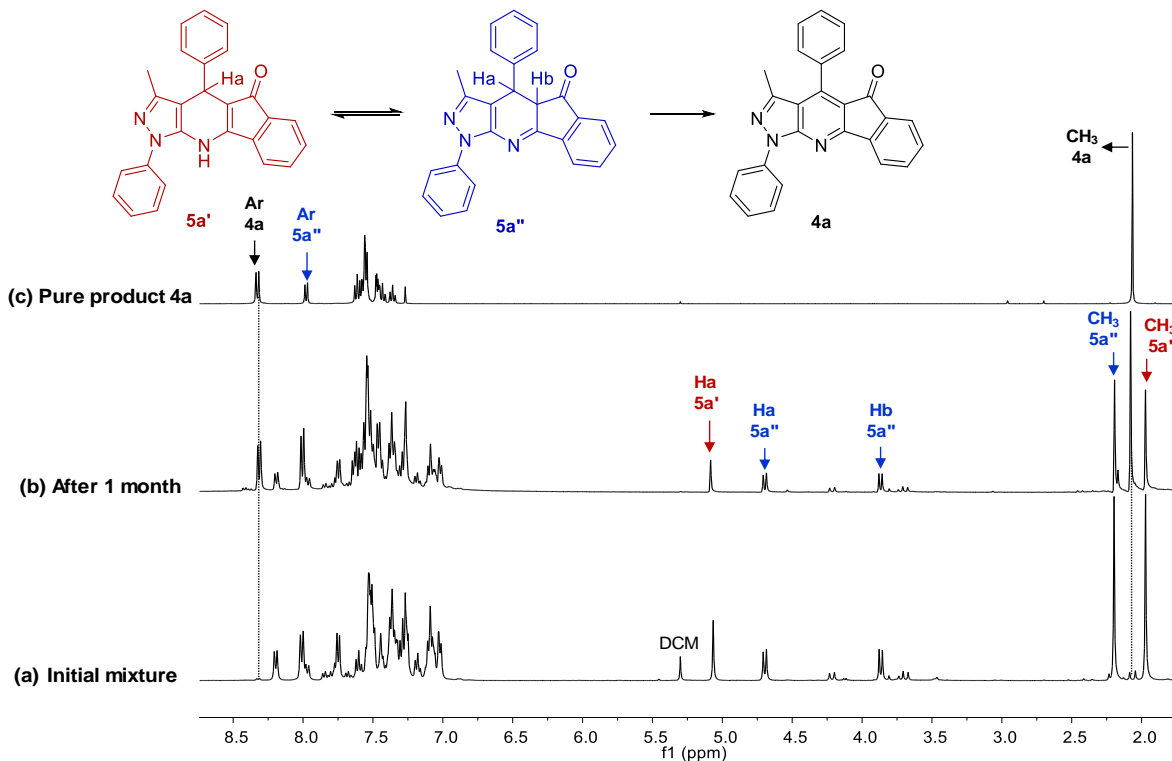

Fig. S 1. Identification by  $^1\text{H}$  NMR (CDCl<sub>3</sub>) of the intermediates **5a'**-**5a''** versus  $^1\text{H}$  NMR of **4a**

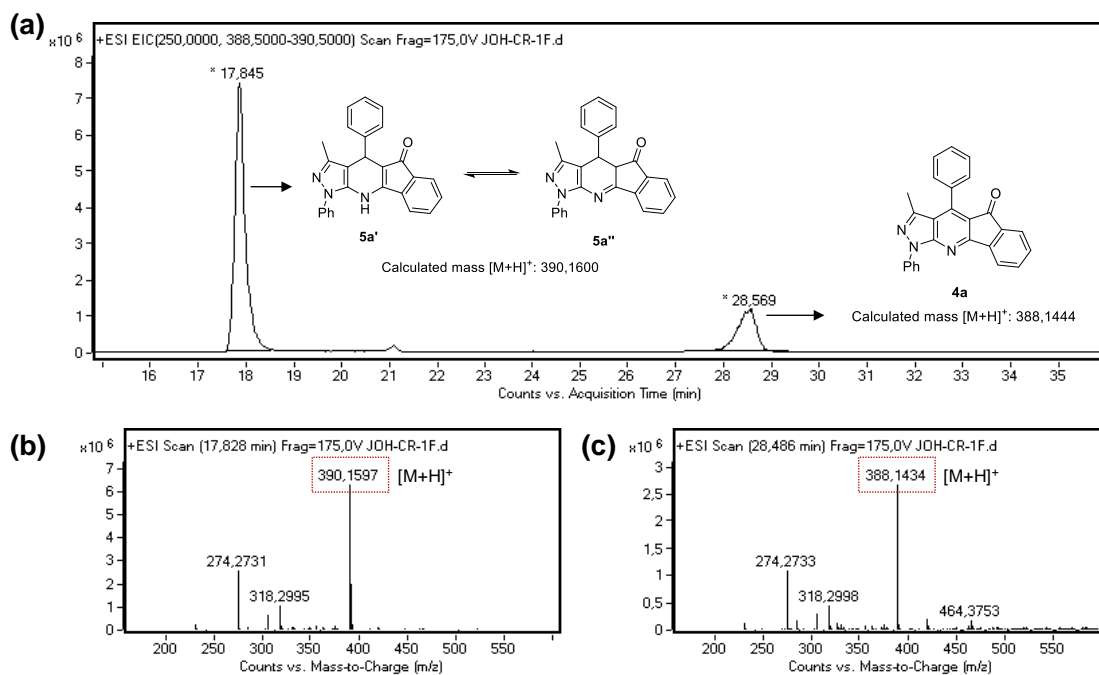

Fig. S2. HPLC-HRMS of the mixture of **5a'**, **5a''** and **4a**



## 4. Photophysical studies

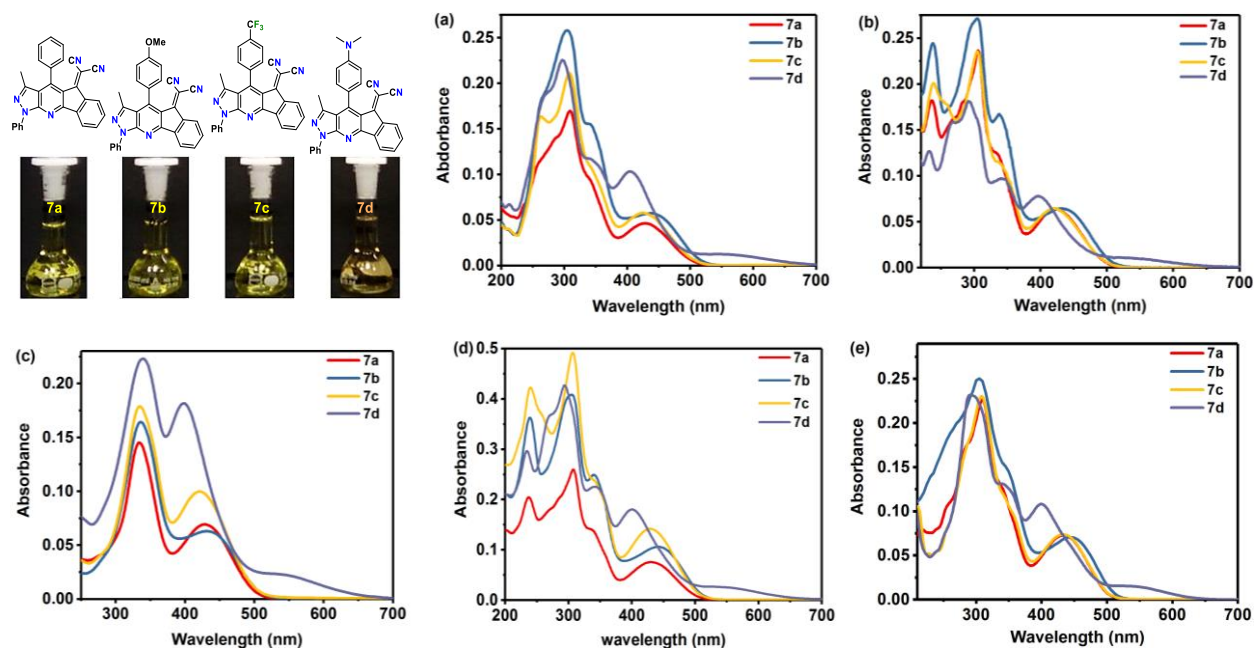

**Fig. S3.** UV-vis spectra of **7a-d** ( $10 \mu\text{M}$ ). (a) DMF, (b) ACN, (c) acetone, (d) DCM, and (e) toluene. Photograph of compounds **7a-d** in DMSO under natural.

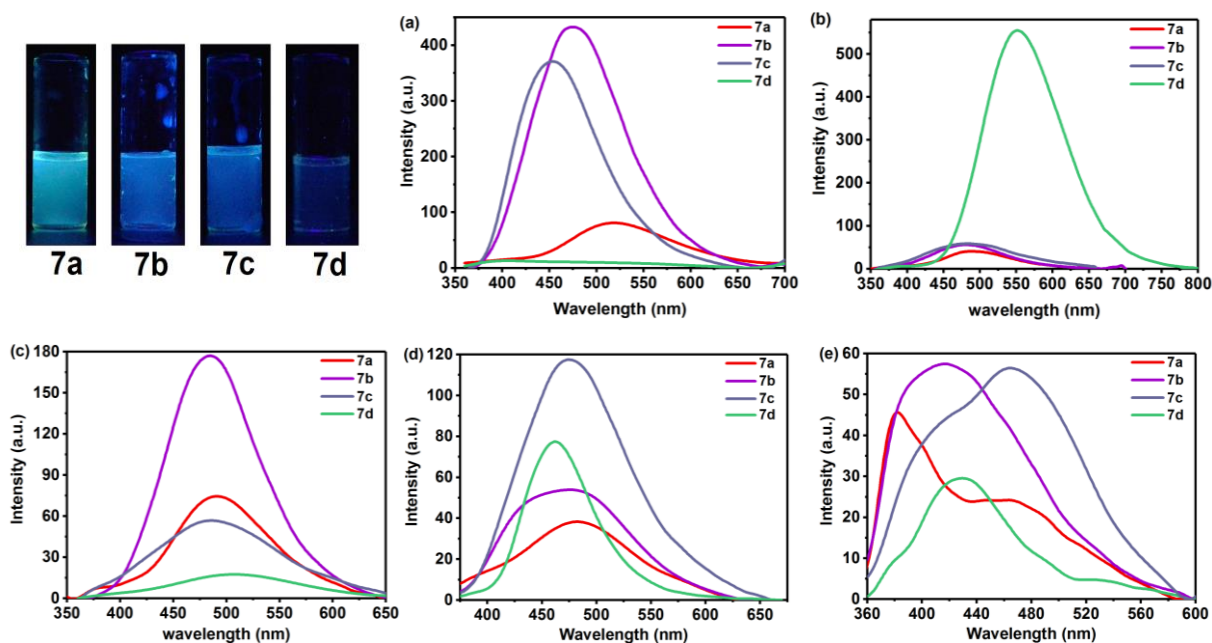

**Fig. S4.** Fluorescence spectra of **7a-d** ( $10 \mu\text{M}$ ). (a) DMF, (b) ACN, (c) acetone, (d) DCM, and (e) toluene. Photograph under a hand-held UV lamp at long wavelength  $\lambda = 365 \text{ nm}$ .

**Table S1.** Photophysical properties of compounds **7a-d**

| Compound  | Solvent <sup>a</sup> | $\lambda_{ab}$<br>(nm) | $\epsilon$ (L mol <sup>-1</sup> cm <sup>-1</sup> ) | $\lambda_{ex}$<br>(nm) | $\lambda_{em}$<br>(nm) | Stokes shift (nm) | $\phi_F$ <sup>b</sup> |
|-----------|----------------------|------------------------|----------------------------------------------------|------------------------|------------------------|-------------------|-----------------------|
| <b>7a</b> | DMSO                 | 309                    | 16970                                              | 340                    | 519                    | 210               | 0.030                 |
|           | ACN                  | 306                    | 23633                                              |                        | 490                    | 184               | 0.011                 |
|           | Acetona              | 334                    | 14523                                              |                        | 491                    | 157               | 0.028                 |
|           | DCM                  | 307                    | 25934                                              |                        | 482                    | 175               | 0.010                 |
|           | Tolueno              | 310                    | 22642                                              |                        | 382                    | 72                | 0.009                 |
| <b>7b</b> | DMSO                 | 304                    | 25793                                              | 345                    | 475                    | 171               | 0.133                 |
|           | ACN                  | 305                    | 27142                                              |                        | 482                    | 177               | 0.013                 |
|           | Acetona              | 336                    | 16433                                              |                        | 485                    | 149               | 0.082                 |
|           | DCM                  | 305                    | 40837                                              |                        | 476                    | 171               | 0.027                 |
|           | Tolueno              | 305                    | 25049                                              |                        | 417                    | 112               | 0.010                 |
| <b>7c</b> | DMSO                 | 308                    | 21140                                              | 350                    | 453                    | 145               | 0.114                 |
|           | ACN                  | 305                    | 23535                                              |                        | 486                    | 181               | 0.015                 |
|           | Acetona              | 335                    | 17885                                              |                        | 485                    | 150               | 0.012                 |
|           | DCM                  | 307                    | 49177                                              |                        | 475                    | 168               | 0.050                 |
|           | Tolueno              | 308                    | 23044                                              |                        | 465                    | 157               | 0.011                 |
| <b>7d</b> | DMSO                 | 297                    | 22544                                              | 350                    | 406                    | 109               | 0.002                 |
|           | ACN                  | 260                    | 20342                                              | 345                    | 550                    | 290               | 0.181                 |
|           | Acetona              | 339                    | 22311                                              | 507                    | 168                    | 0.003             |                       |
|           | DCM                  | 294                    | 42680                                              | 350                    | 462                    | 168               | 0.026                 |
|           | Tolueno              | 291                    | 23195                                              | 430                    | 139                    | 0.006             |                       |

<sup>a</sup>50  $\mu$ M. <sup>b</sup>Relative quantum yields were taken by using quinine sulfate as a reference ( $\phi_F = 0.59$  in 0.15 M HClO<sub>4</sub>).

## 5. Computational calculations

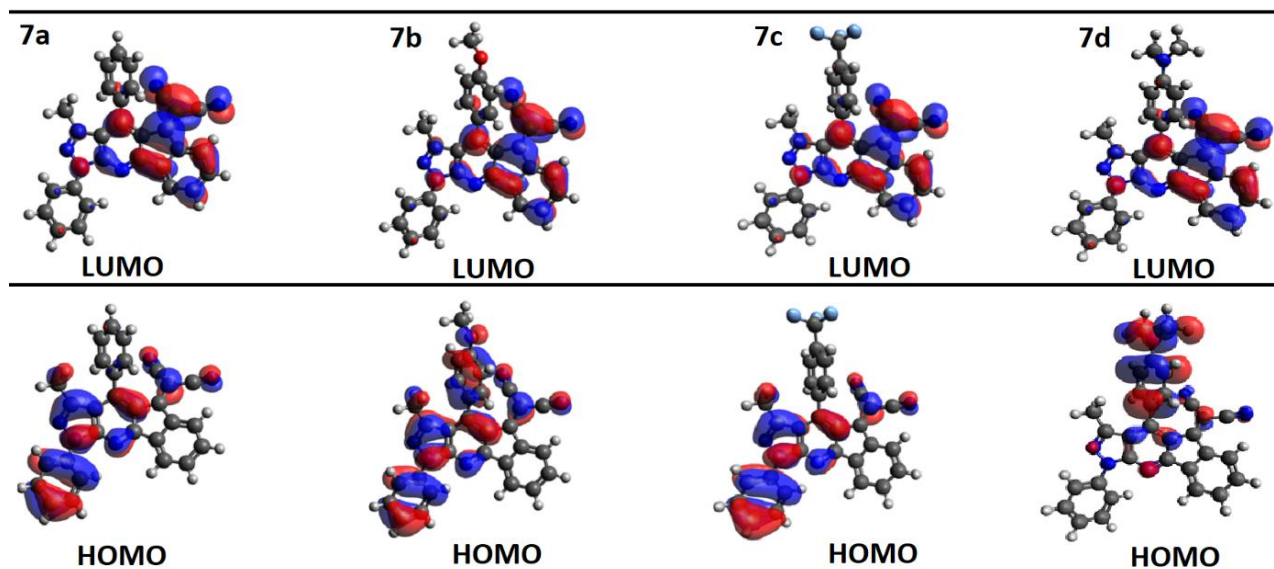**Fig. S5.** Frontier Orbitals of compounds **7a-d**

**Table S2.** Theoretical data of **7a-d**.TD-DFT calculations at B3LYP/6-31G(*d,p*) theory level

| Compound  | Wavelength (nm)          |                           | Excitation energy (eV) | Oscillator strength ( <i>f</i> ) | Transitions                                                                                |
|-----------|--------------------------|---------------------------|------------------------|----------------------------------|--------------------------------------------------------------------------------------------|
|           | Theoretical <sup>a</sup> | Experimental <sup>b</sup> |                        |                                  |                                                                                            |
| <b>7a</b> | 477                      | 434                       | 2.6922                 | 0.6964                           | HOMO-1 → LUMO+1 (100%)                                                                     |
|           | 368                      | -----                     | 3.648                  | 0.0628                           | HOMO-4 → LUMO (22%)<br>HOMO → LUMO+1 (30%)                                                 |
|           | 344                      | 344                       | 3.6019                 | 0.2363                           | HOMO-5 → LUMO (33%)<br>HOMO-2 → LUMO (17%)                                                 |
|           | 295                      | 310                       | 4.1959                 | 0.5933                           | HOMO-1 → LUMO+1 (43%)<br>HOMO-6 → LUMO (31%)                                               |
|           | 291                      | 285                       | 4.2543                 | 0.2476                           | HOMO-8 → LUMO (30%)<br>HOMO-4 → LUMO+1 (24%)<br>HOMO-2 → LUMO+1 (24%)                      |
| <b>7b</b> | 498                      | -----                     | 2.4875                 | 0.0902                           | HOMO-1 → LUMO (35%)<br>HOMO → LUMO (65%)                                                   |
|           | 464                      | -----                     | 2.6707                 | 0.0886                           | HOMO-2 → LUMO (36%)<br>HOMO-1 → LUMO (44%)<br>HOMO → LUMO (20%)                            |
|           | 457                      | 445                       | 2.7156                 | 0.0507                           | HOMO-2 → LUMO (49%)<br>HOMO-1 → LUMO (31%)<br>HOMO → LUMO (20%)                            |
|           | 362                      | -----                     | 3.4225                 | 0.0835                           | HOMO-5 → LUMO (39%)<br>HOMO-3 → LUMO (43%)<br>HOMO → LUMO+1 (18%)                          |
|           | 339                      | 347                       | 3.6538                 | 0.2224                           | HOMO-5 → LUMO (18%)<br>HOMO-3 → LUMO (16%)<br>HOMO-1 → LUMO+1 (38%)                        |
|           | 300                      | 305                       | 4.1259                 | 0.1098                           | HOMO-8 → LUMO (43%)<br>HOMO-3 → LUMO+1 (46%)                                               |
|           | 294                      | 300                       | 4.2079                 | 0.6188                           | HOMO-6 → LUMO (34%)<br>HOMO-2 → LUMO+1 (52%)                                               |
| <b>7c</b> | 480                      | 436                       | 2.5802                 | 0.1984                           | HOMO → LUMO (100%)                                                                         |
|           | 351                      | 355                       | 3.5284                 | 0.1925                           | HOMO-4 → LUMO (44%)<br>HOMO-2 → LUMO (25%)                                                 |
|           | 312                      | 307                       | 3.9615                 | 0.1059                           | HOMO-8 → LUMO (14%)<br>HOMO-7 → LUMO (22%)<br>HOMO-6 → LUMO (17%)<br>HOMO-1 → LUMO+1 (23%) |
|           | 298                      | 285                       | 4.1572                 | 0.4470                           | HOMO-6 → LUMO (28%)<br>HOMO-1 → LUMO+1 (32%)                                               |
| <b>7d</b> | 644                      | -----                     | 1.9259                 | 0.0333                           | HOMO → LUMO (100%)                                                                         |
|           | 471                      | 550                       | 2.6337                 | 0.1850                           | HOMO-2 → LUMO (24%)<br>HOMO-1 → LUMO (76%)                                                 |
|           | 416                      | 400                       | 2.9792                 | 0.1479                           | HOMO → LUMO+1 (100%)                                                                       |
|           | 343                      | 343                       | 3.6133                 | 0.2563                           | HOMO-5 → LUMO (31%)<br>HOMO-3 → LUMO (28%)                                                 |
|           | 297                      | 290                       | 4.1821                 | 0.5251                           | HOMO-9 → LUMO (16%)<br>HOMO-6 → LUMO (28%)<br>HOMO-2 → LUMO+1 (56%)                        |

<sup>a</sup>Data calculated on gas phase. <sup>b</sup> Experimental data in toluene

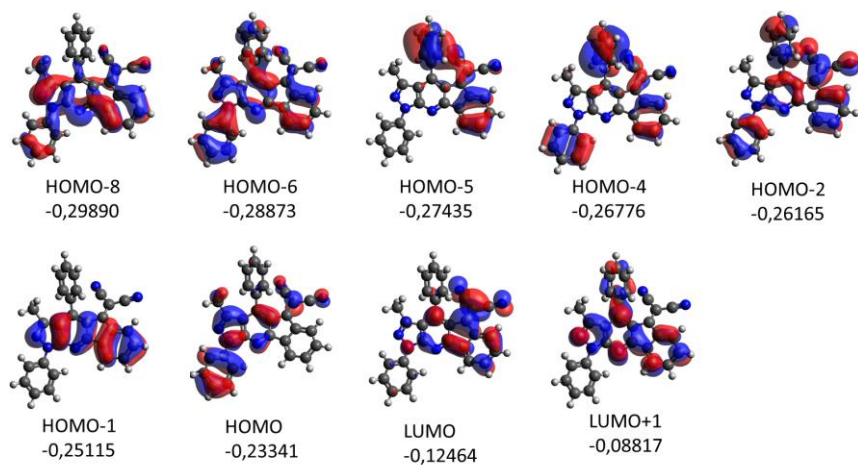

**Fig. S6.** Frontier molecular orbitals of compound **7a**

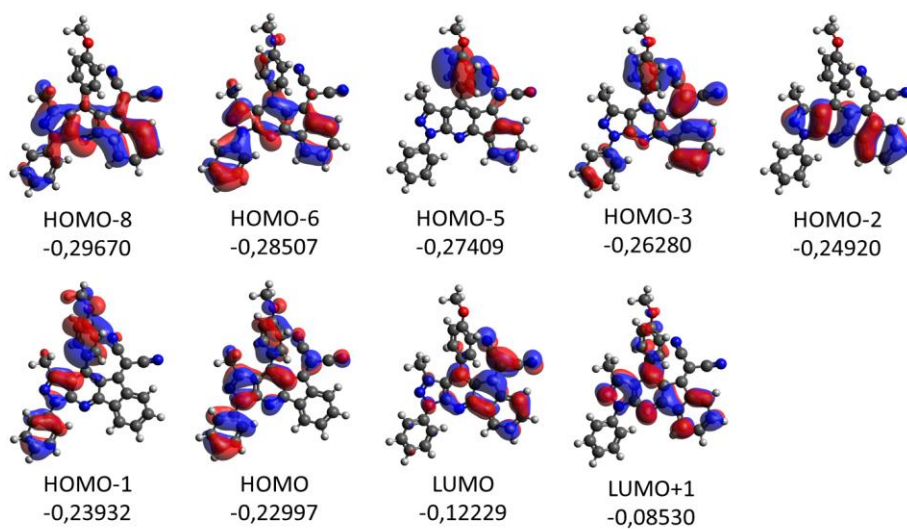

**Fig. S7.** Frontier molecular orbitals of compound **7b**

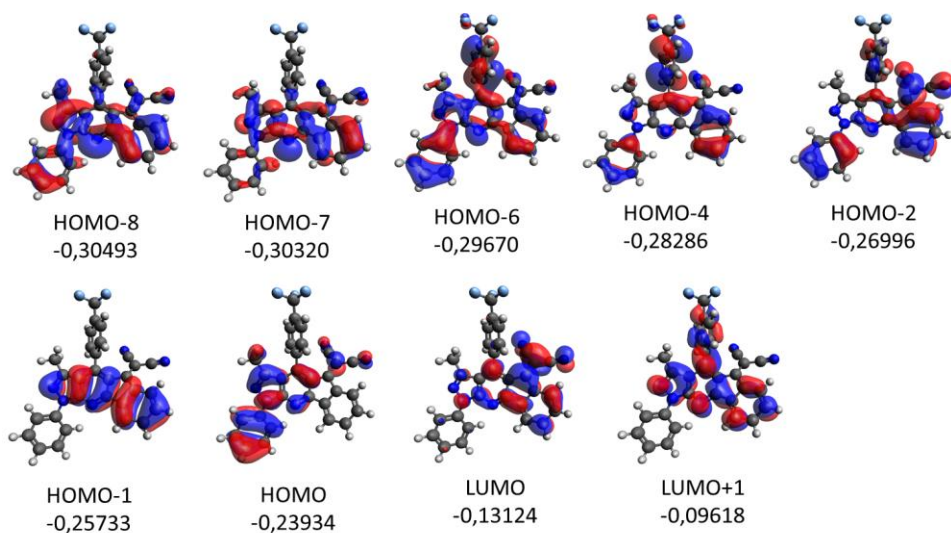

**Fig. S8.** Frontier molecular orbitals of compound **7c**

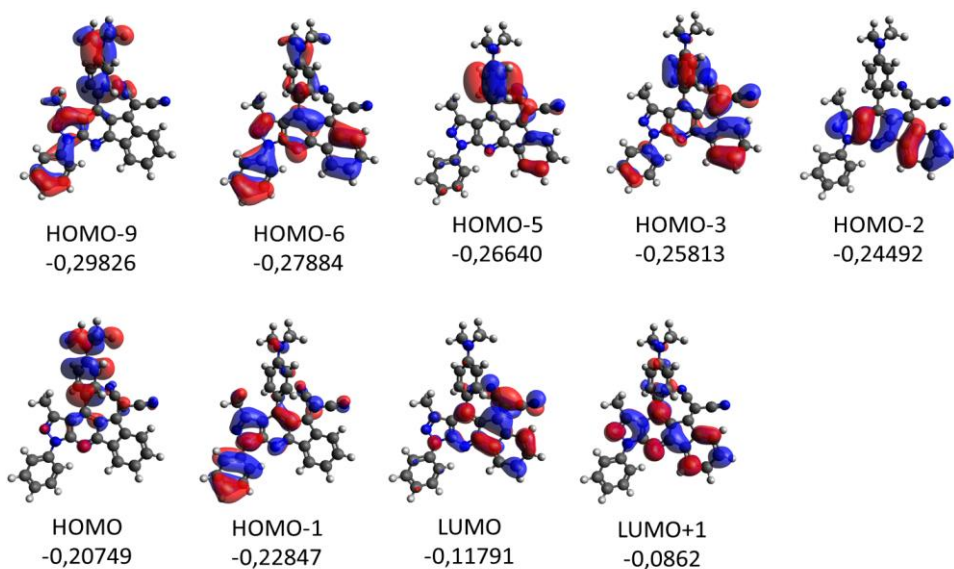

**Fig. S9.** Frontier molecular orbitals of compound **7d**

### 3.1 Coordinates of the optimized structure for **7a** calculated at the B3LYP/6-31+G(d, p) level theory

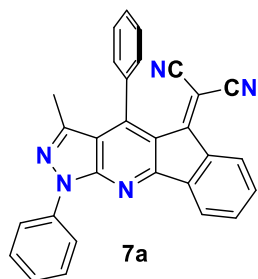

SCF Energy: -1389.11581695 a. u.  
 Num. Imaginary Frequencies: 0  
 HOMO energy: -0.23473 eV  
 LUMO energy: -0.12464 eV

| Atom | X        | Y        | Z        | Atom | X        | Y        | Z        |
|------|----------|----------|----------|------|----------|----------|----------|
| N    | 1.45067  | 1.05228  | -0.06115 | C    | -1.83445 | -3.10994 | -0.64568 |
| N    | 2.93430  | -0.85397 | -0.10439 | H    | -1.25158 | -3.14857 | -1.56033 |
| N    | 2.81572  | -2.21531 | 0.02142  | C    | 0.28379  | 3.88625  | 0.38859  |
| C    | 0.73524  | -1.31264 | -0.03590 | H    | 1.36762  | 3.92419  | 0.35233  |
| C    | 1.69947  | -0.26744 | -0.11266 | C    | 1.13823  | -3.94931 | 0.24177  |
| C    | -0.92496 | 0.39808  | -0.07878 | H    | 0.70276  | -4.36325 | -0.67265 |
| C    | 0.16340  | 1.33793  | -0.01690 | H    | 0.40005  | -4.07391 | 1.03851  |
| C    | -0.64523 | -0.97957 | -0.00566 | H    | 2.03183  | -4.52724 | 0.48791  |
| C    | -0.38103 | 2.68195  | 0.19209  | C    | -3.69689 | -0.37531 | -1.30600 |
| C    | 4.22996  | -0.26664 | -0.14104 | C    | -0.48059 | 5.03090  | 0.64312  |
| C    | 1.52897  | -2.51266 | 0.07449  | H    | 0.01230  | 5.98450  | 0.80679  |
| C    | -2.46838 | -1.96681 | 1.38915  | C    | -3.55541 | -4.04107 | 0.77777  |
| H    | -2.34449 | -1.13953 | 2.08207  | C    | 5.71659  | 1.53469  | -0.75255 |
| C    | -1.67088 | -2.03054 | 0.23438  | H    | 5.86840  | 2.50928  | -1.20706 |
| C    | -3.41449 | 0.82459  | -0.58075 | C    | -1.87670 | 4.95288  | 0.69750  |
| C    | -1.79060 | 2.59313  | 0.22454  | C    | -2.54655 | 3.74129  | 0.48285  |
| C    | -2.17148 | 1.19402  | -0.11203 | H    | -3.62665 | 3.71669  | 0.53297  |
| C    | -3.40051 | -2.96977 | 1.66134  | C    | 6.79950  | 0.83572  | -0.21409 |
| H    | -4.00432 | -2.91244 | 2.56215  | H    | 7.79666  | 1.26431  | -0.24273 |
| C    | 5.31001  | -0.97708 | 0.40023  | C    | 6.58855  | -0.42226 | 0.35767  |
| H    | 5.13823  | -1.95245 | 0.83787  | H    | 7.42197  | -0.97726 | 0.77809  |
| C    | 4.43129  | 0.99071  | -0.72558 | N    | -5.50273 | 2.36420  | -0.47466 |
| H    | 3.59583  | 1.53485  | -1.14522 | N    | -4.00121 | -1.26535 | -1.99246 |
| C    | -4.54912 | 1.69716  | -0.52359 | H    | -2.45743 | 5.84527  | 0.90946  |
| C    | -2.77383 | -4.10471 | -0.37847 | H    | -4.28696 | -4.81645 | 0.98454  |
| H    | -2.90490 | -4.92216 | -1.08085 |      |          |          |          |

### 3.2. Coordinates of the optimized structure for **7b** calculated at the B3LYP/6-31+G(d, p) level theory

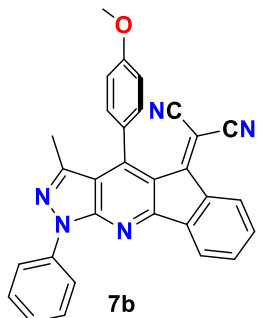

**7b**

SCF Energy: -1503.64623840 a. u.  
 Num. Imaginary Frequencies: 0  
 HOMO energy: -0.22997 eV  
 LUMO energy: -0.12229 eV

| Atom | X        | Y        | Z        | Atom | X        | Y        | Z        |
|------|----------|----------|----------|------|----------|----------|----------|
| O    | -5.56390 | -2.83286 | 0.93302  | H    | -1.80263 | -2.31211 | -1.62545 |
| N    | 2.14749  | 0.73038  | -0.03815 | C    | 2.00578  | 3.78487  | 0.47080  |
| N    | 2.89209  | -1.56622 | -0.11815 | H    | 3.03832  | 3.45157  | 0.45527  |
| N    | 2.31501  | -2.80779 | -0.02855 | C    | 0.14417  | -3.86980 | 0.13214  |
| C    | 0.66709  | -1.24873 | -0.08563 | H    | -0.37496 | -4.10445 | -0.80222 |
| C    | 1.93086  | -0.59364 | -0.12463 | H    | -0.61812 | -3.74332 | 0.90533  |
| C    | -0.30730 | 0.92656  | -0.09768 | H    | 0.78102  | -4.71862 | 0.39127  |
| C    | 1.03415  | 1.43721  | 0.00106  | C    | -3.14347 | 1.16161  | -1.39847 |
| C    | -0.51895 | -0.46546 | -0.05627 | C    | 1.67085  | 5.11730  | 0.73903  |
| C    | 0.97573  | 2.88294  | 0.23336  | H    | 2.45484  | 5.84260  | 0.93510  |
| C    | 4.31058  | -1.45516 | -0.12639 | C    | -4.34638 | -2.31007 | 0.62152  |
| C    | 1.00307  | -2.64890 | 0.00347  | C    | 6.33313  | -0.25502 | -0.67293 |
| C    | -2.61700 | -0.75081 | 1.27820  | H    | 6.81597  | 0.62026  | -1.09745 |
| H    | -2.23947 | -0.01518 | 1.98252  | C    | 0.33089  | 5.51959  | 0.76557  |
| C    | -1.84638 | -1.09571 | 0.15038  | C    | -0.70603 | 4.61290  | 0.50889  |
| C    | -2.48602 | 2.18466  | -0.64517 | H    | -1.73091 | 4.95734  | 0.53787  |
| C    | -0.38007 | 3.28026  | 0.23719  | C    | 7.10334  | -1.29471 | -0.14666 |
| C    | -1.20609 | 2.09976  | -0.13822 | H    | 8.18722  | -1.23167 | -0.15461 |
| C    | -3.84405 | -1.35345 | 1.51877  | C    | 6.46591  | -2.41868 | 0.38653  |
| H    | -4.43405 | -1.09661 | 2.39233  | H    | 7.05250  | -3.23494 | 0.79769  |
| C    | 5.07426  | -2.50461 | 0.40264  | C    | -6.15981 | -3.76465 | 0.03417  |
| H    | 4.57246  | -3.37310 | 0.81043  | H    | -6.31386 | -3.31782 | -0.95508 |
| C    | 4.93909  | -0.32800 | -0.67204 | H    | -7.12477 | -4.02088 | 0.47225  |
| H    | 4.34683  | 0.47910  | -1.08189 | H    | -5.55064 | -4.67193 | -0.06075 |
| C    | -3.25228 | 3.39404  | -0.60163 | N    | -3.91899 | 4.34858  | -0.56659 |
| C    | -3.59594 | -2.66011 | -0.50877 | N    | -3.72040 | 0.43991  | -2.10736 |
| H    | -3.96967 | -3.37569 | -1.23072 | H    | 0.08377  | 6.55287  | 0.98880  |
| C    | -2.35729 | -2.05728 | -0.72814 |      |          |          |          |

### 3.3. Coordinates of the optimized structure for **7c** calculated at the B3LYP/6-31+G(d, p) level theory

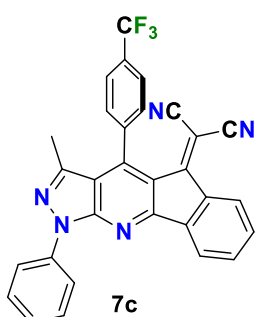

**7c**

SCF Energy: -1726.17280429a. u.  
 Num. Imaginary Frequencies: 0  
 HOMO energy: -0.23934 eV  
 LUMO energy: -0.13124 eV

| Atom | X        | Y        | Z        | Atom | X        | Y        | Z        |
|------|----------|----------|----------|------|----------|----------|----------|
| N    | 2.63874  | 0.49576  | -0.01517 | H    | 3.95812  | 3.00640  | 0.60623  |
| N    | 2.98752  | -1.89033 | -0.15076 | C    | -0.11895 | -3.69977 | -0.11752 |
| N    | 2.20502  | -3.01669 | -0.13722 | H    | -0.64619 | -3.78399 | -1.07254 |
| C    | 0.84973  | -1.19928 | -0.19616 | H    | -0.86788 | -3.49651 | 0.65282  |
| C    | 2.20726  | -0.76868 | -0.15778 | H    | 0.35745  | -4.65925 | 0.09508  |
| C    | 0.25782  | 1.11204  | -0.16780 | C    | -2.43973 | 1.87336  | -1.54294 |
| C    | 1.66198  | 1.38196  | 0.00316  | C    | 2.88199  | 4.86931  | 0.91699  |
| C    | -0.18235 | -0.22389 | -0.18933 | H    | 3.76903  | 5.44273  | 1.16867  |
| C    | 1.83916  | 2.80675  | 0.29413  | C    | -4.25957 | -1.47652 | 0.28883  |
| C    | 4.40393  | -2.02242 | -0.09110 | C    | 6.62353  | -1.17327 | -0.51365 |
| C    | 0.93852  | -2.63892 | -0.15308 | H    | 7.26784  | -0.38608 | -0.89381 |
| C    | -2.33419 | -0.25222 | 1.07950  | C    | 1.62920  | 5.49289  | 0.91824  |
| H    | -1.86228 | 0.36697  | 1.83619  | C    | 0.46462  | 4.78685  | 0.59006  |
| C    | -1.60664 | -0.63875 | -0.05748 | H    | -0.48739 | 5.30011  | 0.60217  |
| C    | -1.65446 | 2.74365  | -0.72427 | C    | 7.17966  | -2.33724 | 0.02206  |
| C    | 0.57097  | 3.42903  | 0.27122  | H    | 8.25765  | -2.45888 | 0.06582  |
| C    | -0.42686 | 2.42391  | -0.18410 | C    | 6.33656  | -3.34589 | 0.49712  |
| C    | -3.65148 | -0.67184 | 1.25674  | H    | 6.75618  | -4.25638 | 0.91444  |
| C    | 4.95124  | -3.19494 | 0.44654  | N    | -2.70926 | 5.11218  | -0.58609 |
| H    | 4.29058  | -3.97256 | 0.80898  | N    | -3.09064 | 1.26880  | -2.29577 |
| C    | 5.23886  | -1.00914 | -0.57948 | H    | 1.55199  | 6.54413  | 1.17779  |
| H    | 4.81231  | -0.10725 | -0.99777 | H    | -4.02988 | -2.45924 | -1.61669 |
| C    | -2.21081 | 4.06135  | -0.64668 | H    | -4.20258 | -0.37184 | 2.14141  |
| C    | -3.54975 | -1.85730 | -0.85327 | C    | -5.66492 | -1.97575 | 0.50370  |
| C    | -2.23108 | -1.44307 | -1.02044 | F    | -6.31555 | -2.20143 | -0.66169 |
| H    | -1.69564 | -1.71485 | -1.92366 | F    | -6.41453 | -1.10589 | 1.22323  |
| C    | 2.99703  | 3.51008  | 0.60312  | F    | -5.67617 | -3.15439 | 1.18869  |

### 3.4. Coordinates of the optimized structure for **7d** calculated at the B3LYP/6-31+G(d, p) level theory

| Atom | X        | Y        | Z        | Atom | X        | Y        | Z        |
|------|----------|----------|----------|------|----------|----------|----------|
| N    | 2.42350  | 0.61107  | -0.01552 | C    | 0.06385  | -3.82151 | 0.00543  |
| N    | 2.98590  | -1.73488 | -0.12002 | H    | -0.43821 | -4.00705 | -0.94904 |
| N    | 2.31170  | -2.92852 | -0.07156 | H    | -0.71408 | -3.64737 | 0.75324  |
| C    | 0.79189  | -1.24355 | -0.15041 | H    | 0.62687  | -4.71819 | 0.27444  |
| C    | 2.10356  | -0.68968 | -0.13753 | C    | -2.76231 | 1.48088  | -1.53558 |
| C    | -0.00441 | 1.00354  | -0.13853 | C    | 2.27363  | 5.01067  | 0.82449  |
| C    | 1.36900  | 1.40340  | 0.00794  | H    | 3.10619  | 5.66809  | 1.05661  |
| C    | -0.33121 | -0.36875 | -0.13230 | C    | -4.35424 | -1.89426 | 0.41893  |
| C    | 1.41934  | 2.84608  | 0.26191  | C    | 6.53601  | -0.68557 | -0.52432 |
| C    | 4.40764  | -1.73496 | -0.07689 | H    | 7.10022  | 0.15793  | -0.91129 |
| C    | 1.01560  | -2.66710 | -0.07676 | C    | 0.96986  | 5.51857  | 0.81572  |
| C    | -2.50453 | -0.45211 | 1.10261  | C    | -0.12711 | 4.70151  | 0.51118  |
| H    | -2.10515 | 0.27010  | 1.80925  | H    | -1.12170 | 5.12666  | 0.51204  |
| C    | -1.70818 | -0.88368 | 0.02791  | C    | 7.20402  | -1.79260 | 0.00430  |
| C    | -2.05287 | 2.43957  | -0.74533 | H    | 8.28914  | -1.81411 | 0.03578  |
| C    | 0.10027  | 3.35092  | 0.22871  | C    | 6.46237  | -2.87402 | 0.48851  |
| C    | -0.80379 | 2.24450  | -0.19231 | H    | 6.96861  | -3.74188 | 0.90092  |
| C    | -3.78844 | -0.94304 | 1.30456  | N    | -3.31040 | 4.71023  | -0.68466 |
| H    | -4.35079 | -0.58046 | 2.15571  | N    | -3.37238 | 0.82029  | -2.27582 |
| C    | 5.06858  | -2.85141 | 0.45378  | H    | 0.79868  | 6.56527  | 1.04764  |
| H    | 4.48654  | -3.68622 | 0.82352  | N    | -5.62777 | -2.39295 | 0.61388  |
| C    | 5.14143  | -0.64951 | -0.57391 | C    | -6.48526 | -1.80384 | 1.63232  |
| H    | 4.62853  | 0.20963  | -0.98476 | H    | -6.69844 | -0.74155 | 1.43956  |
| C    | -2.72027 | 3.70603  | -0.71176 | H    | -7.43222 | -2.34421 | 1.65638  |
| C    | -3.55505 | -2.31277 | -0.67410 | H    | -6.03176 | -1.88819 | 2.62655  |
| H    | -3.94747 | -3.00383 | -1.40905 | C    | -6.23972 | -3.22897 | -0.40970 |
| C    | -2.26858 | -1.82462 | -0.85006 | H    | -6.35954 | -2.70075 | -1.36733 |
| H    | -1.70580 | -2.14464 | -1.72116 | H    | -5.64511 | -4.13231 | -0.58739 |
| C    | 2.50970  | 3.65929  | 0.54540  | H    | -7.22537 | -3.54600 | -0.06717 |
| H    | 3.51233  | 3.24440  | 0.55627  |      |          |          |          |

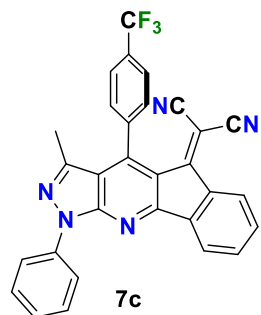

SCF Energy: -1523.09554001 a. u.  
 Num. Imaginary Frequencies: 0  
 HOMO energy: -0.20749 eV  
 LUMO energy: -0.11791 eV

## 6. Fluorescent chemosensors **7a-d** for detection of cyanide

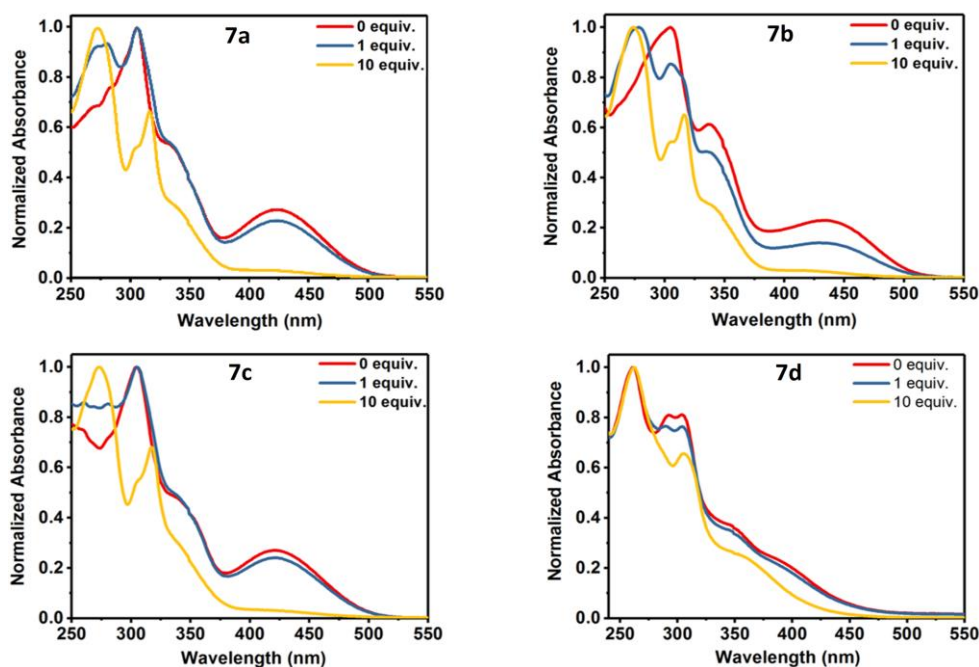

**Fig. S10.** Normalized UV-vis spectra of 50  $\mu\text{M}$  acetonitrile solutions of **7a-d** with different equiv of  $\text{CN}^-$

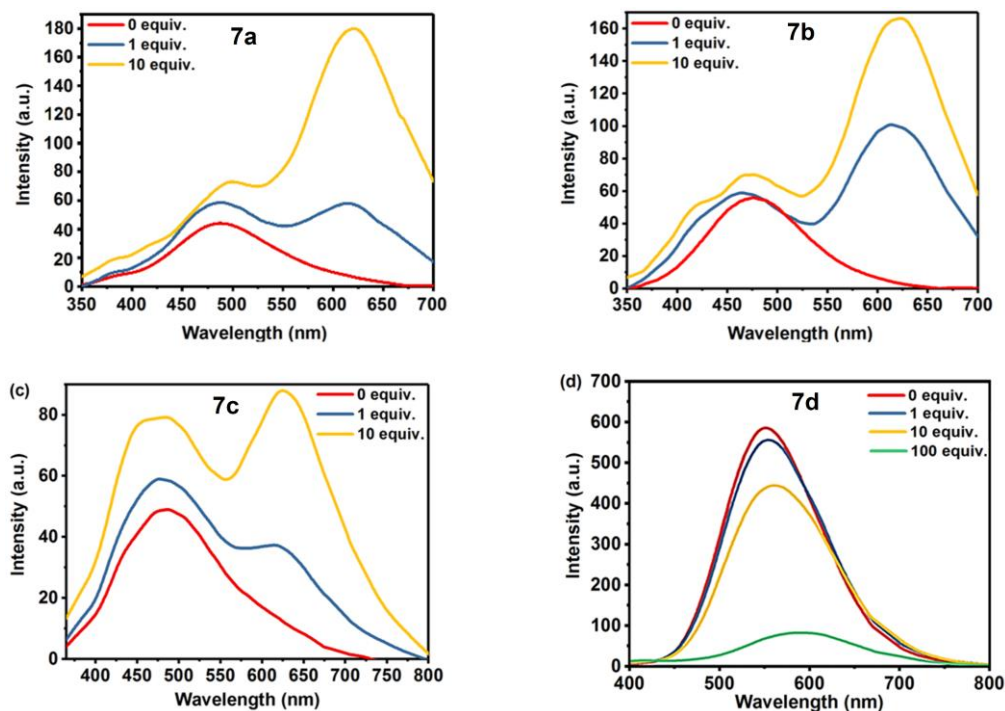

**Fig. S11.** Fluorescence spectra of 50  $\mu\text{M}$  acetonitrile solutions of **7a-d** with different equiv of  $\text{CN}^-$

**Table S3.** Photophysical properties of compounds **7a-d** with different equivalents of  $\text{CN}^-$

| Compound <sup>a</sup> | Equiv $\text{CN}^-$ | $\lambda_{\text{ab}}$ (nm) | $\lambda_{\text{ex}}$ (nm) | $\lambda_{\text{em}}$ (nm) | Stokes shift (nm) | $\phi_{\text{F}}$ <sup>b</sup> |
|-----------------------|---------------------|----------------------------|----------------------------|----------------------------|-------------------|--------------------------------|
| <b>7a</b>             | 0                   | 306                        |                            | 488                        | 182               | 0.011                          |
|                       | 1                   | 306                        | 340                        | 489                        | 183               | 0.026                          |
|                       | 10                  | 272                        |                            | 621                        | 349               | 0.073                          |
| <b>7b</b>             | 0                   | 305                        |                            | 480                        | 175               | 0.013                          |
|                       | 1                   | 278                        | 340                        | 613                        | 335               | 0.041                          |
|                       | 10                  | 274                        |                            | 623                        | 349               | 0.079                          |
| <b>7c</b>             | 0                   | 305                        |                            | 486                        | 181               | 0.015                          |
|                       | 1                   | 305                        | 345                        | 477                        | 172               | 0.027                          |
|                       | 10                  | 273                        |                            | 625                        | 352               | 0.063                          |
| <b>7d</b>             | 0                   | 260                        |                            | 550                        | 290               | 0.181                          |
|                       | 1                   | 260                        |                            | 555                        | 295               | 0.166                          |
|                       | 10                  | 260                        | 345                        | 560                        | 300               | 0.161                          |
|                       | 100                 | 260                        |                            | 585                        | 325               | 0.023                          |

<sup>a</sup>50  $\mu\text{M}$ . <sup>b</sup>Relative quantum yields were taken by using quinine sulfate as a reference ( $\phi_{\text{F}} = 0.59$  in 0.15 M  $\text{HClO}_4$ ).



## 7. Copies of NMR spectra

$^1\text{H}$  and  $^{13}\text{C}\{^1\text{H}\}$  NMR spectra of 3-methyl-1,4-diphenylindeno[1,2-*b*]pyrazolo[4,3-*e*]pyridin-5(1*H*)-one (4a)

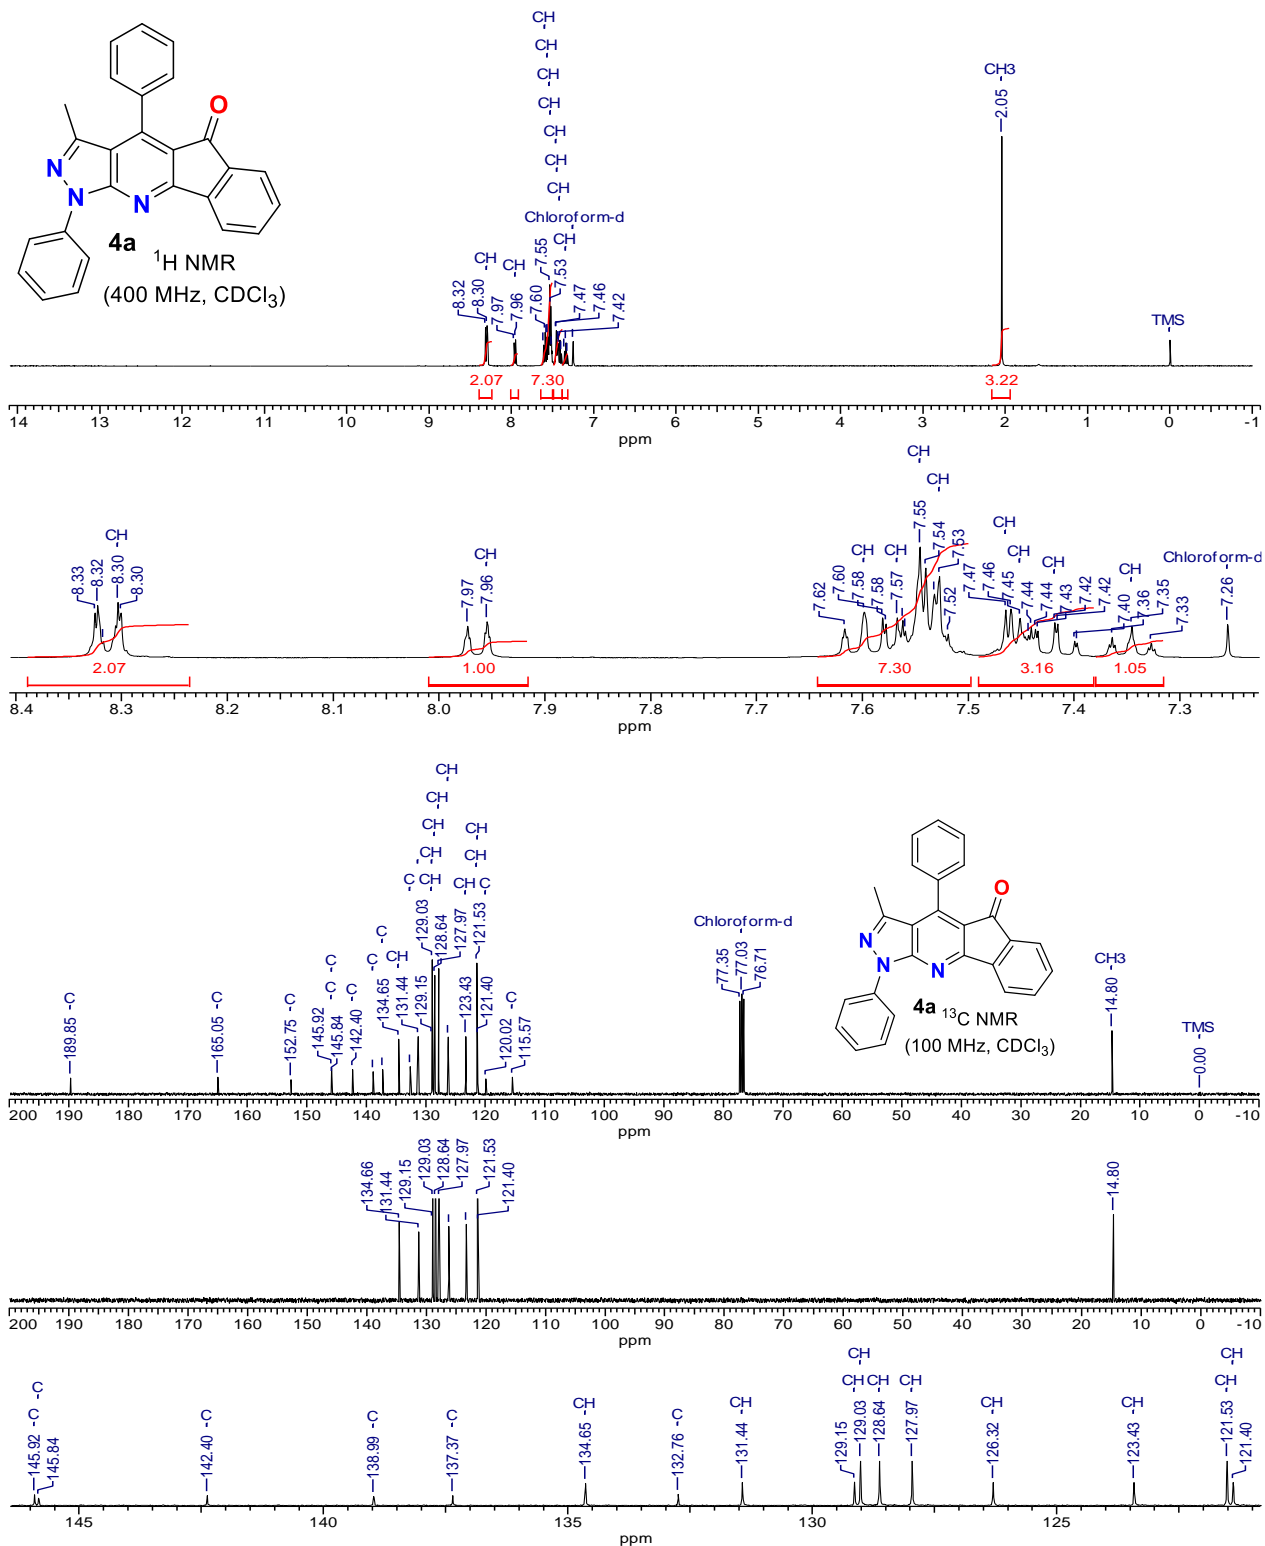



$^1\text{H}$  and  $^{13}\text{C}\{^1\text{H}\}$  NMR spectra of 3-methyl-1-phenyl-4-(4-(trifluoromethyl)phenyl)indeno[1,2-*b*]pyrazolo[4,3-*e*]pyridin-5(1*H*)-one (**4c**)

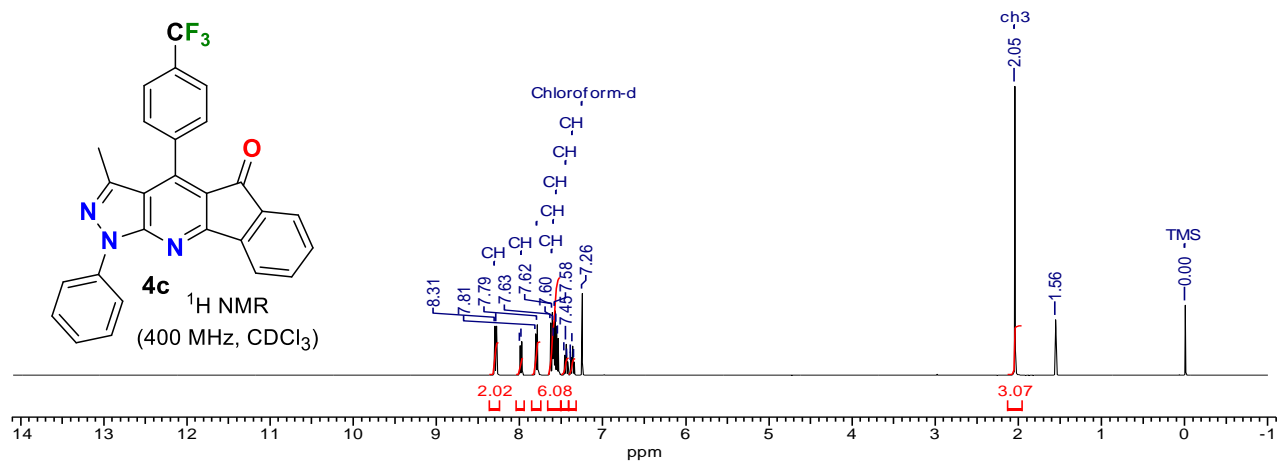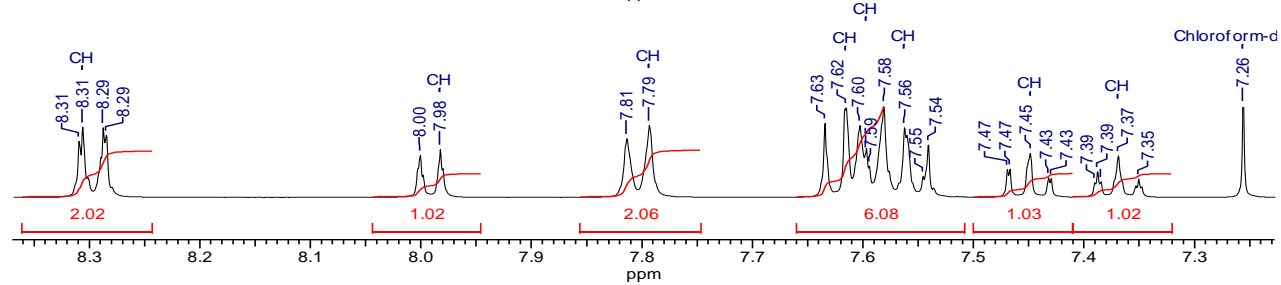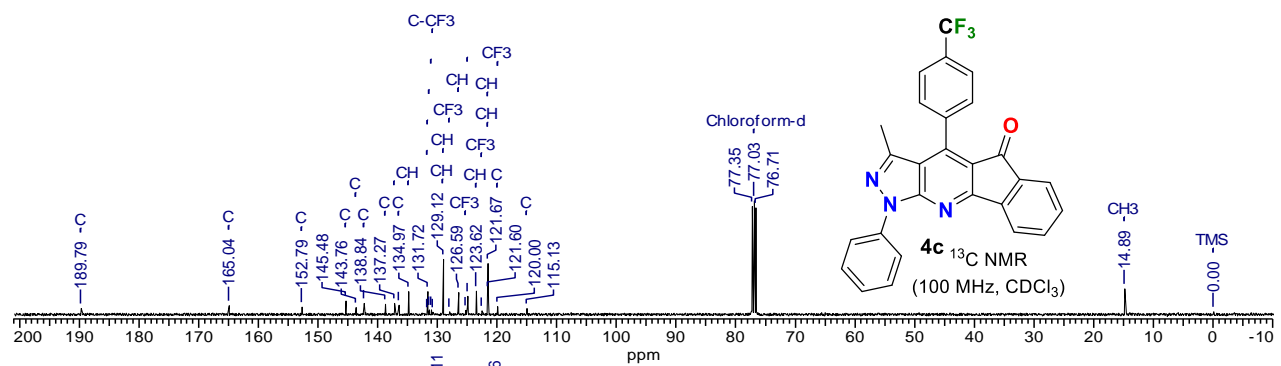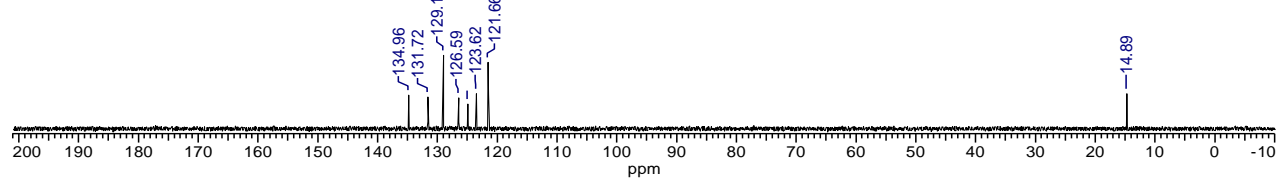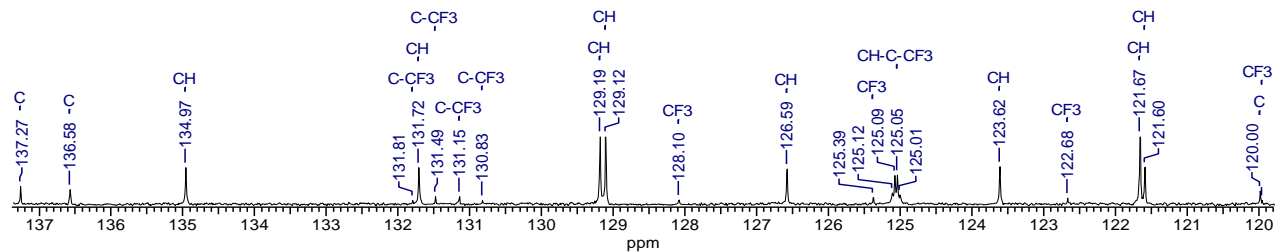

$^1\text{H}$  and  $^{13}\text{C}\{^1\text{H}\}$  NMR spectra of 4-(4-(dimethylamino)phenyl)-3-methyl-1-phenylindeno[1,2-*b*]pyrazolo[4,3-*e*]pyridin-5(1*H*)-one (**4d**)

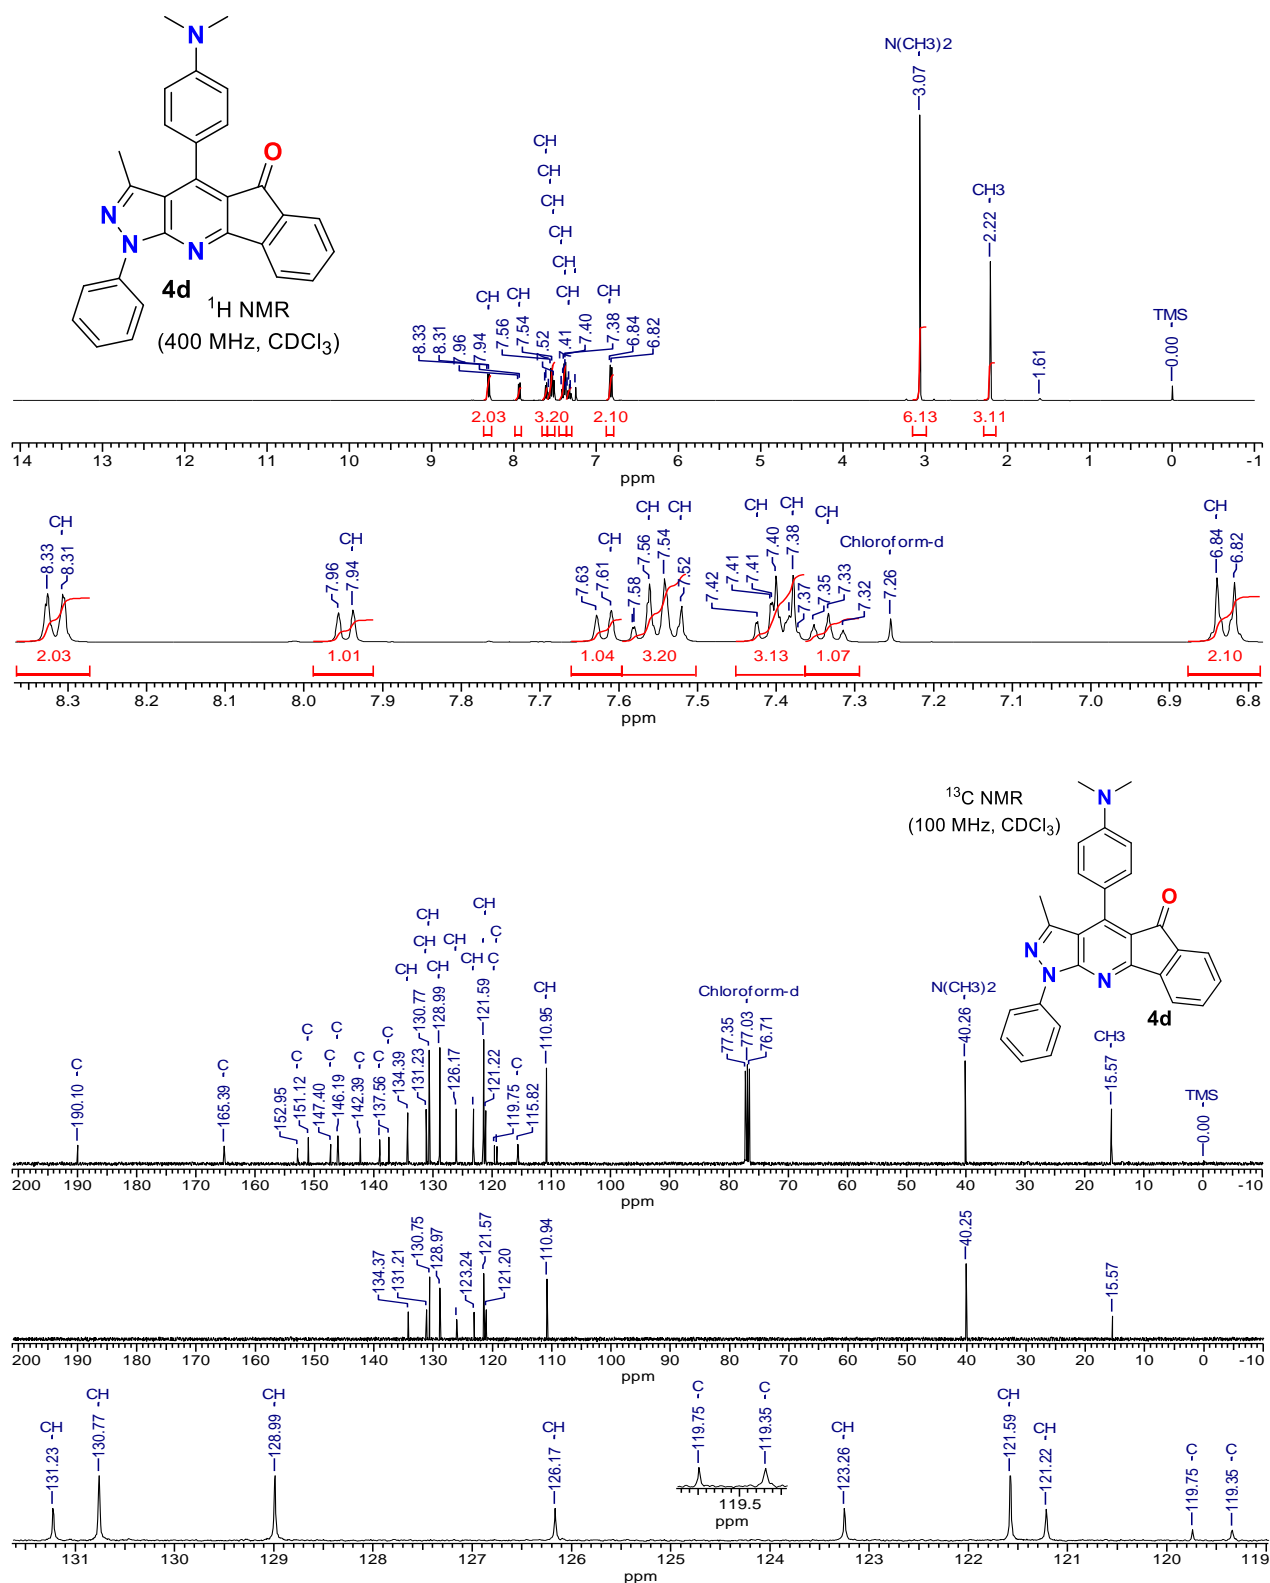



$^1\text{H}$  and  $^{13}\text{C}\{^1\text{H}\}$  NMR spectra of 4-(4-chlorophenyl)-3-methyl-1-phenylindeno[1,2-*b*]pyrazolo[4,3-*e*]pyridin-5(1*H*)-one (**4f**)

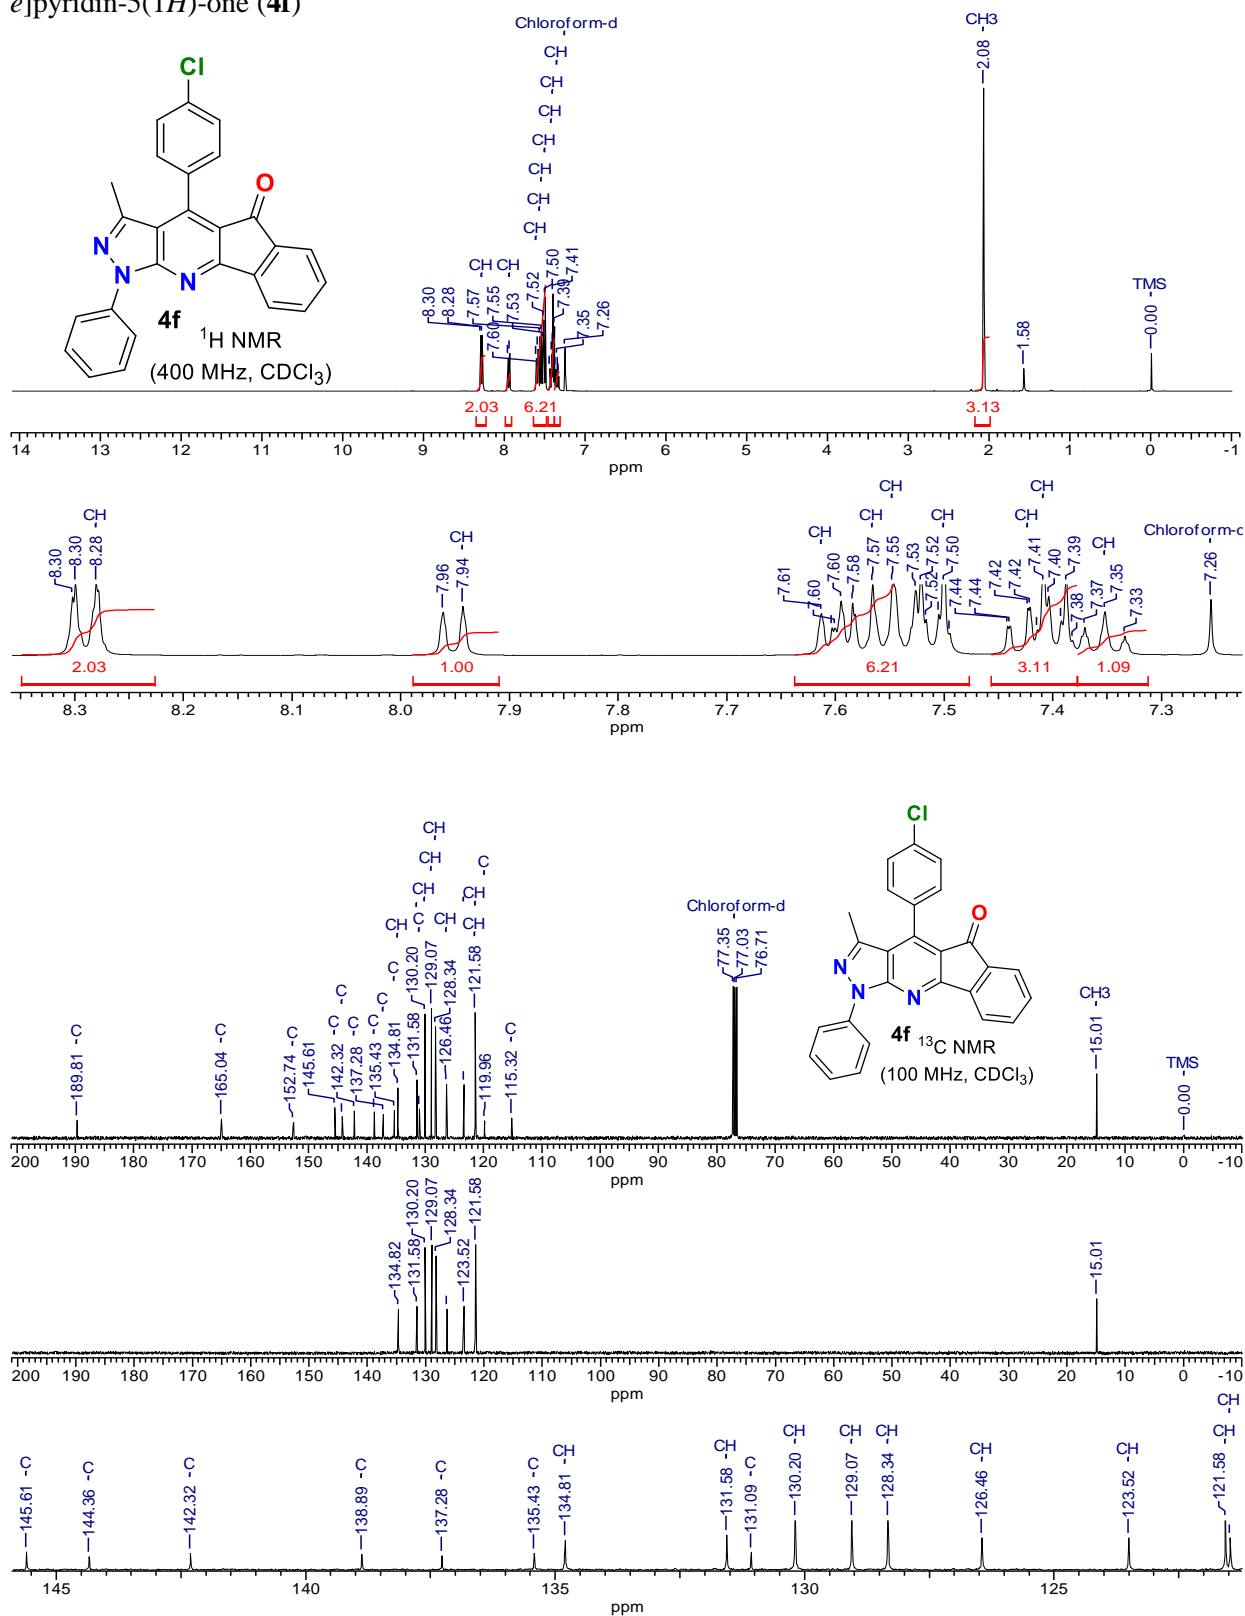

$^1\text{H}$  and  $^{13}\text{C}\{^1\text{H}\}$  NMR spectra of 4-(4-bromophenyl)-3-methyl-1-phenylindeno[1,2-*b*]pyrazolo[4,3-*e*]pyridin-5(1*H*)-one (**4g**)

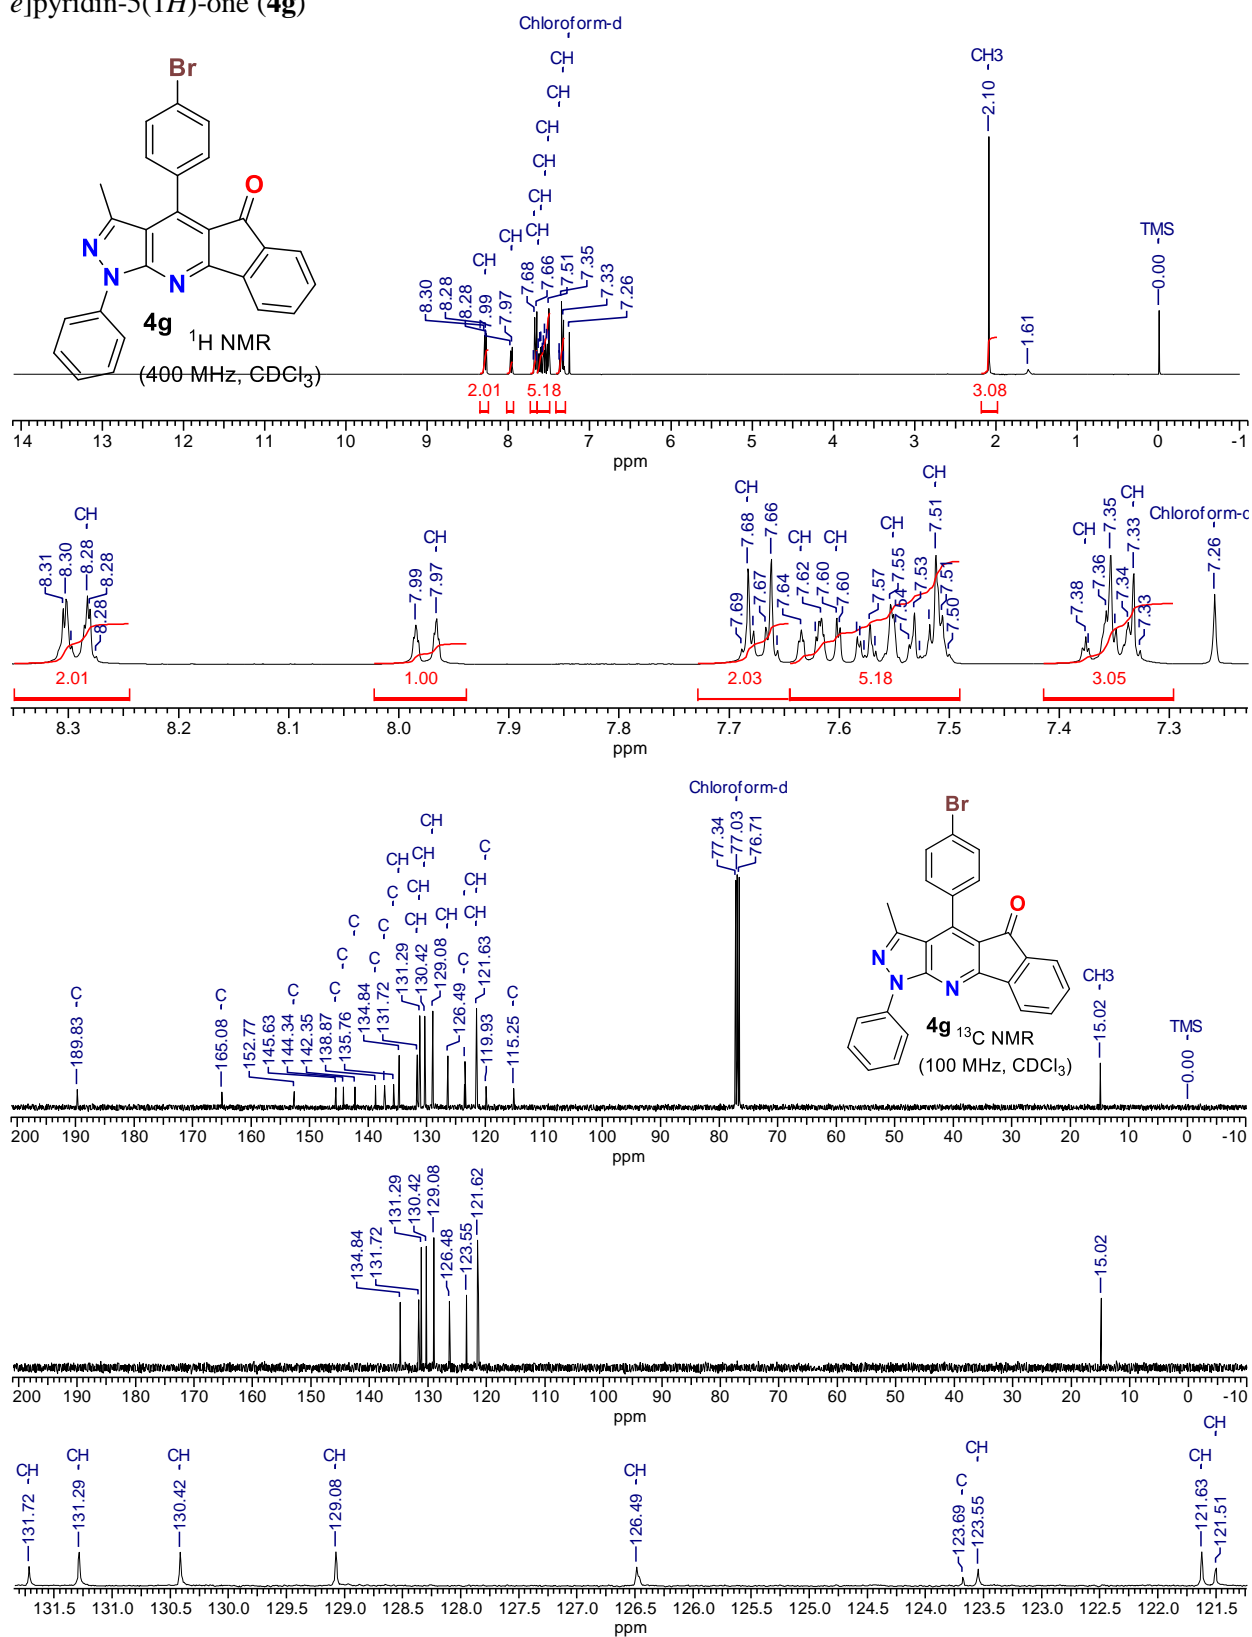

$^1\text{H}$  and  $^{13}\text{C}\{^1\text{H}\}$  NMR spectra of 3-methyl-4-(4-nitrophenyl)-1-phenylindeno[1,2-*b*]pyrazolo[4,3-*e*]pyridin-5(1*H*)-one (**4h**)

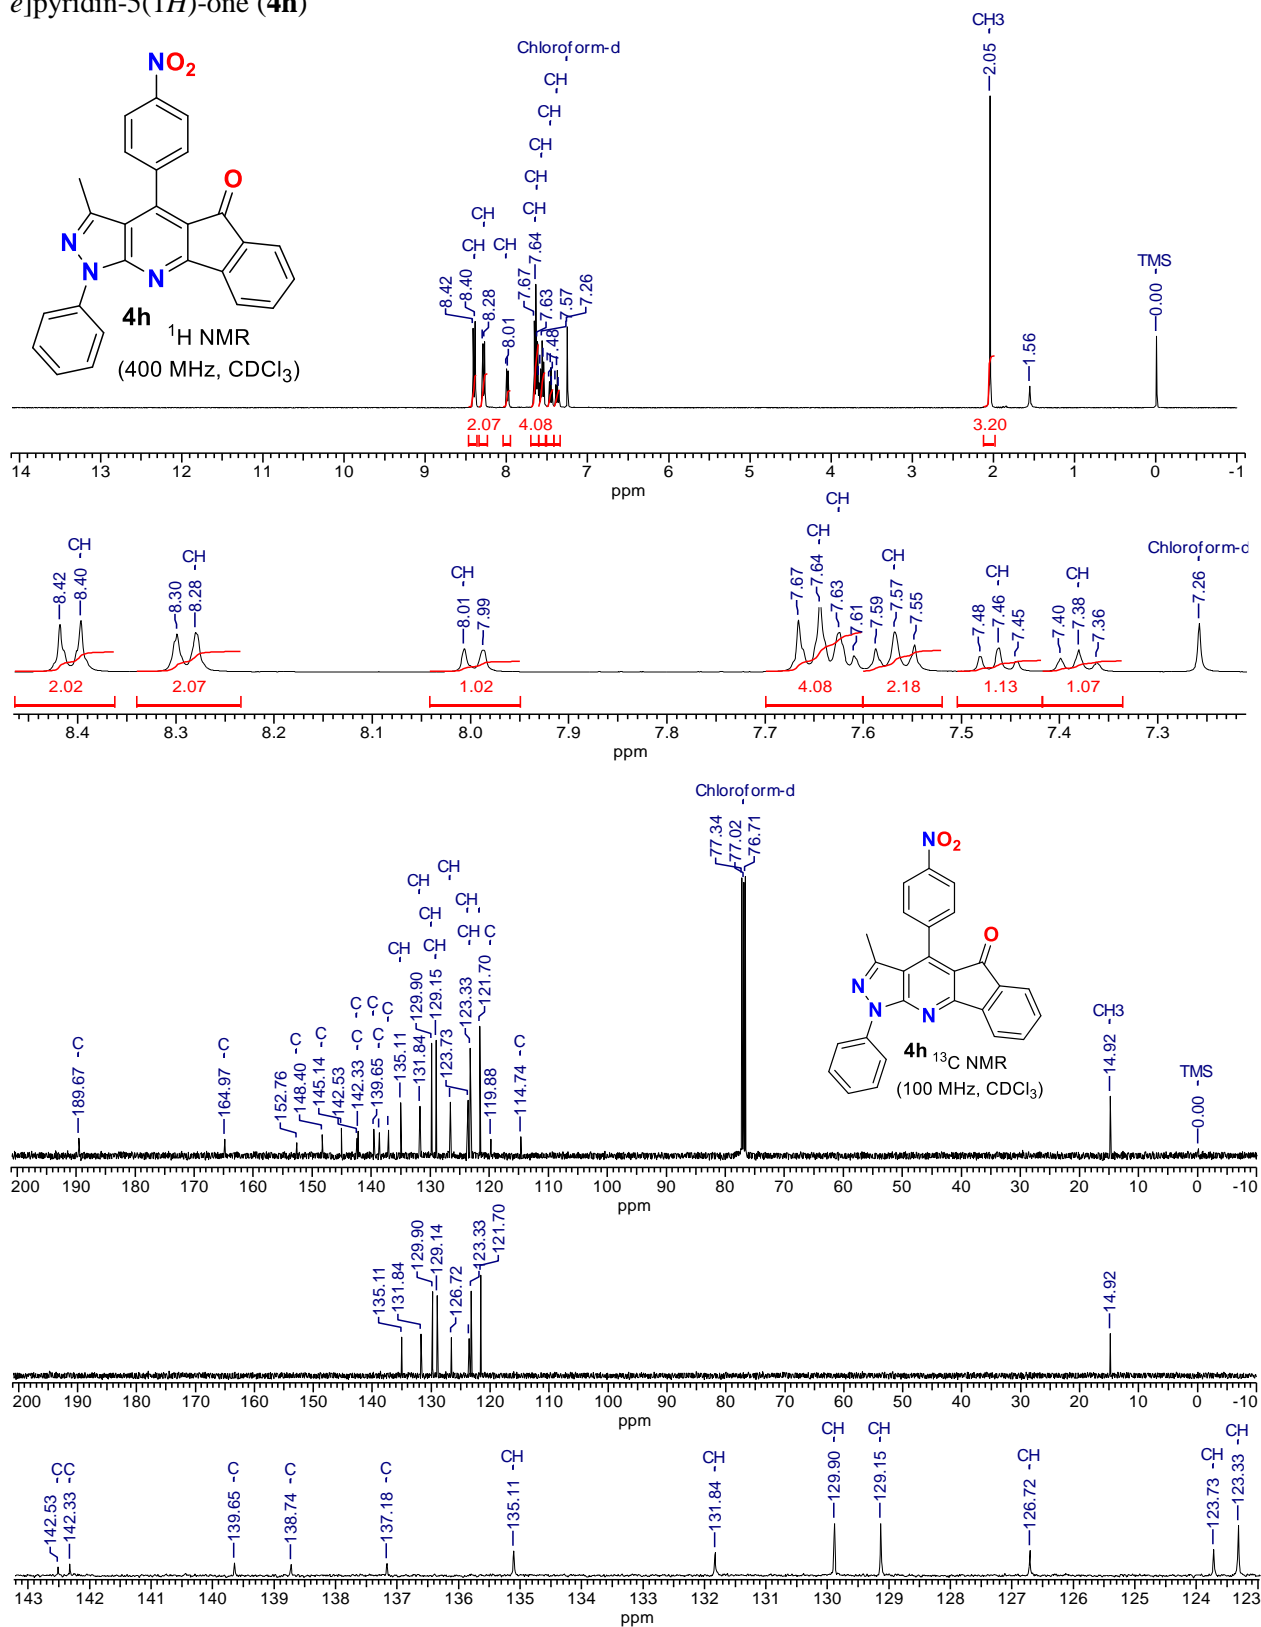



$^1\text{H}$  and  $^{13}\text{C}\{^1\text{H}\}$  NMR spectra of 4-(4-(dimethylamino)phenyl)-3-methyl-1-phenylindeno[1,2-*b*]pyrazolo[4,3-*e*]pyridin-5(1*H*)-one (**4i**)

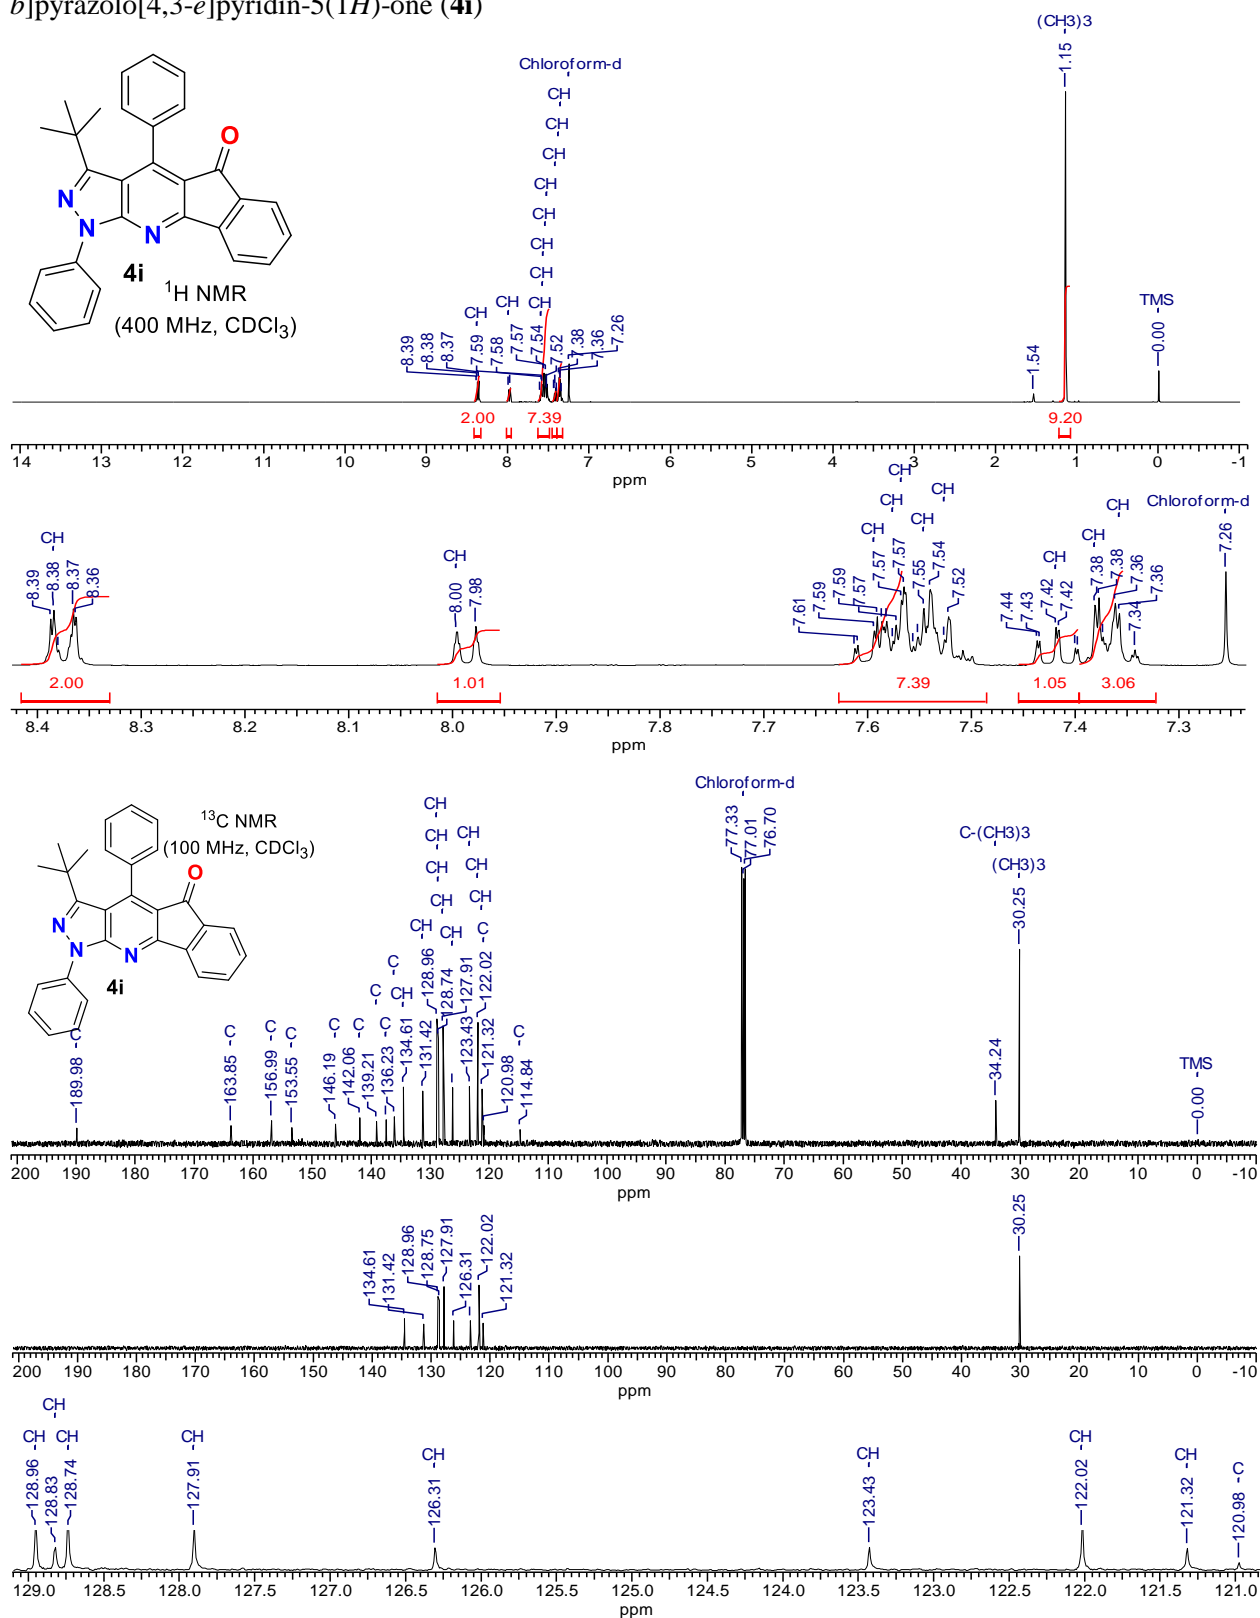

$^1\text{H}$  and  $^{13}\text{C}\{^1\text{H}\}$  NMR spectra of 3-(*tert*-butyl)-1-phenyl-4-(*p*-tolyl)indeno[1,2-*b*]pyrazolo[4,3-*e*]pyridin-5(*1H*)-one (**4j**)

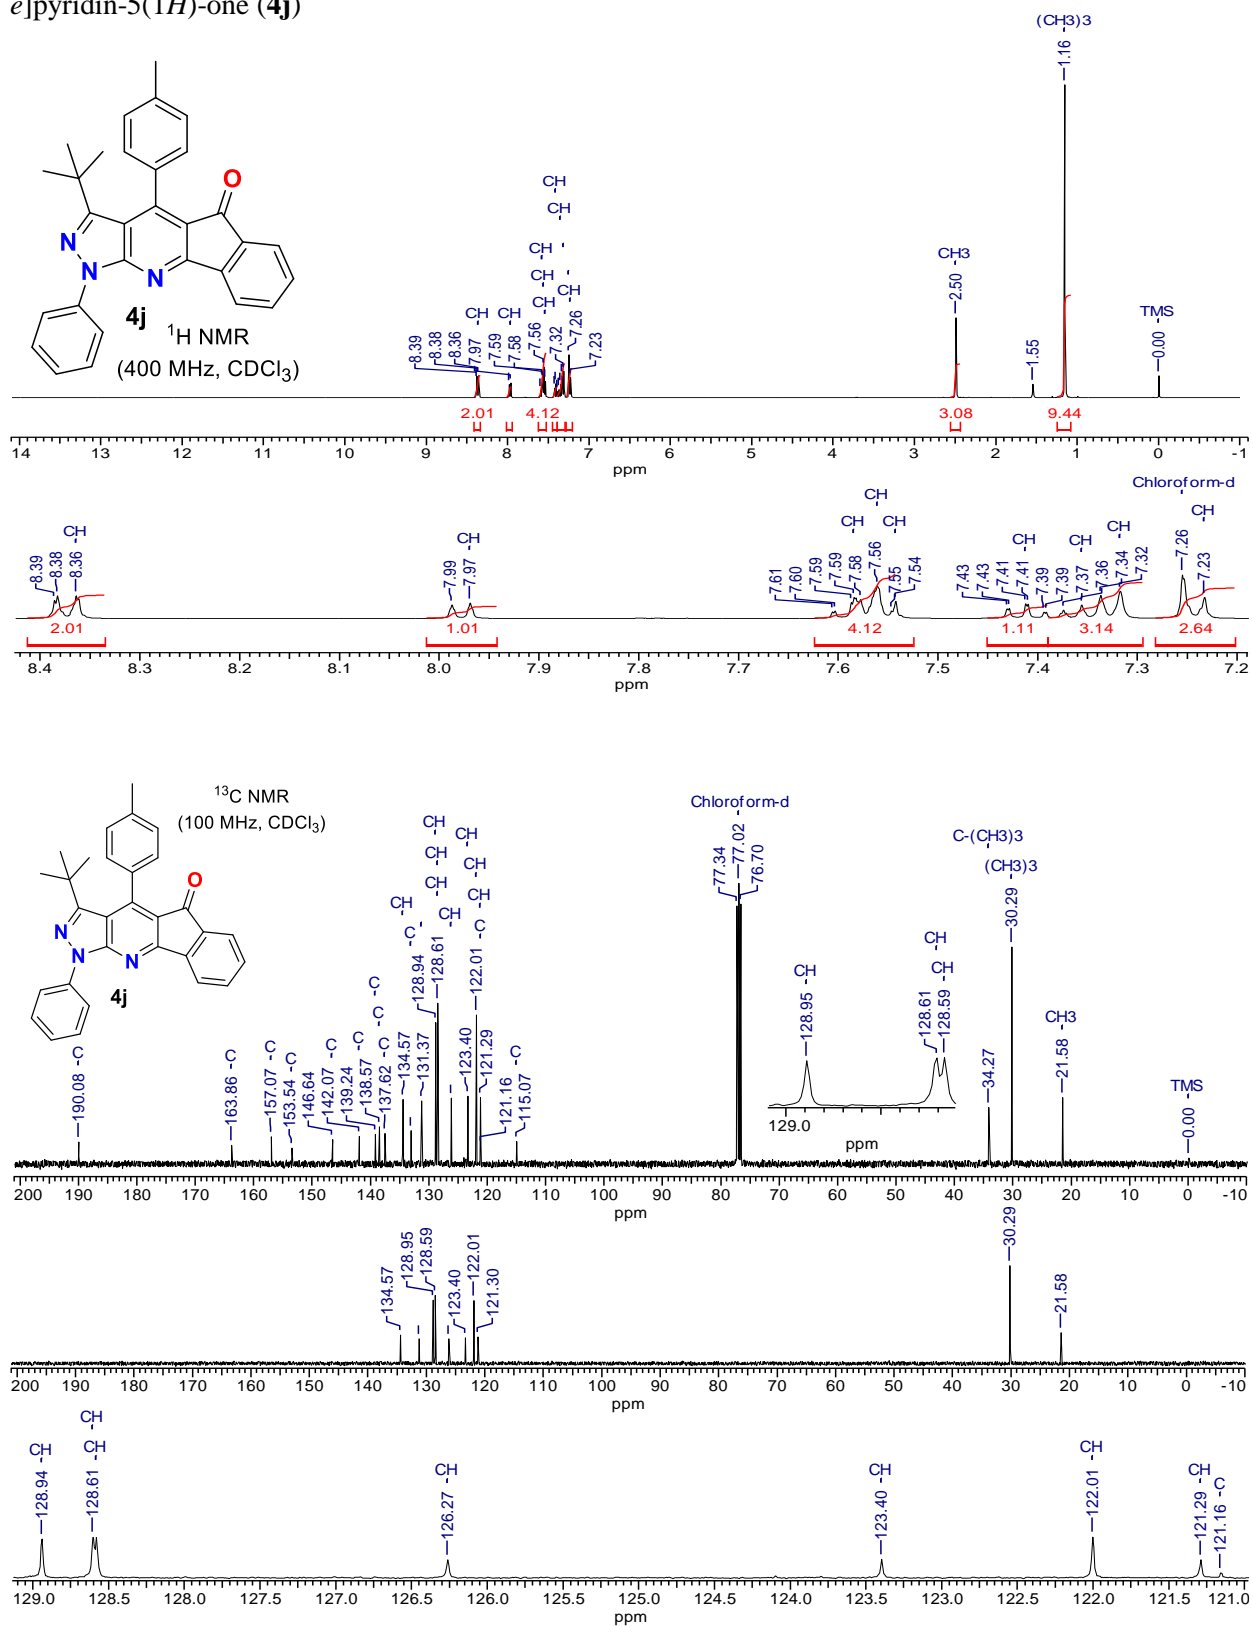

$^1\text{H}$  and  $^{13}\text{C}\{^1\text{H}\}$  NMR spectra of 3-(*tert*-butyl)-4-(4-chlorophenyl)-1-phenylindeno[1,2-*b*]pyrazolo[4,3-*e*]pyridin-5(*1H*)-one (**4k**)

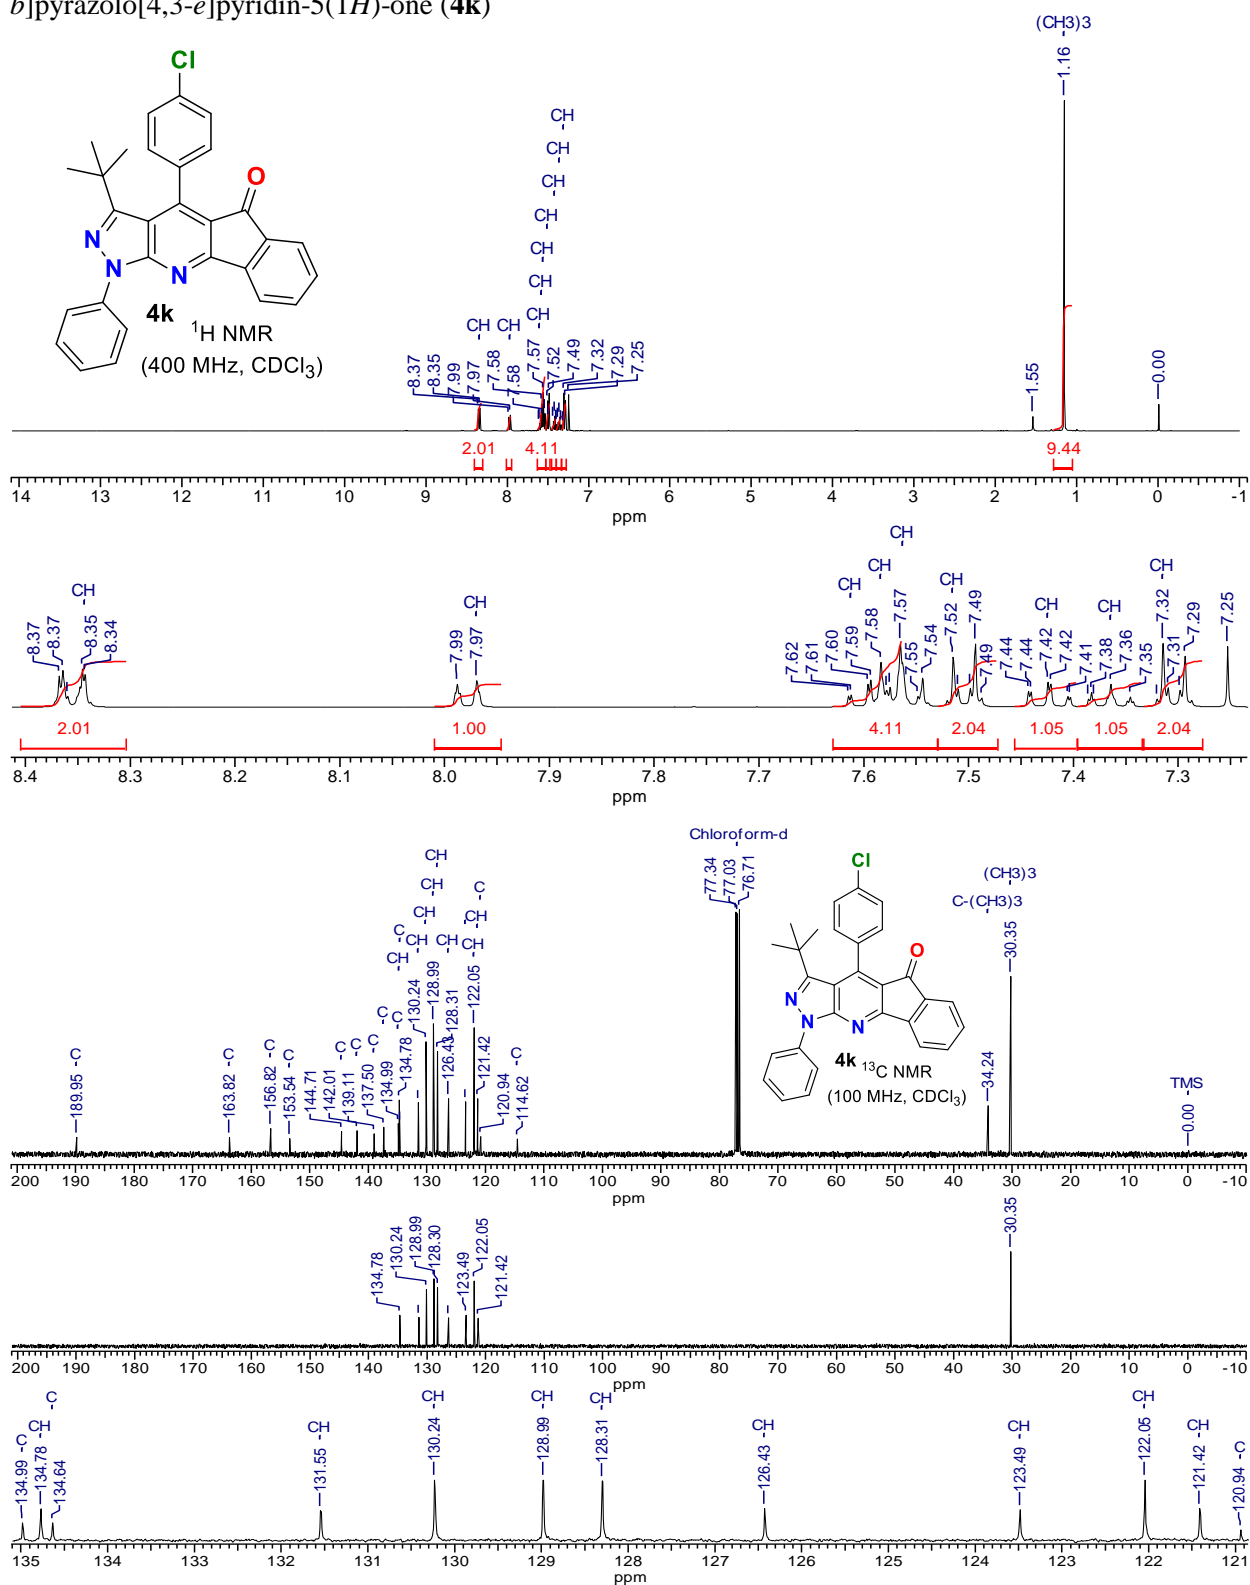

$^1\text{H}$  and  $^{13}\text{C}\{^1\text{H}\}$  NMR spectra of 4-(4-bromophenyl)-3-(*tert*-butyl)-1-phenylindeno[1,2-*b*]pyrazolo[4,3-*e*]pyridin-5(1*H*)-one (**4I**)

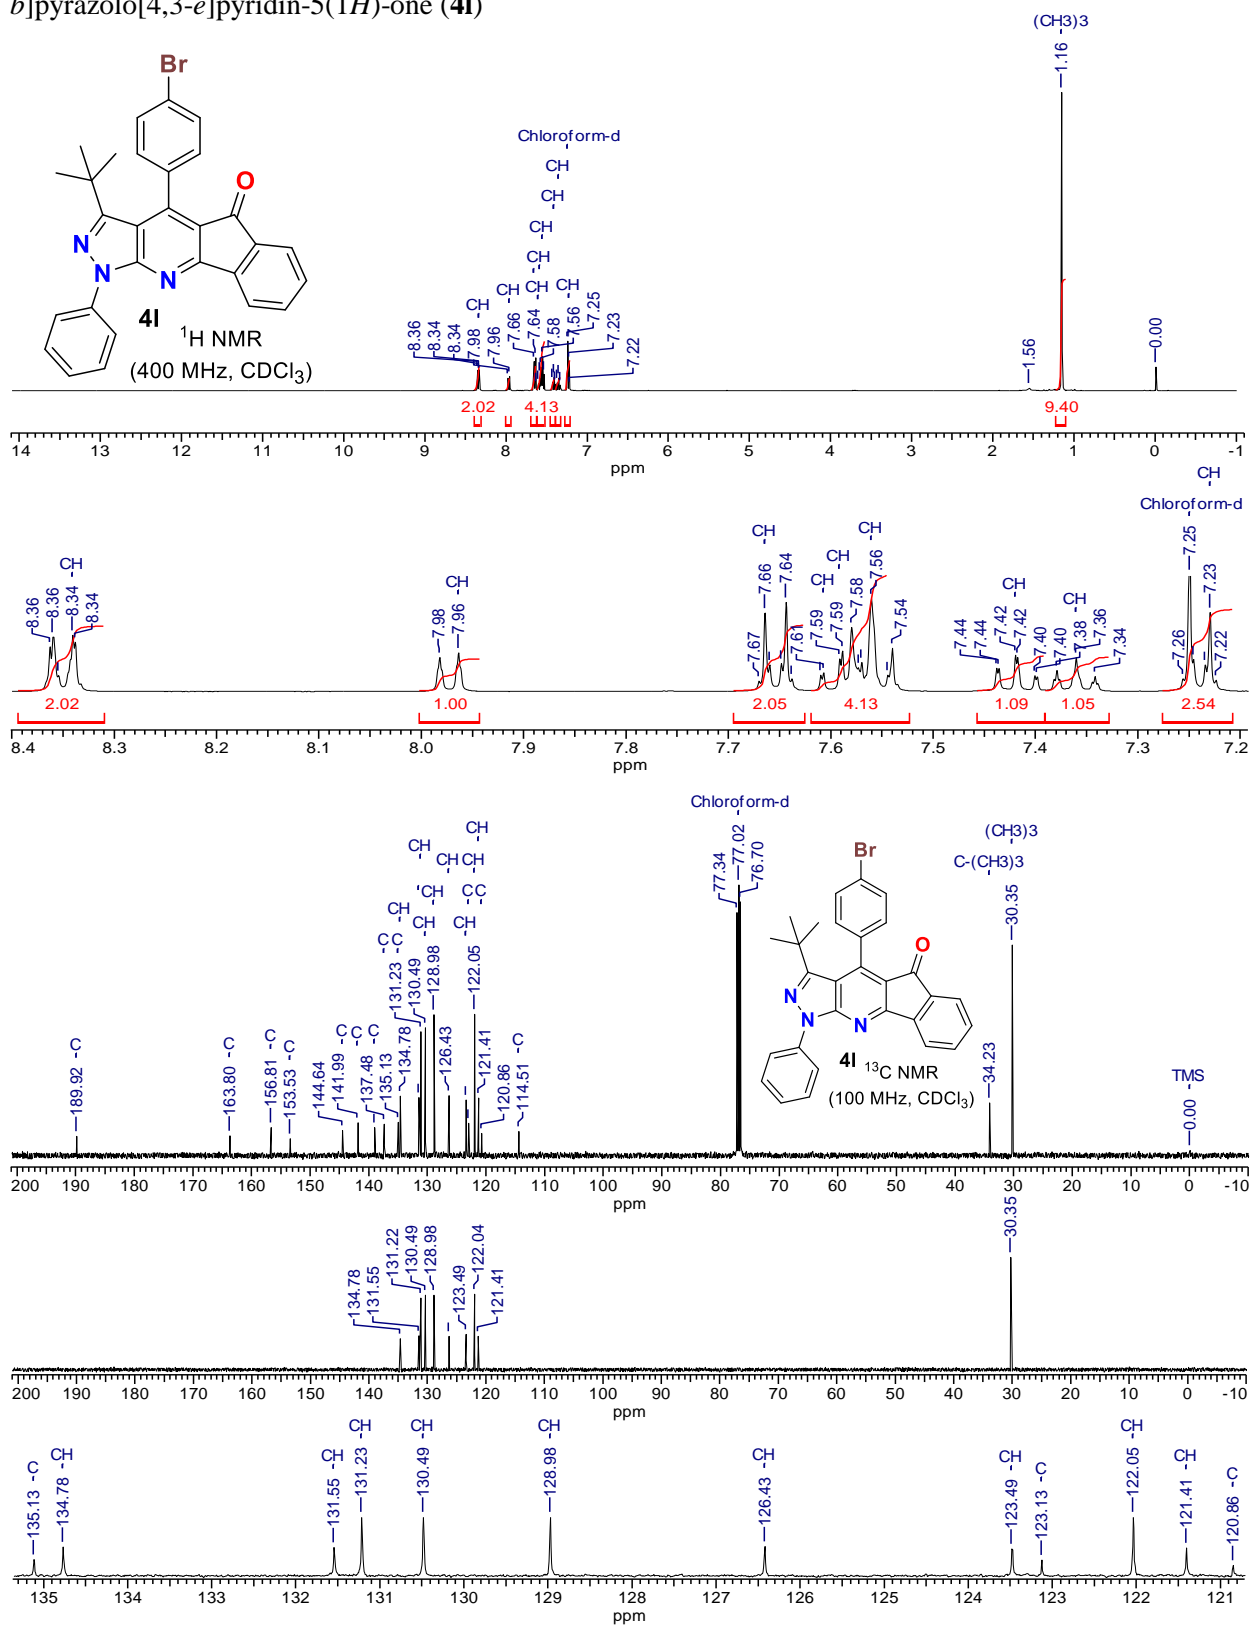

$^1\text{H}$  and  $^{13}\text{C}\{^1\text{H}\}$  NMR spectra of 3-(*tert*-butyl)-1-phenyl-4-(4-(trifluoromethyl)phenyl)indeno[1,2-*b*]pyrazolo[4,3-*e*]pyridin-5(1*H*)-one (**4m**)

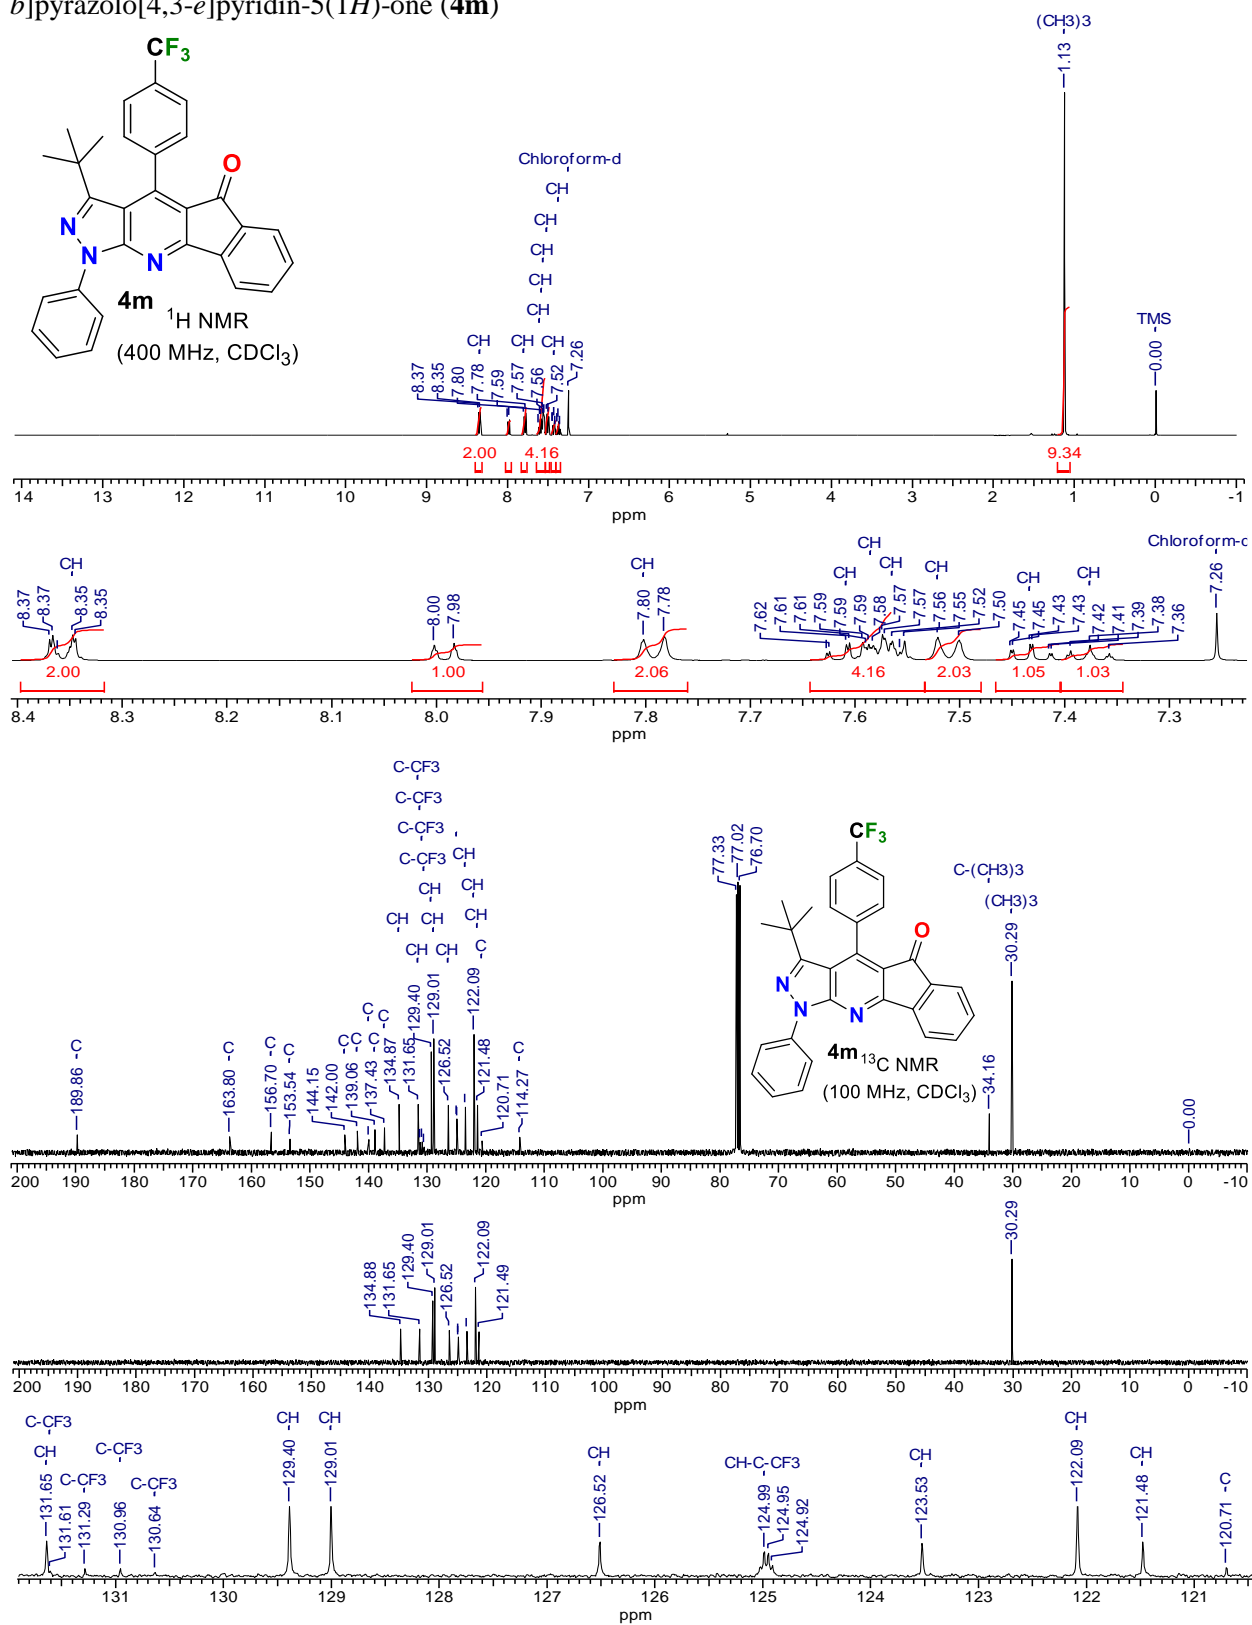

$^1\text{H}$  and  $^{13}\text{C}\{^1\text{H}\}$  NMR spectra of 3-(*tert*-butyl)-4-(4-methoxyphenyl)-1-phenylindeno[1,2-*b*]pyrazolo[4,3-*e*]pyridin-5(1*H*)-one (**4n**)

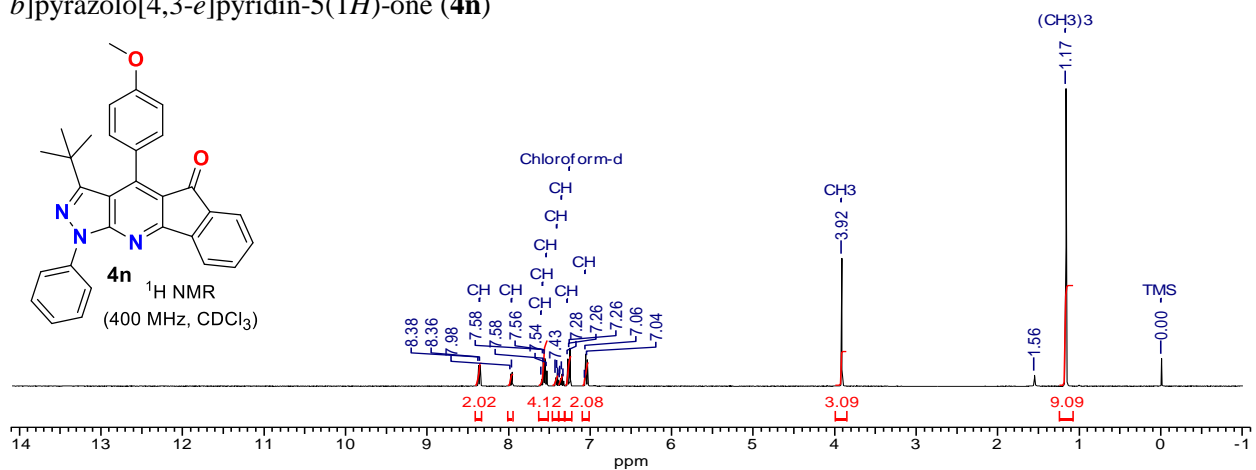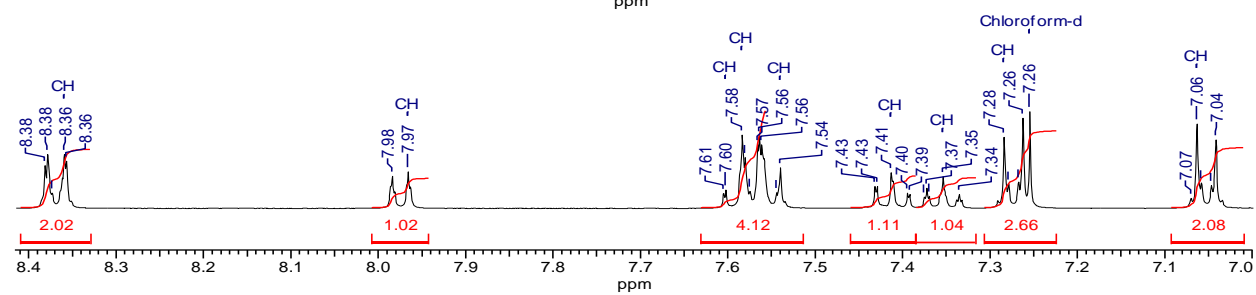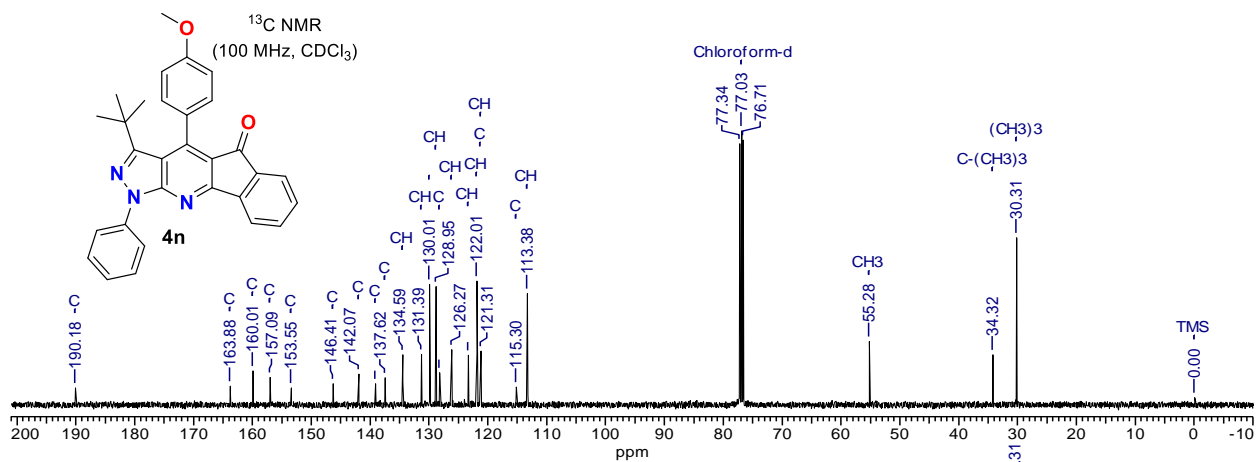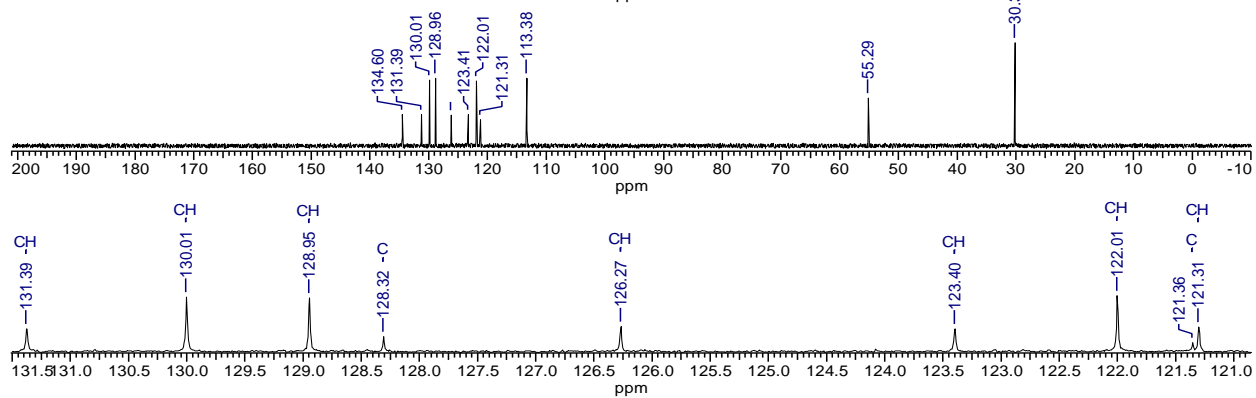

$^1\text{H}$  and  $^{13}\text{C}\{^1\text{H}\}$  NMR spectra of 3-(*tert*-butyl)-4-(4-nitrophenyl)-1-phenylindeno[1,2-*b*]pyrazolo[4,3-*e*]pyridin-5(*1H*)-one (**4o**)

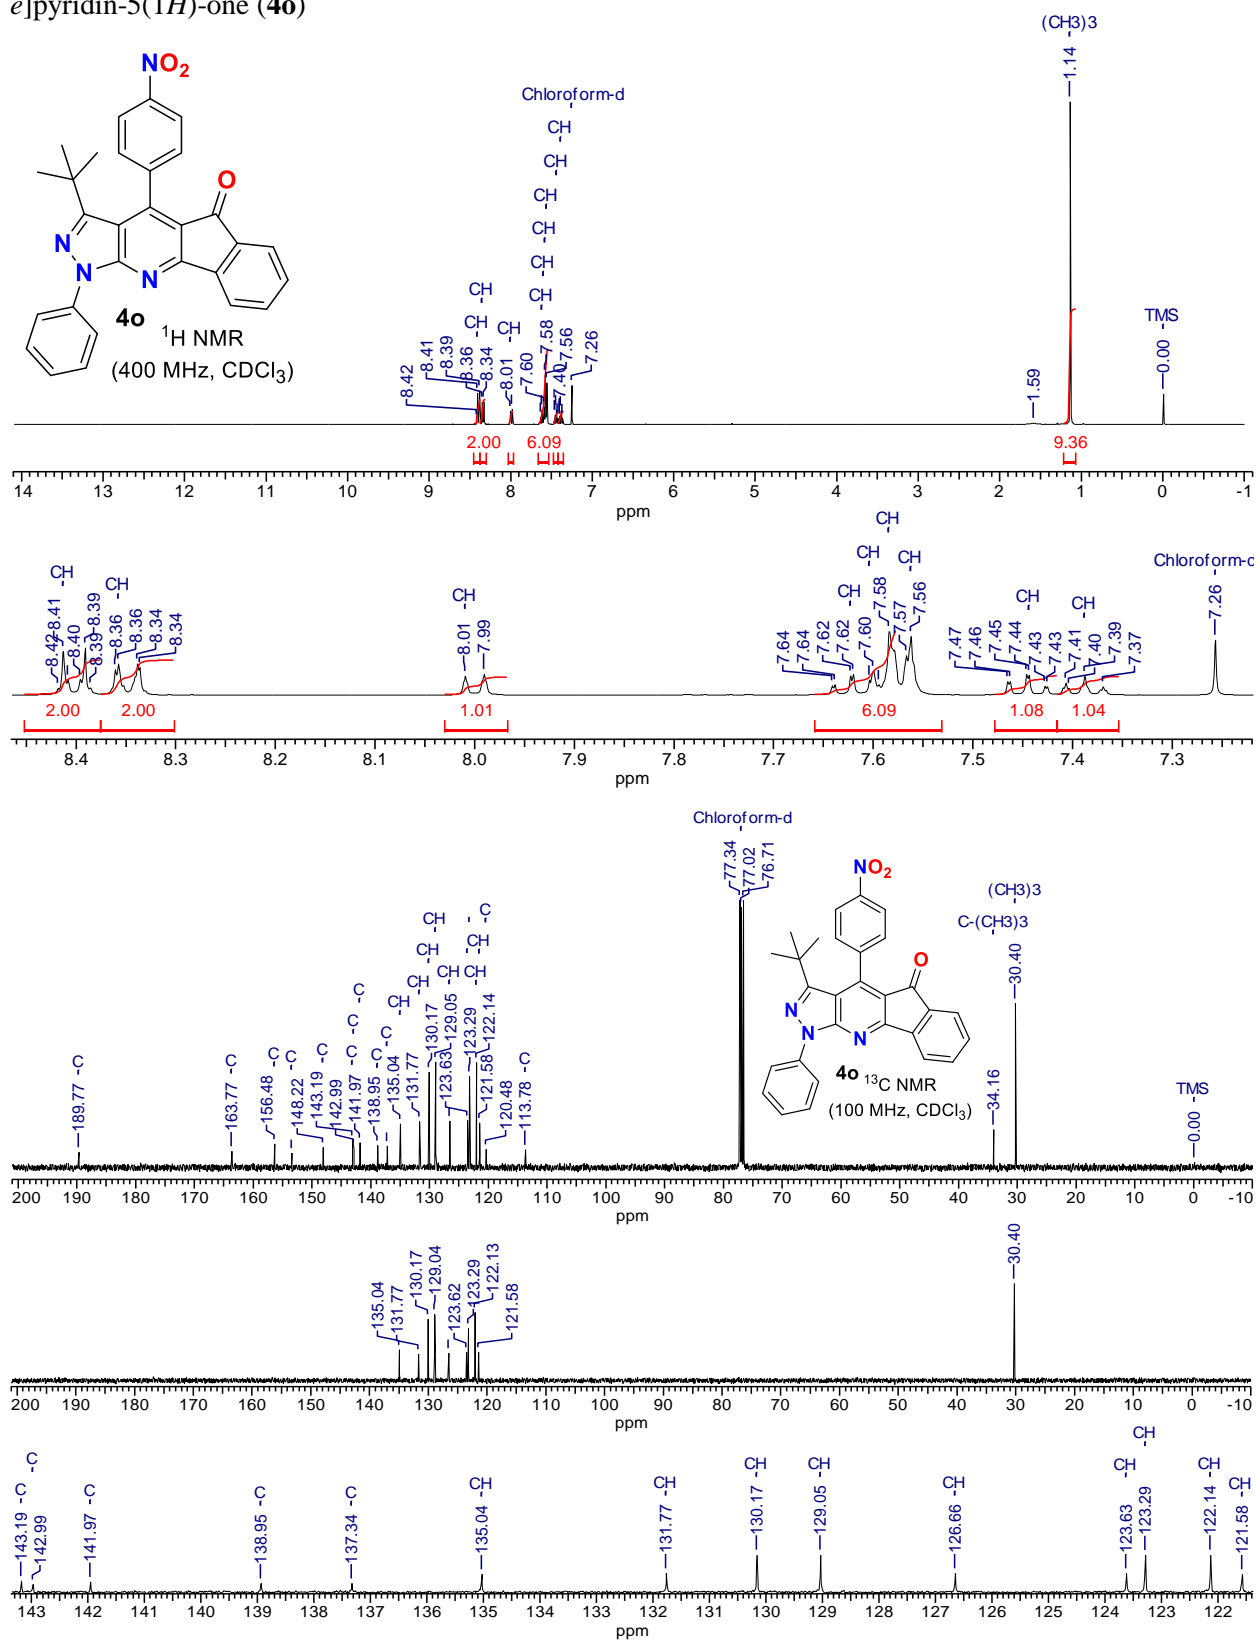

$^1\text{H}$  and  $^{13}\text{C}\{^1\text{H}\}$  NMR spectra of 3-(*tert*-Butyl)-1-(4-chlorophenyl)-4-phenylindeno[1,2-*b*]pyrazolo[4,3-*e*]pyridin-5(*1H*)-one (**4p**)

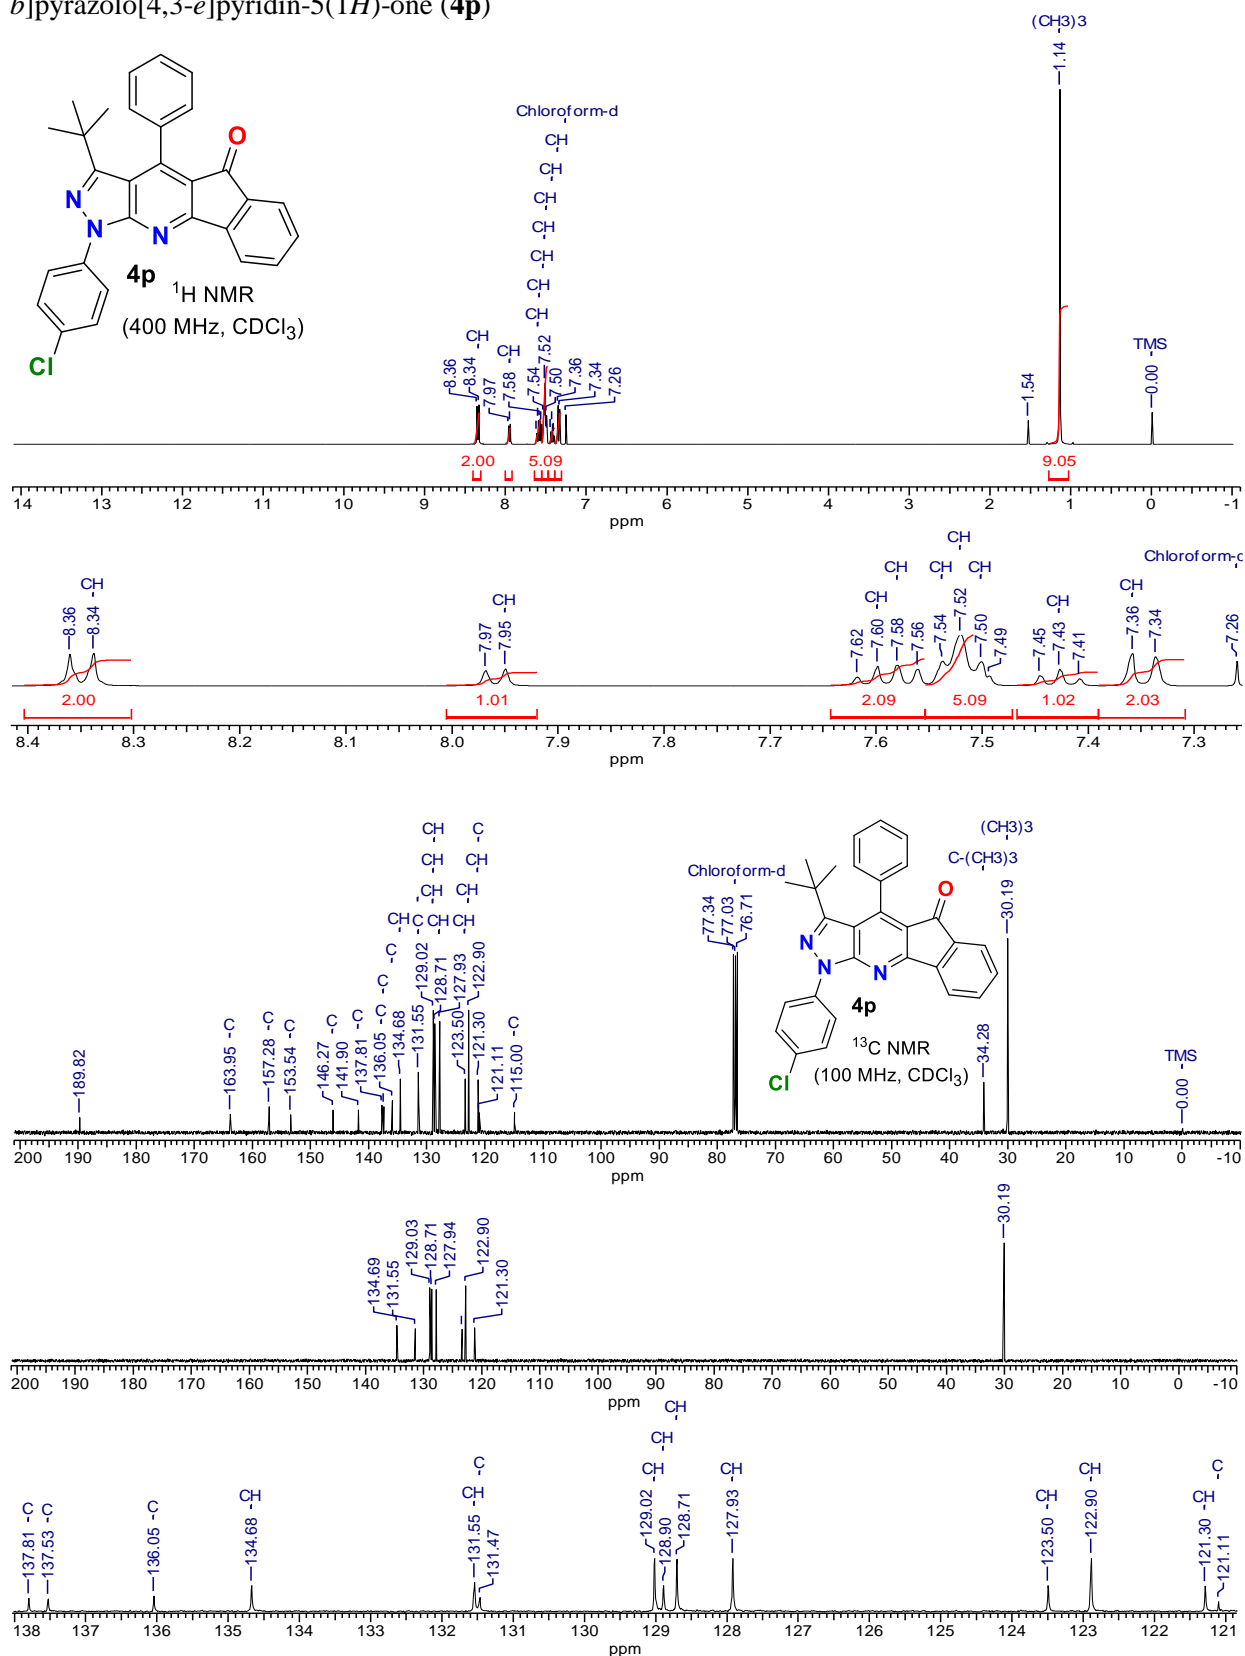



$^1\text{H}$  and  $^{13}\text{C}\{^1\text{H}\}$  NMR spectra of 3-(*tert*-butyl)-1-(4-chlorophenyl)-4-(*p*-tolyl)indeno[1,2-*b*]pyrazolo[4,3-*e*]pyridin-5(*1H*)-one (**4q**)

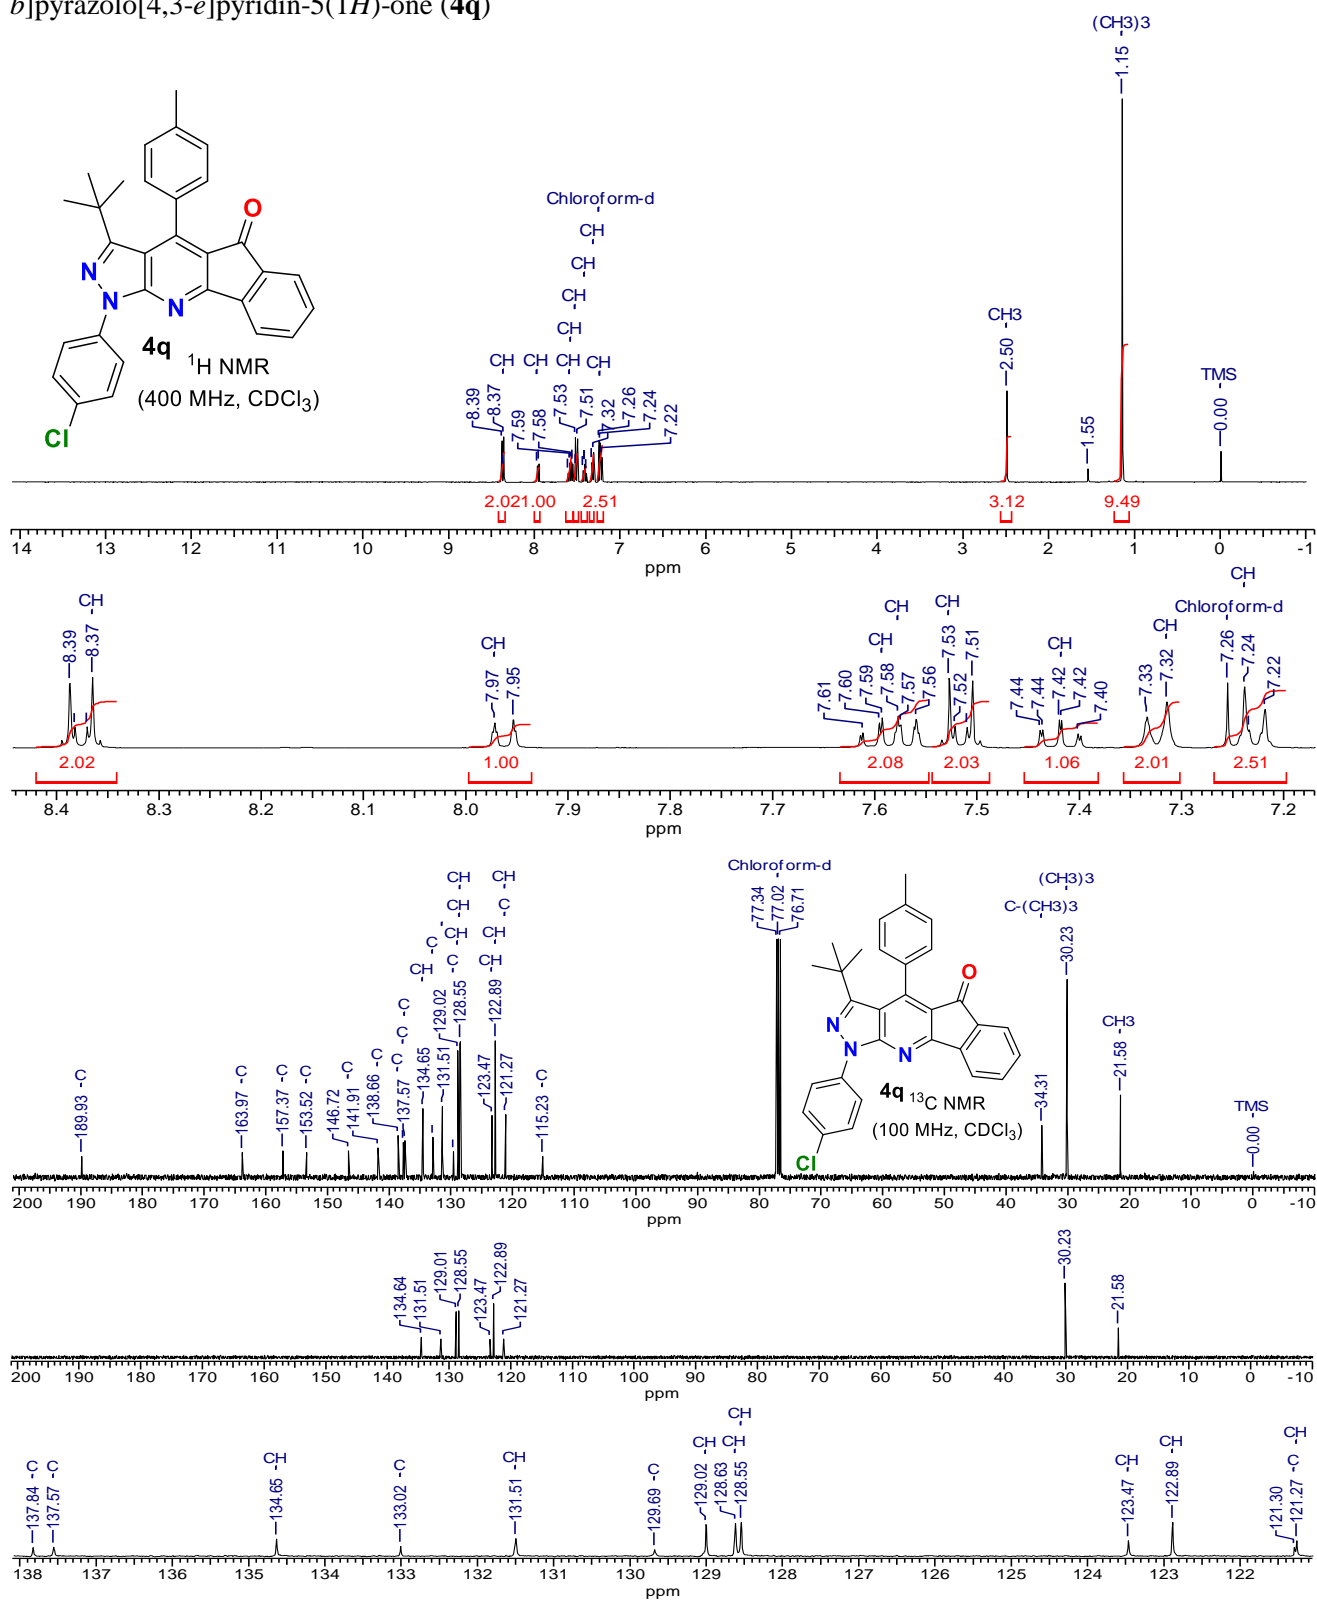

$^1\text{H}$  and  $^{13}\text{C}\{^1\text{H}\}$  NMR spectra of 3-(*tert*-butyl)-1,4-bis(4-chlorophenyl)indeno[1,2-*b*]pyrazolo[4,3-*e*]pyridin-5(1*H*)-one (**4r**)

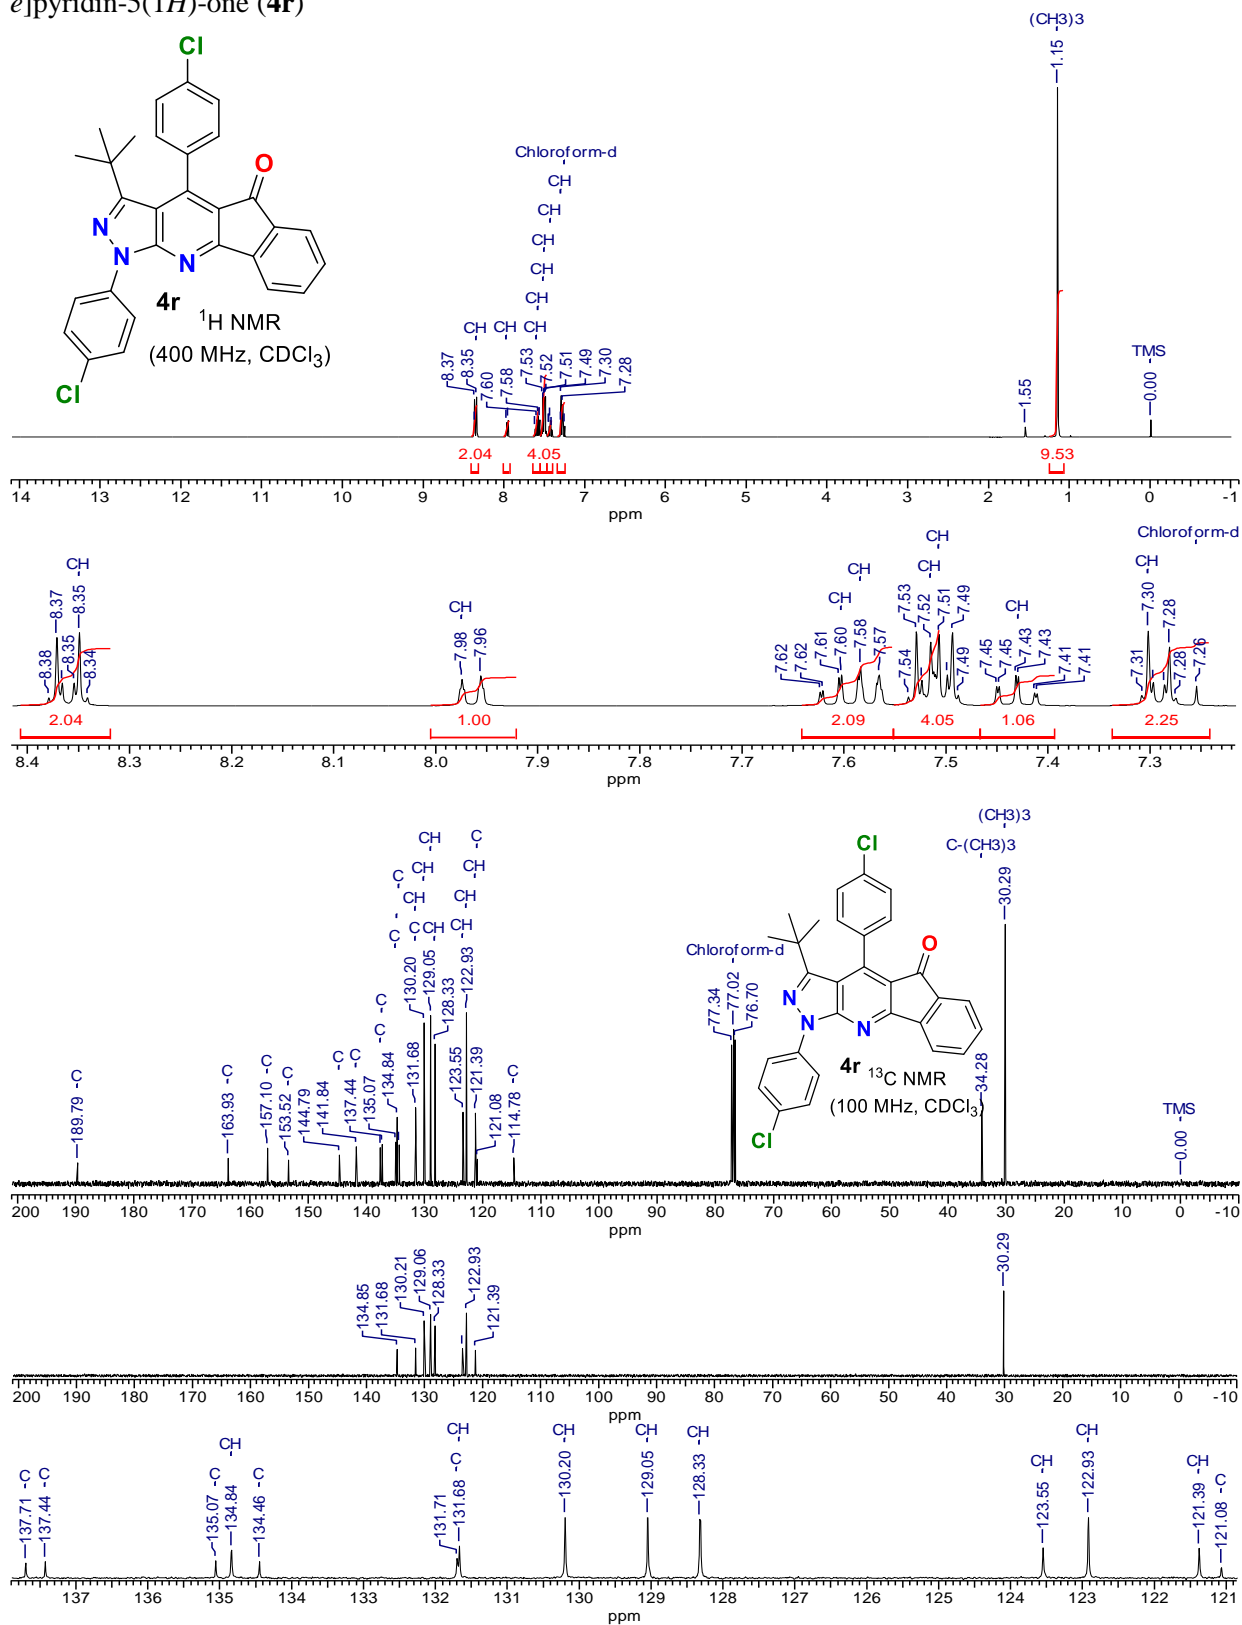

$^1\text{H}$  and  $^{13}\text{C}\{^1\text{H}\}$  NMR spectra of 4-(4-bromophenyl)-3-(*tert*-butyl)-1-(4-chlorophenyl)indeno[1,2-*b*]pyrazolo[4,3-*e*]pyridin-5(*1H*)-one (**4s**)

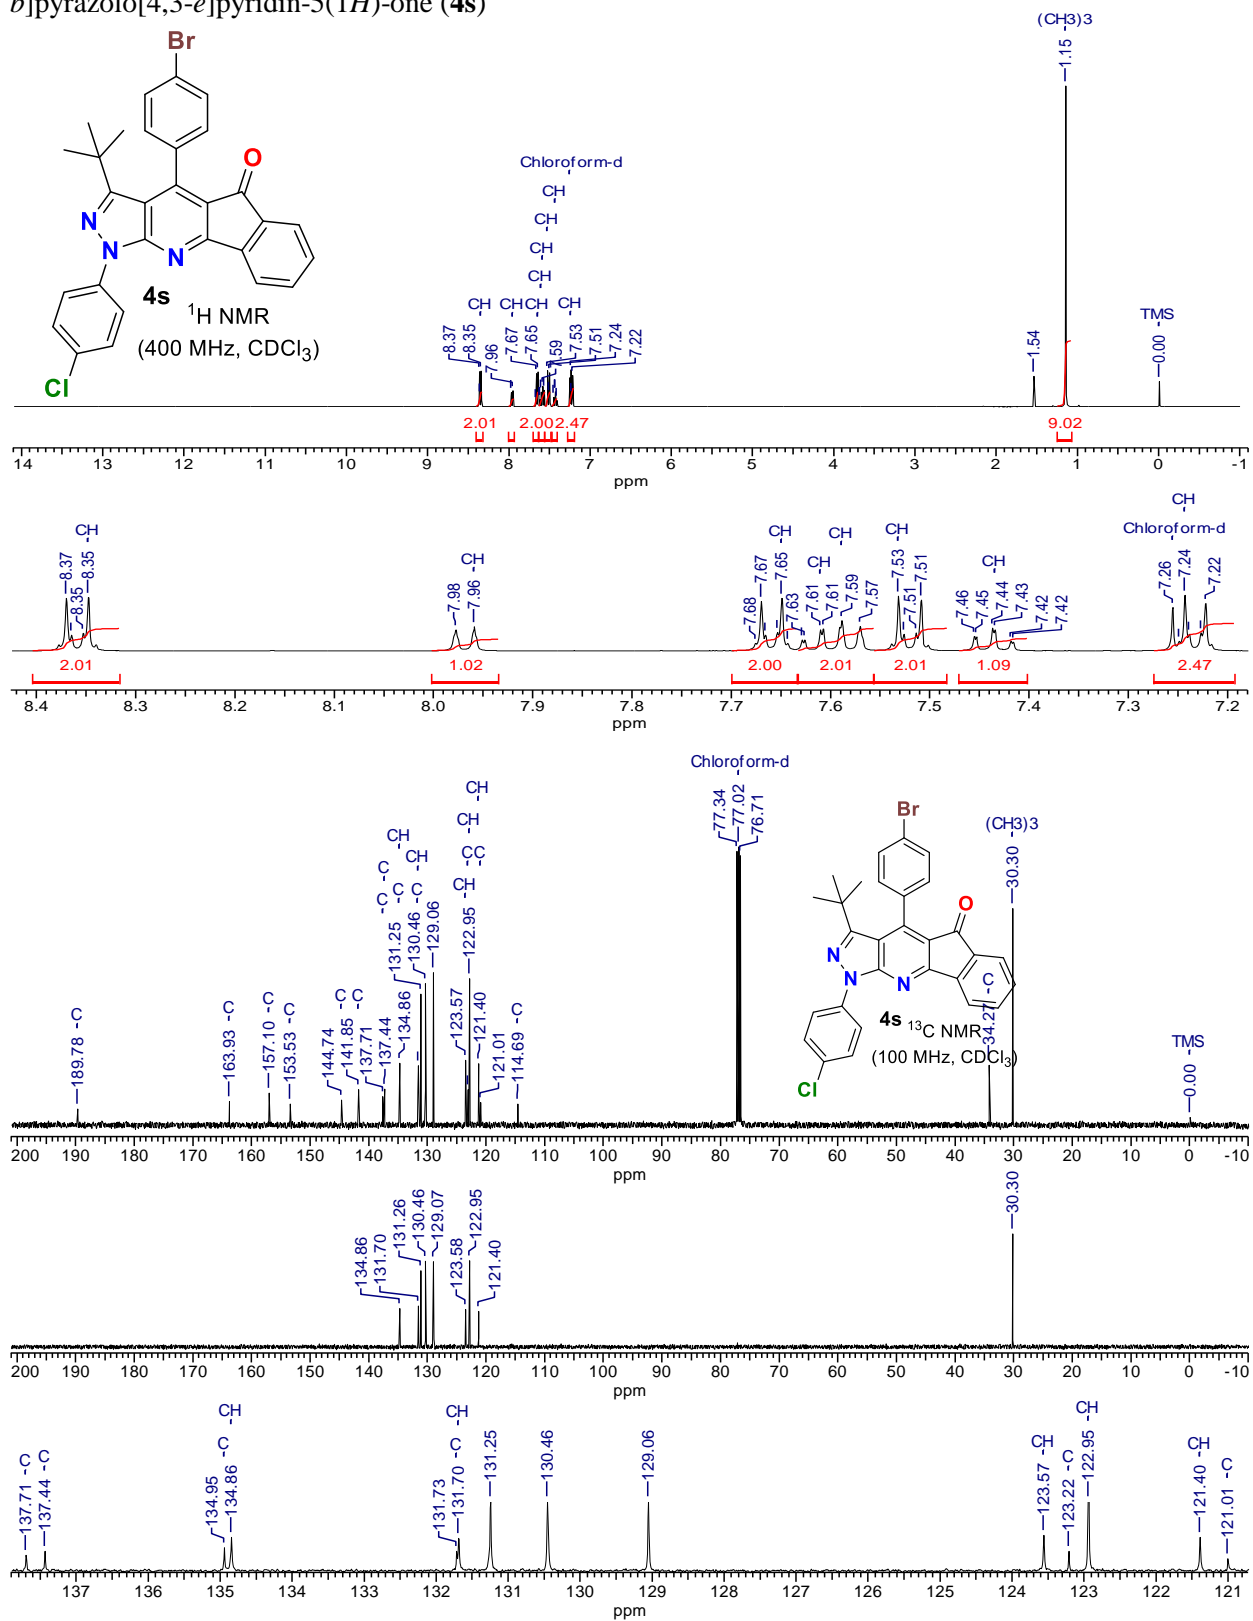

$^1\text{H}$  and  $^{13}\text{C}\{^1\text{H}\}$  NMR spectra of 3-(*tert*-butyl)-1-(4-chlorophenyl)-4-(4-(trifluoromethyl)phenyl)-indeno[1,2-*b*]pyrazolo[4,3-*e*]pyridin-5(1*H*)-one (**4t**)

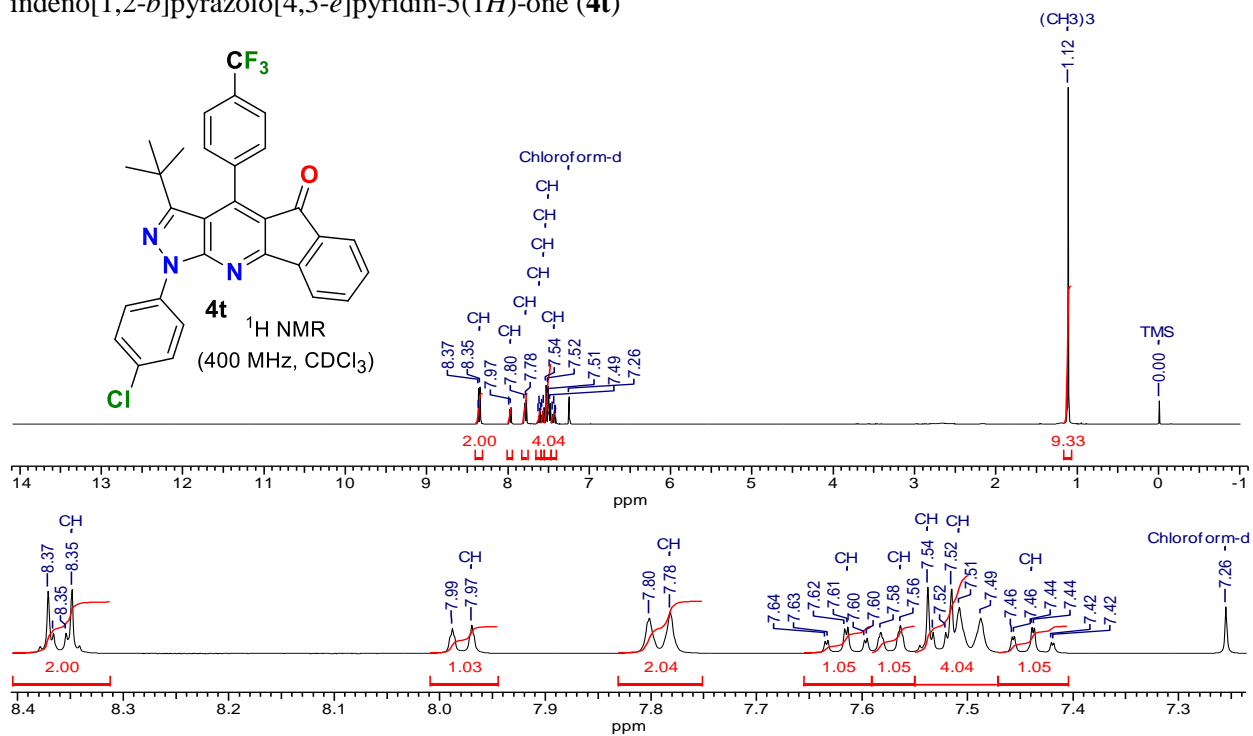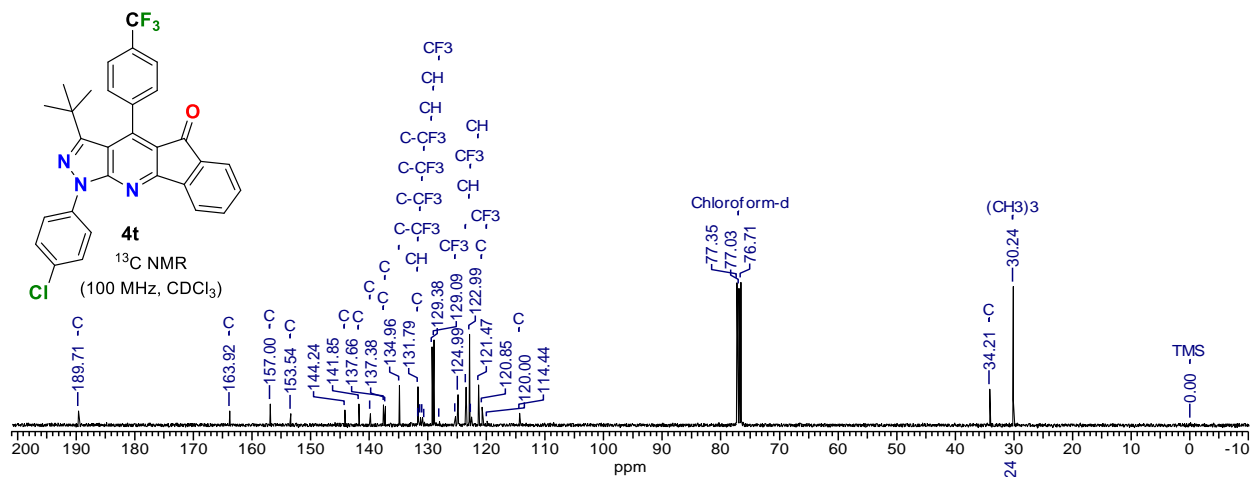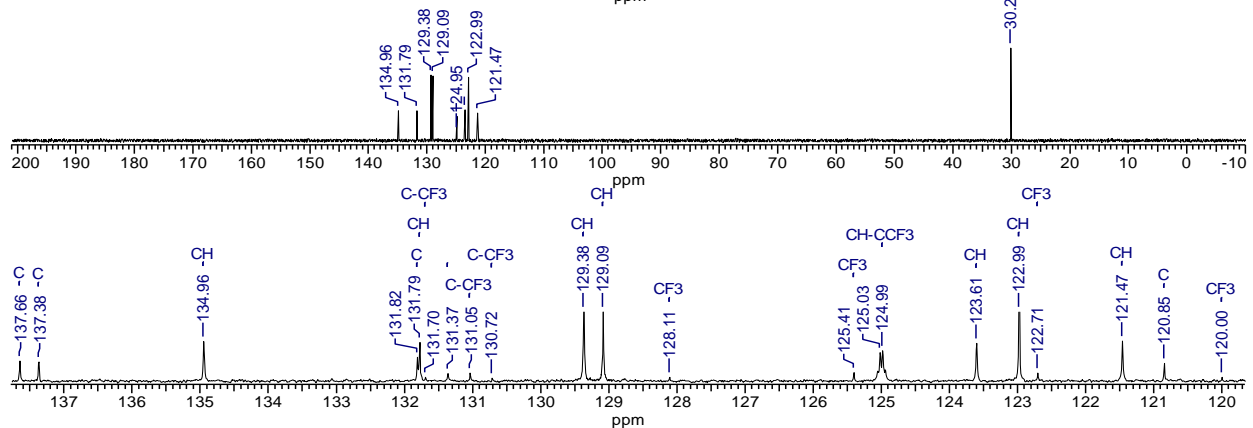

$^1\text{H}$  and  $^{13}\text{C}\{^1\text{H}\}$  NMR spectra of 3-(*tert*-butyl)-1-(4-chlorophenyl)-4-(4-methoxyphenyl)indeno[1,2-*b*]pyrazolo[4,3-*e*]pyridin-5(*1H*)-one (**4u**)

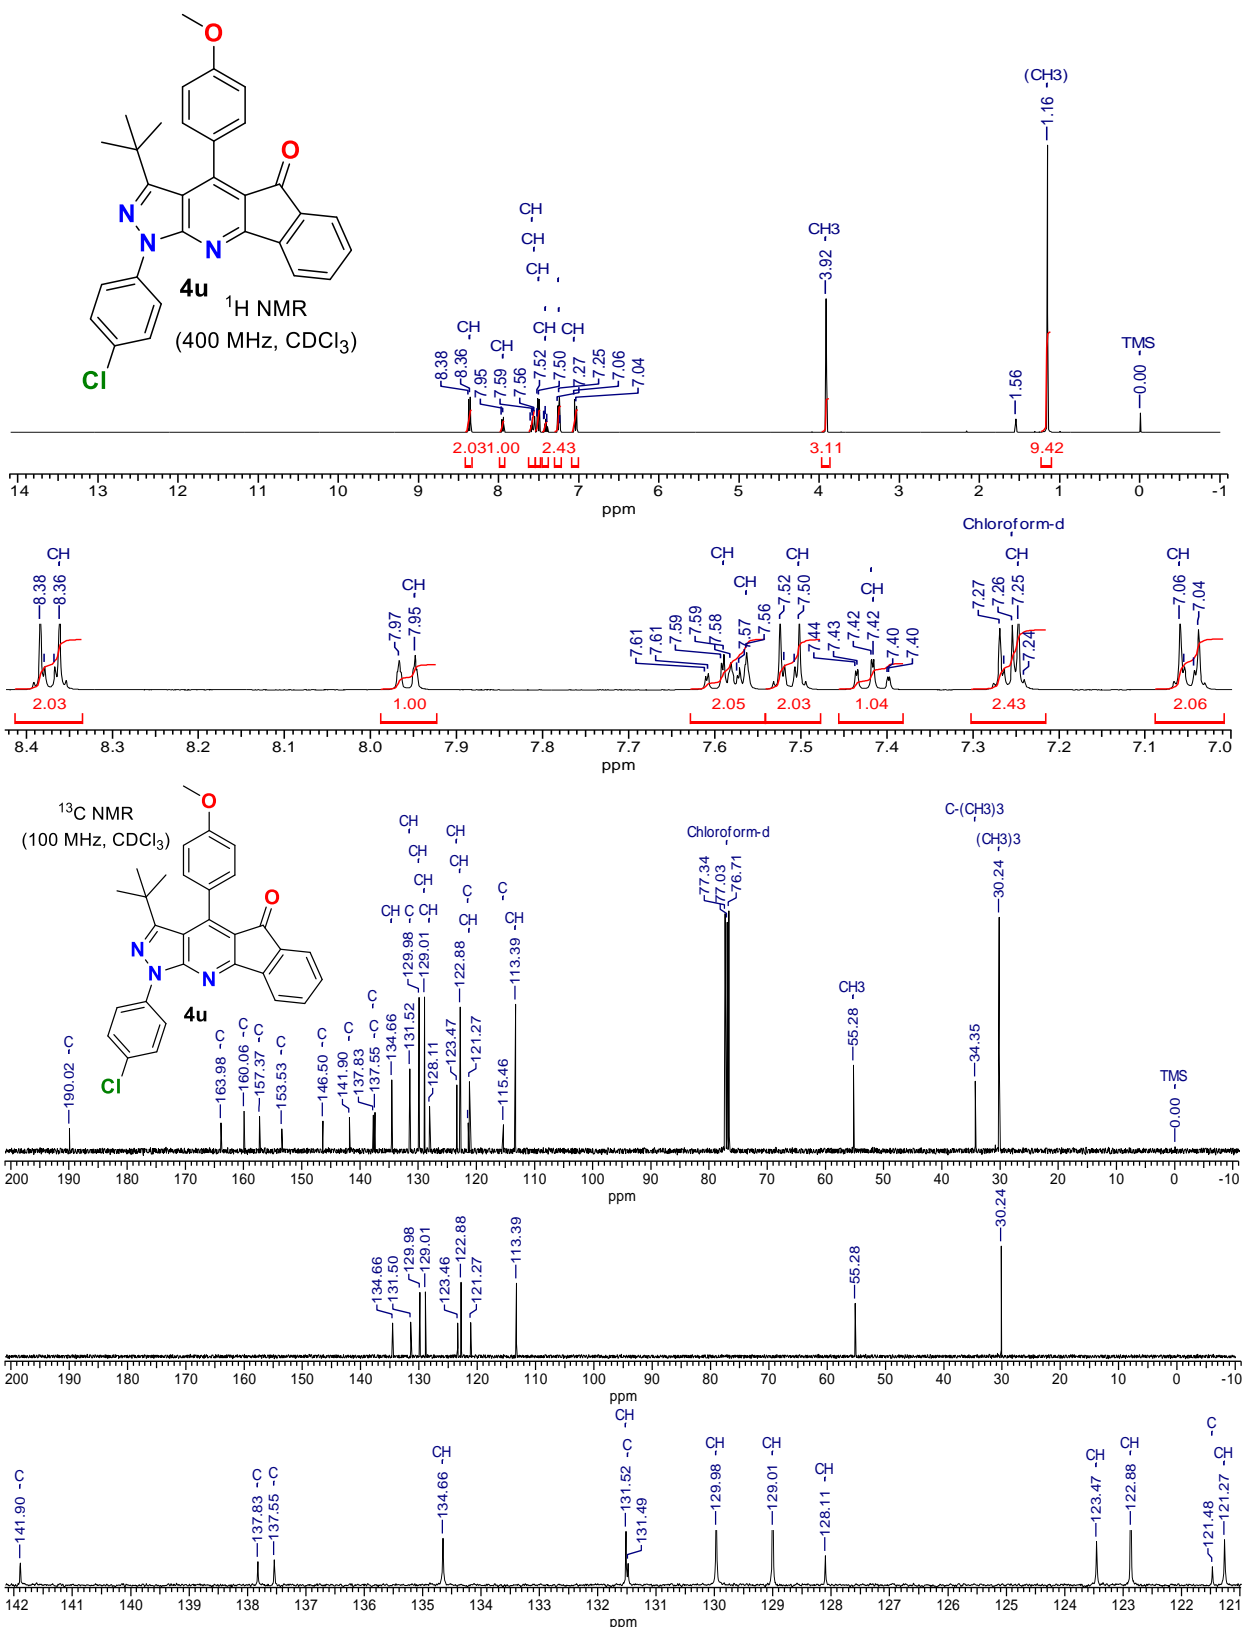

$^1\text{H}$  and  $^{13}\text{C}\{^1\text{H}\}$  NMR spectra of 3-(*tert*-butyl)-1-(4-chlorophenyl)-4-(4-nitrophenyl)indeno[1,2-*b*]pyrazolo[4,3-*e*]pyridin-5(*1H*)-one (**4v**)

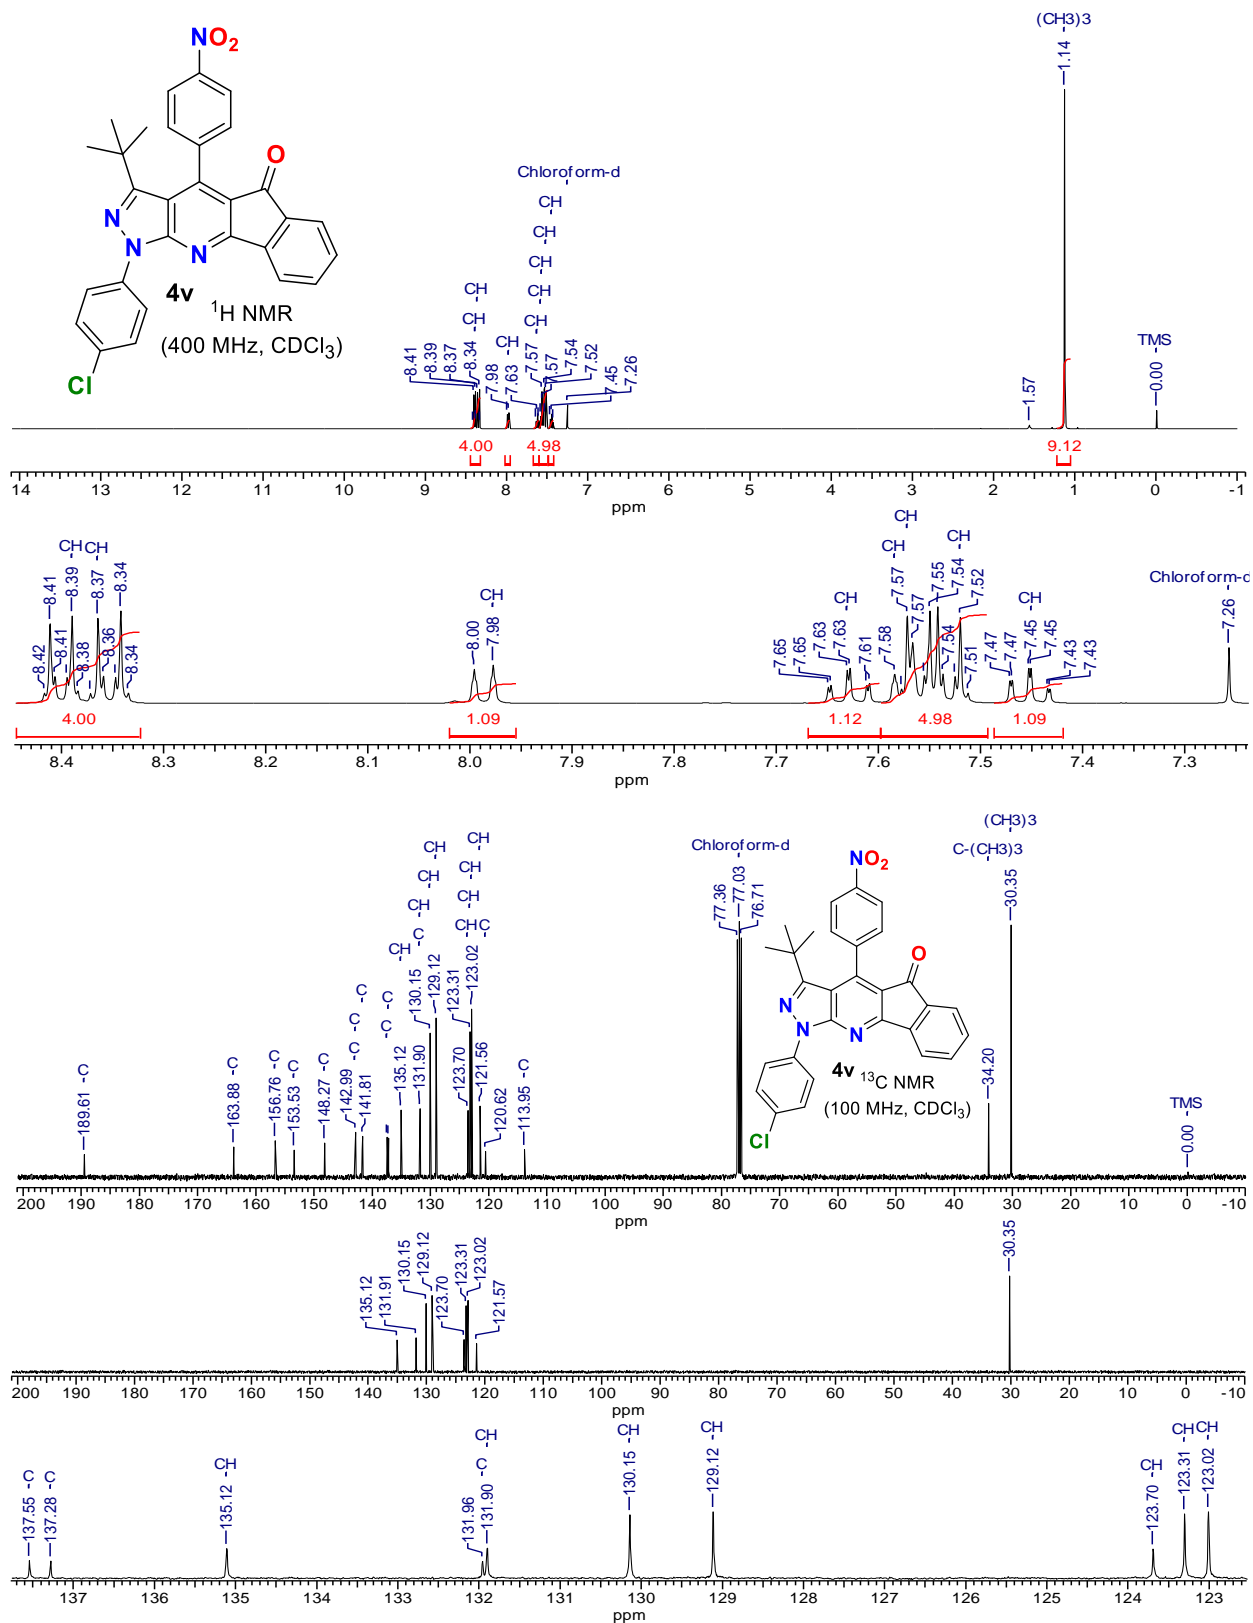

$^1\text{H}$  and  $^{13}\text{C}\{^1\text{H}\}$  NMR spectra of 1-(4-chlorophenyl)-3-methyl-4-phenylindeno[1,2-*b*]pyrazolo[4,3-*e*]pyridin-5(1*H*)-one (**4w**)

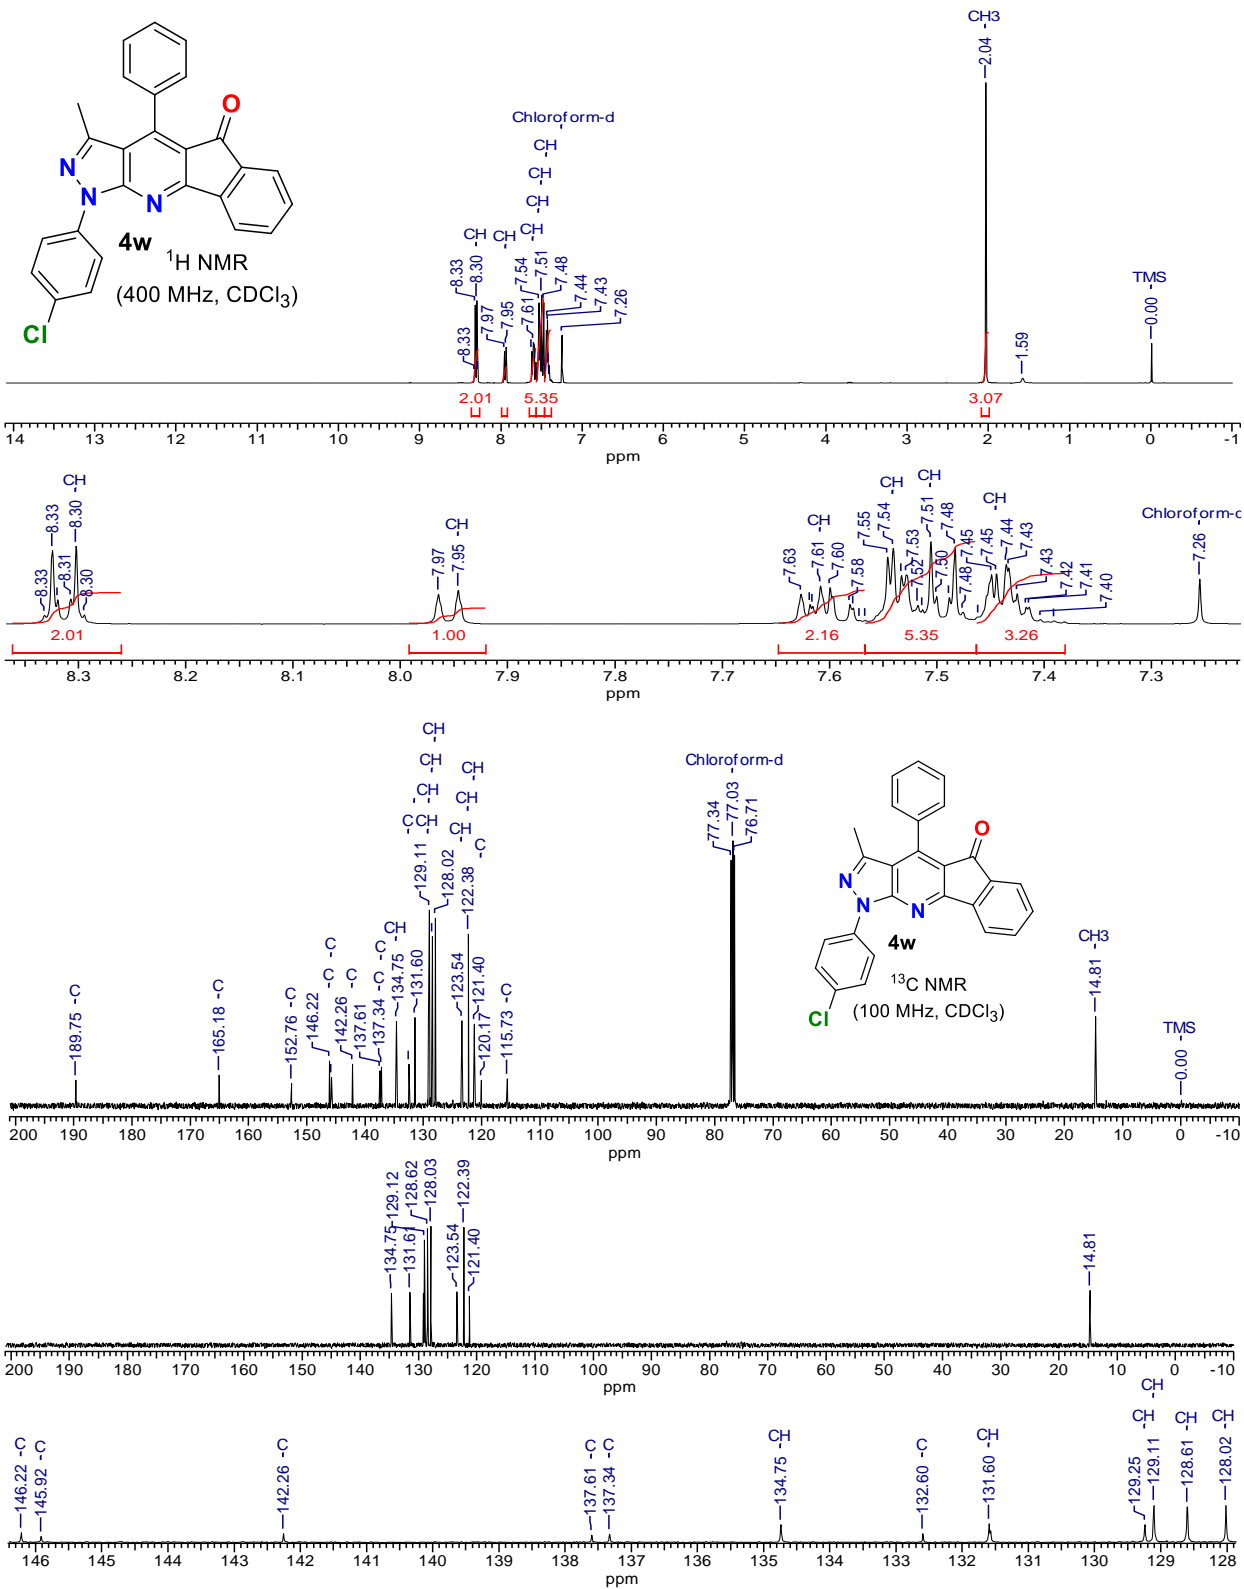

$^1\text{H}$  and  $^{13}\text{C}\{^1\text{H}\}$  NMR spectra of 3-(*tert*-Butyl)-1-(4-nitrophenyl)-4-phenylindeno[1,2-*b*]pyrazolo[4,3-*e*]pyridin-5(1*H*)-one (**4x**)

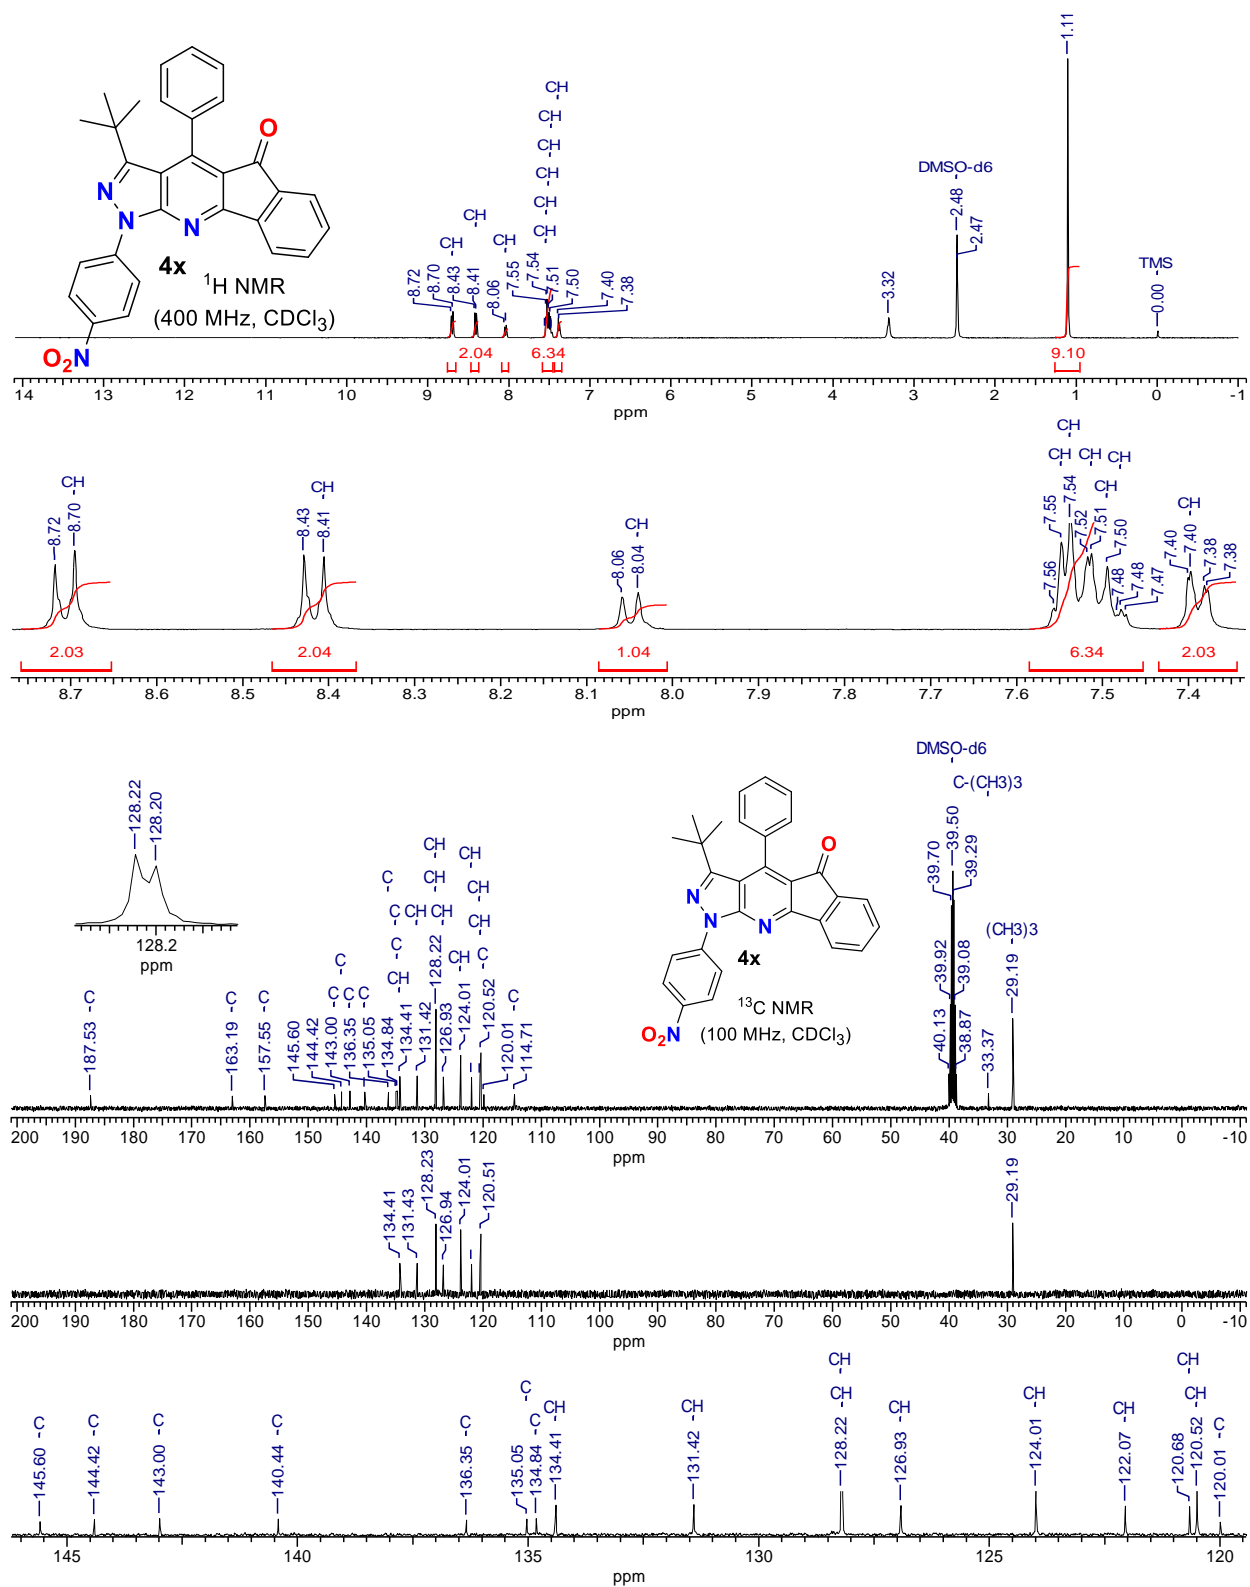



$^1\text{H}$  and  $^{13}\text{C}\{^1\text{H}\}$  NMR spectra of 2-(4-(Dimethylamino)benzylidene)-1*H*-indene-1,3(2*H*)-dione (**6h**)

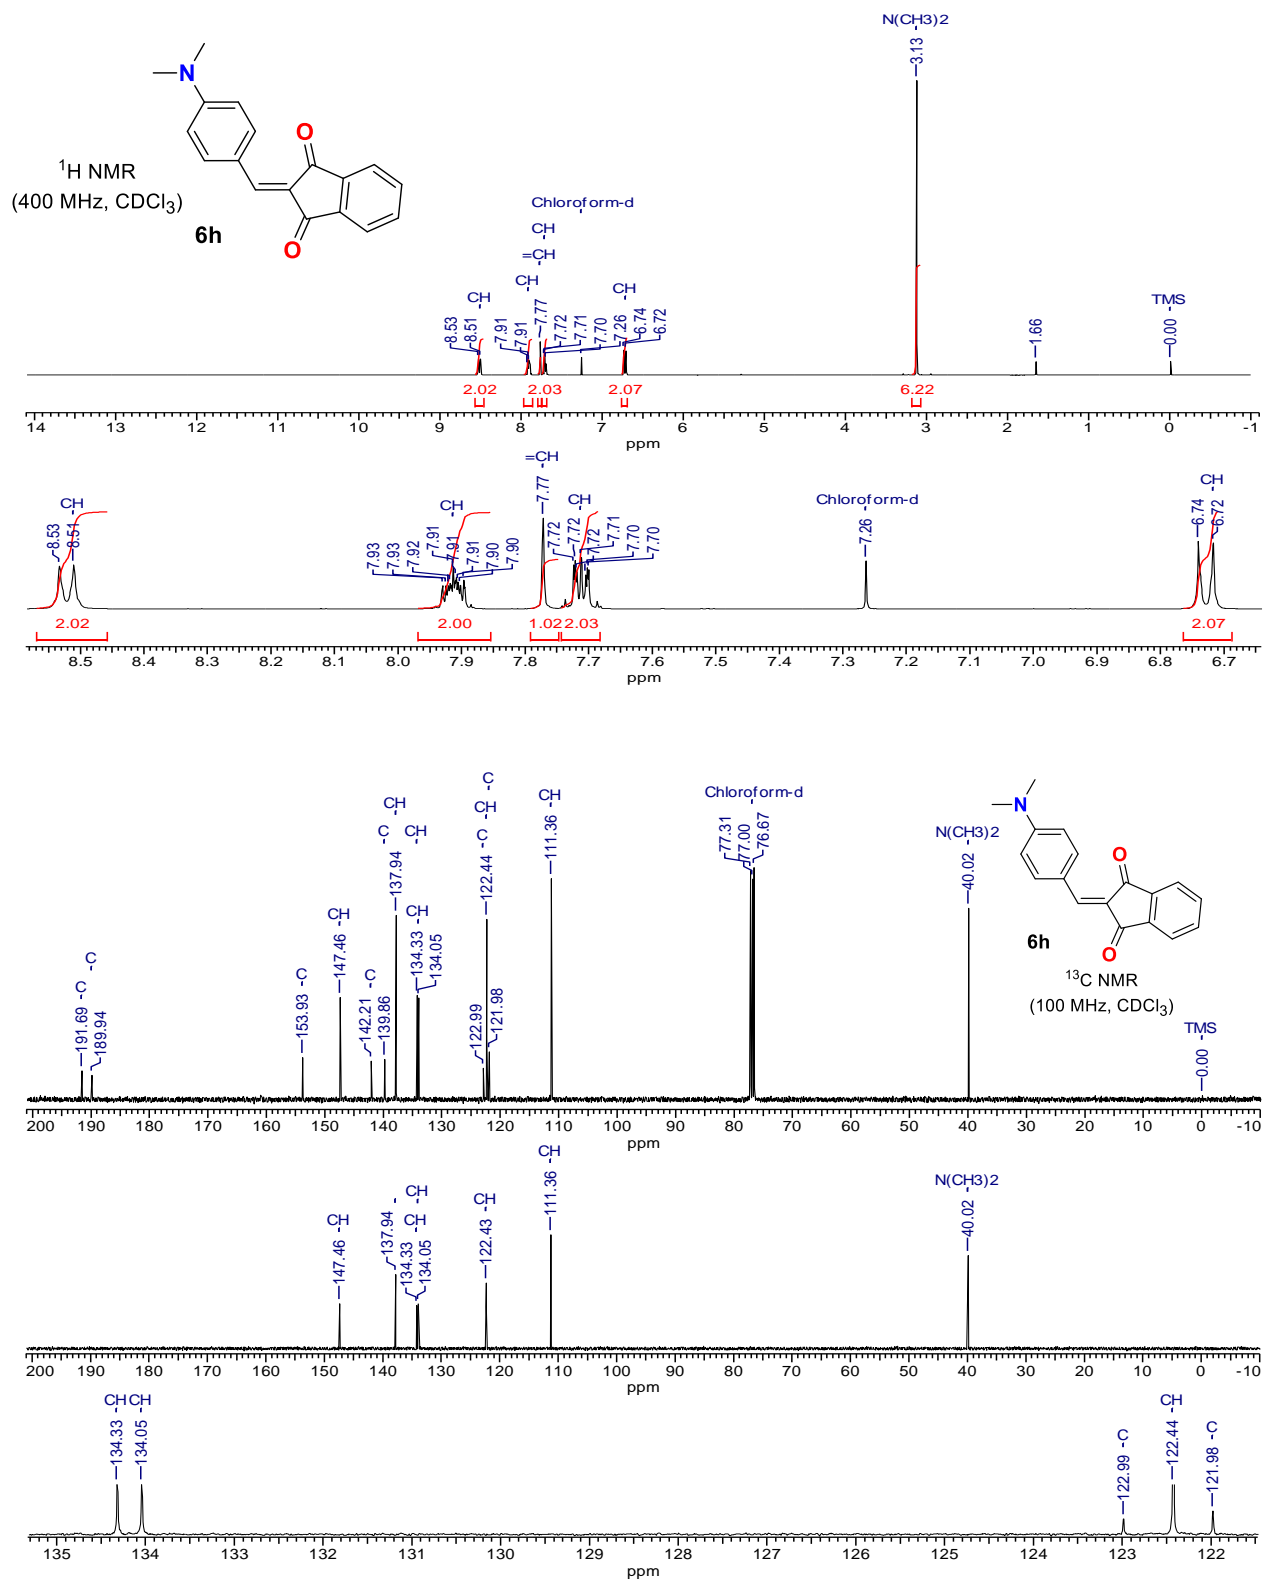

$^1\text{H}$  and  $^{13}\text{C}\{^1\text{H}\}$  NMR spectra of 2-(3-Methyl-1,4-diphenylindeno[1,2-*b*]pyrazolo[4,3-*e*]pyridin-5(1*H*)-ylidene)malononitrile (**7a**)

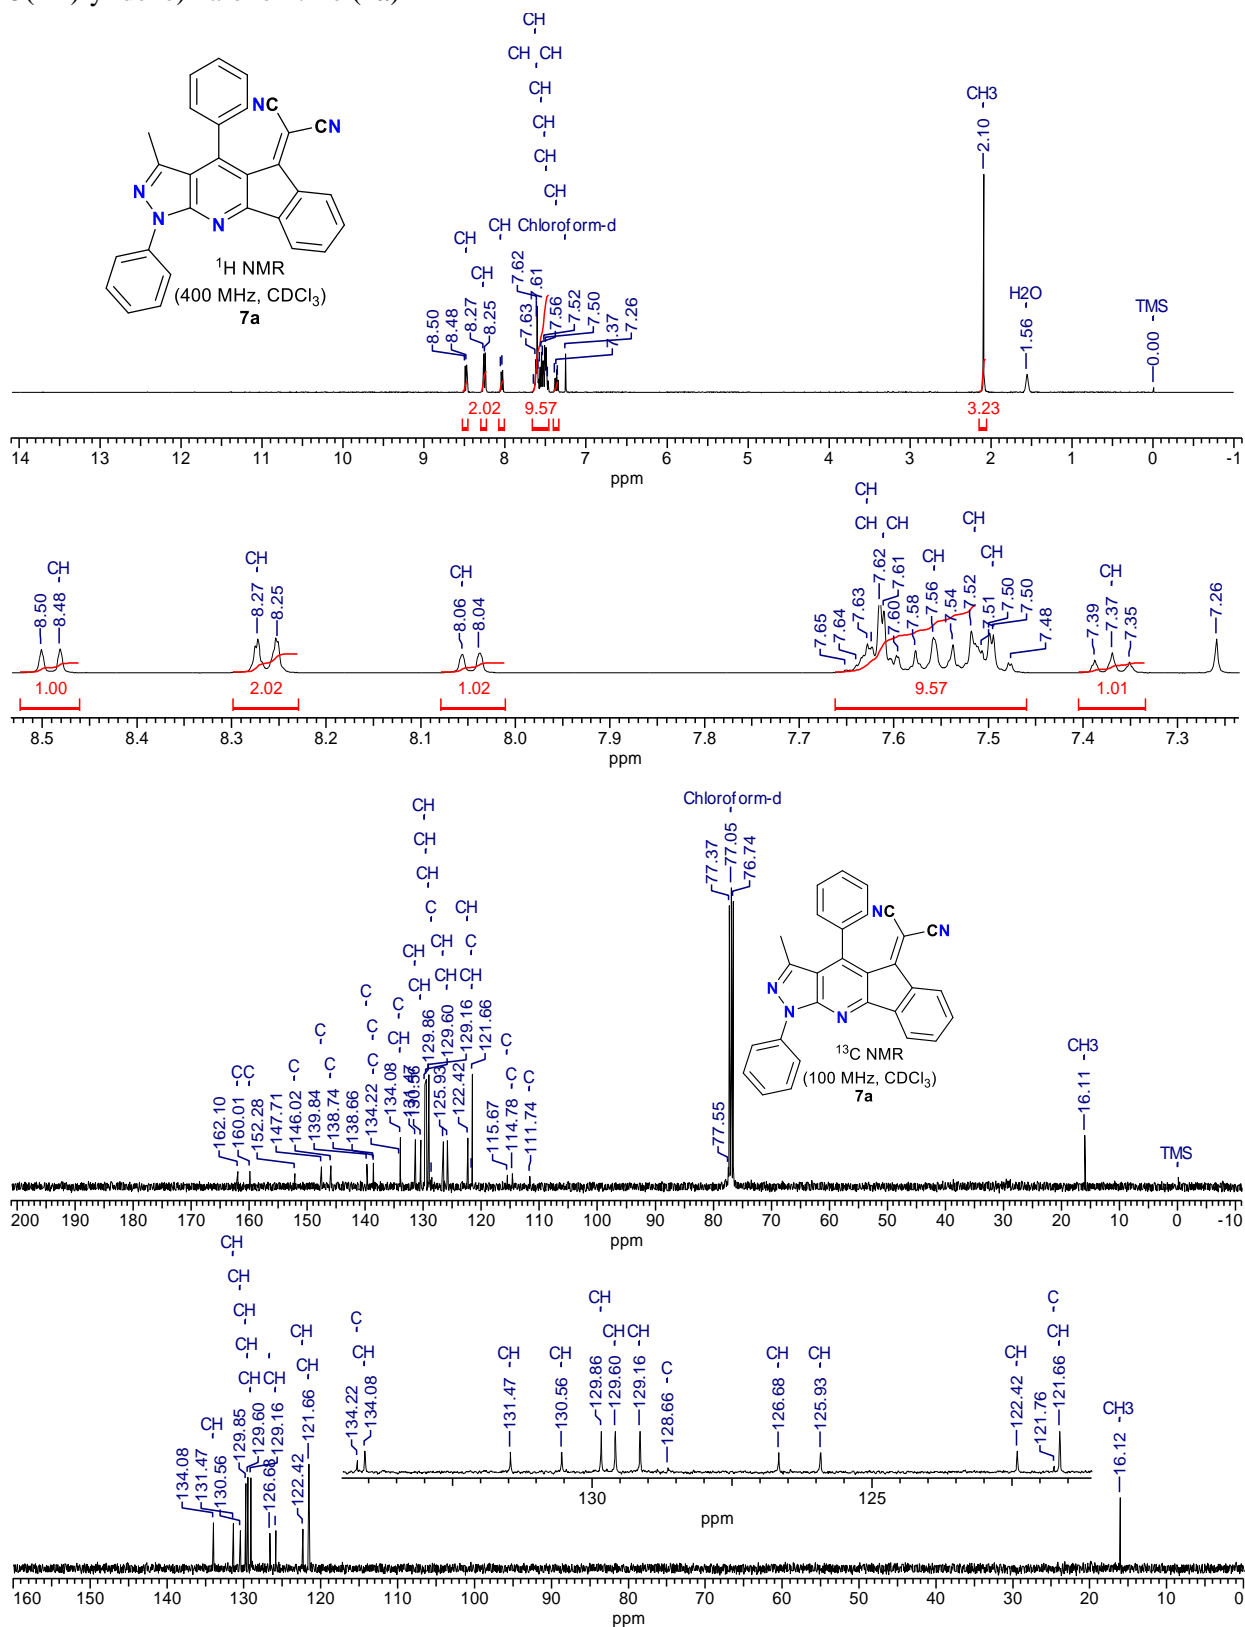

$^1\text{H}$  and  $^{13}\text{C}\{^1\text{H}\}$  NMR spectra of 2-(4-(4-methoxyphenyl)-3-methyl-1-phenylindeno[1,2-*b*]pyrazolo[4,3-*e*]pyridin-5(*1H*)-ylidene)malononitrile (**7b**)

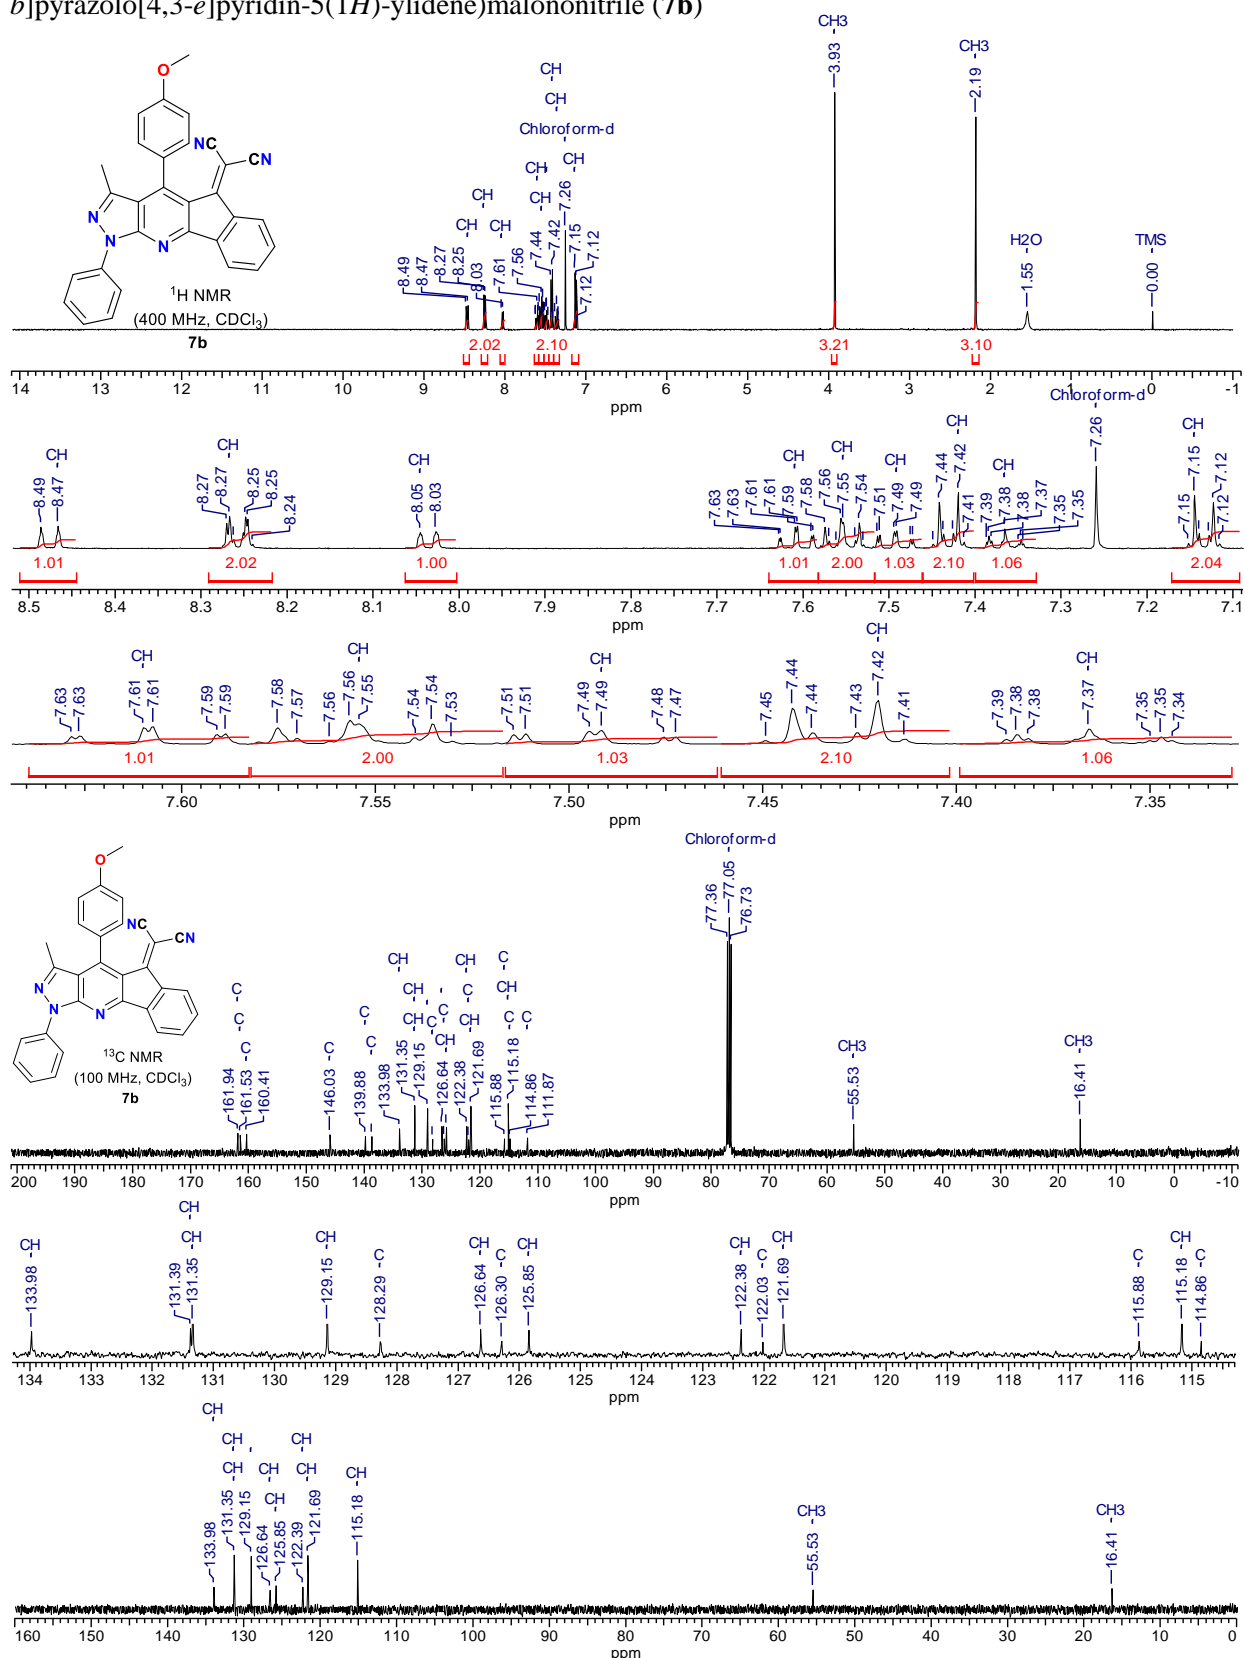

$^1\text{H}$  and  $^{13}\text{C}\{^1\text{H}\}$  NMR spectra of 2-(3-Methyl-1-phenyl-4-(4-(trifluoromethyl)phenyl)indeno[1,2-*b*]pyrazolo[4,3-*e*]pyridin-5(*1H*)-ylidene)malononitrile (**7c**)

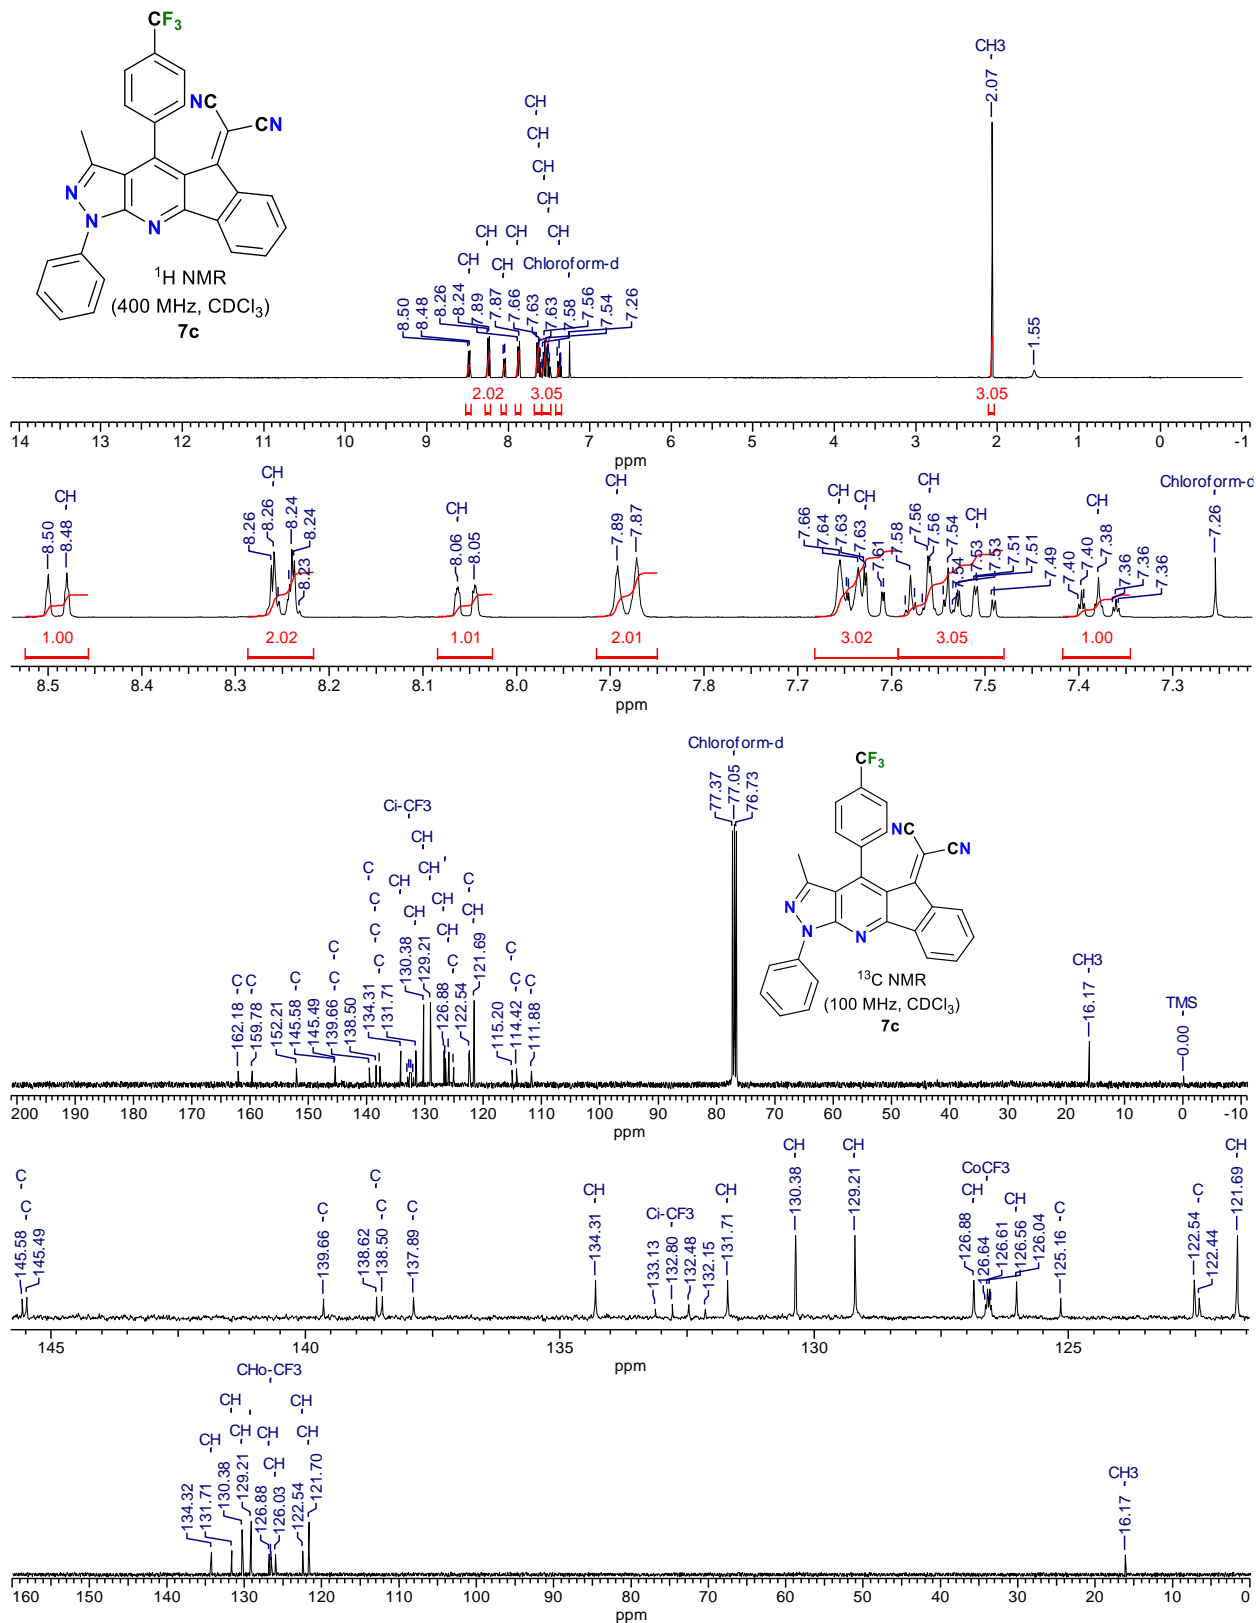

$^1\text{H}$  and  $^{13}\text{C}\{^1\text{H}\}$  NMR spectra of 2-(4-(4-(Dimethylamino)phenyl)-3-methyl-1-phenylindeno[1,2-*b*]pyrazolo[4,3-*e*]pyridin-5(*1H*)-ylidene)malononitrile (**7d**)

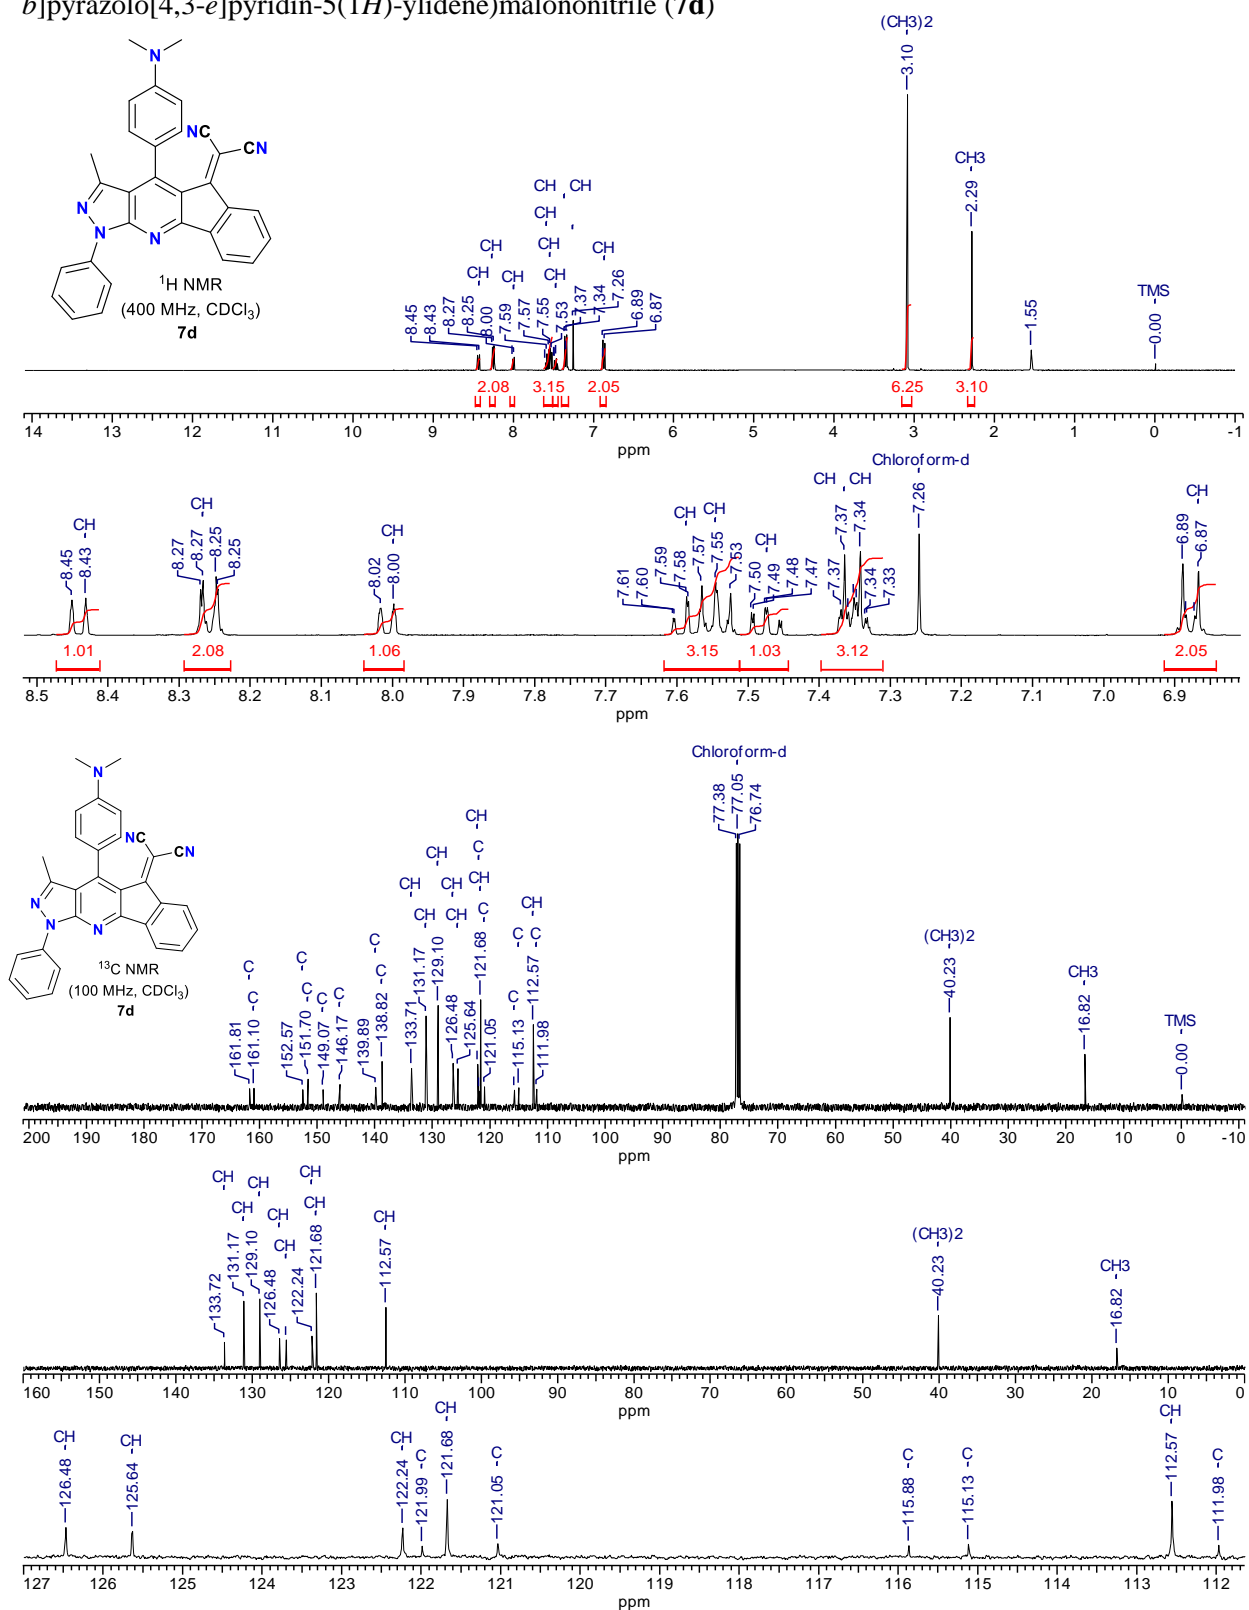

## 8. ORTEP Drawing for Structure 7b

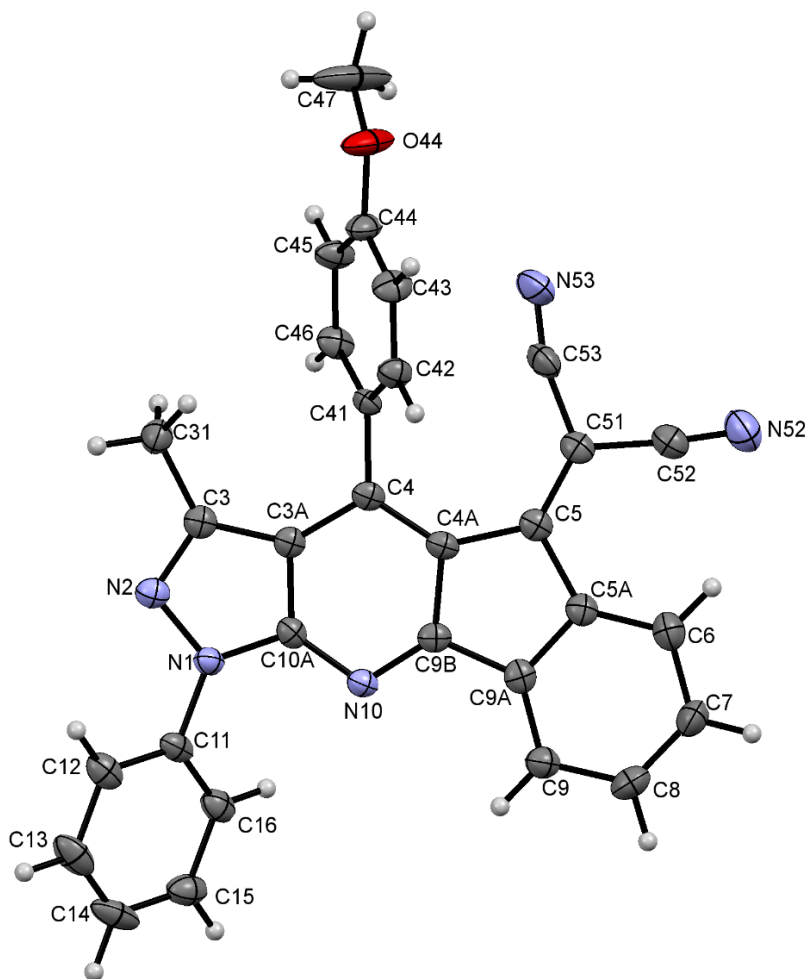

**Fig. S12.** ORTEP drawing for structure **7b**. Displacement ellipsoids are drawn at the 70% probability level and hydrogen atoms are shown as small spheres of arbitrary radius.

## 9. HRMS analysis data of the final products 7a-d

### Qualitative Compound Report

|                               |                                   |                      |               |
|-------------------------------|-----------------------------------|----------------------|---------------|
| <b>Data File</b>              | JOH-CR-MEZCLA.d                   | <b>Sample Name</b>   | Unavailable   |
| <b>Sample Type</b>            | Unavailable                       | <b>Position</b>      | Unavailable   |
| <b>Instrument Name</b>        | Unavailable                       | <b>User Name</b>     | Unavailable   |
| <b>Acq Method</b>             |                                   | <b>Acquired Time</b> | Unavailable   |
| <b>IRM Calibration Status</b> | Success                           | <b>DA Method</b>     | generalESI+.m |
| <b>Comment</b>                | Sample information is unavailable |                      |               |

#### Compound Table

| Compound Label    | RT    | Mass     | Abund | Formula    | Tgt Mass | Diff (ppm) | MFG Formula | DB Formula |
|-------------------|-------|----------|-------|------------|----------|------------|-------------|------------|
| Cpd 1: C29 H17 N5 | 7.535 | 435.1477 | 5796  | C29 H17 N5 | 435.1484 | -1.6       | C29 H17 N5  | C29 H17 N5 |

| Compound Label    | m/z      | RT    | Algorithm       | Mass     |
|-------------------|----------|-------|-----------------|----------|
| Cpd 1: C29 H17 N5 | 436.1548 | 7.535 | Find By Formula | 435.1477 |

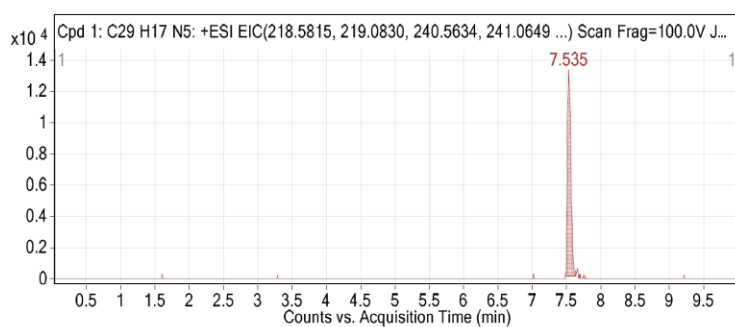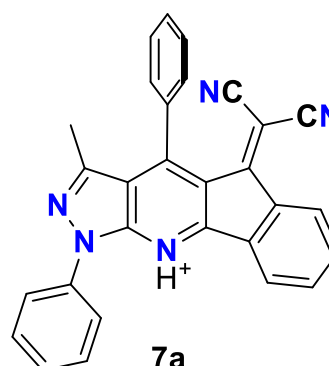

$[M+H]^+$  C<sub>29</sub>H<sub>18</sub>N<sub>5</sub><sup>+</sup>  
Calc. for 436.1557

#### MS Spectrum

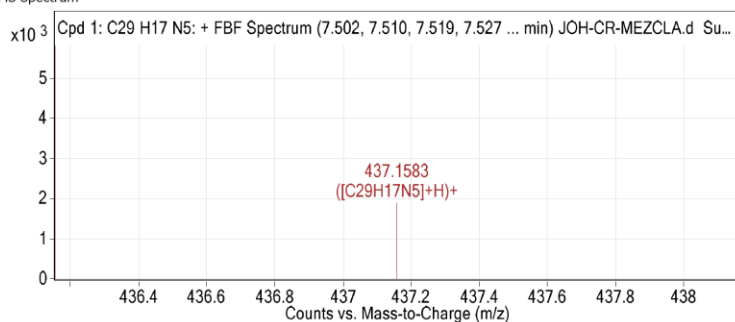

#### MS Zoomed Spectrum

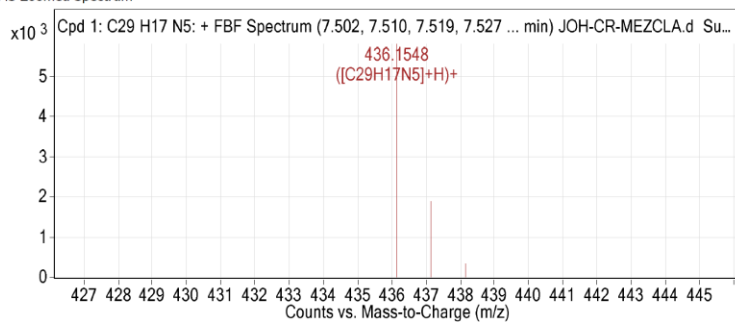

#### MS Spectrum Peak List

| m/z      | z | Abund   | Formula  | Ion    |
|----------|---|---------|----------|--------|
| 436.1548 | 1 | 5795.55 | C29H17N5 | (M+H)+ |
| 437.1583 | 1 | 1895.17 | C29H17N5 | (M+H)+ |

## Qualitative Compound Report

|                        |                                   |               |               |
|------------------------|-----------------------------------|---------------|---------------|
| Data File              | JOH-CR-MEZCLA.d                   | Sample Name   | Unavailable   |
| Sample Type            | Unavailable                       | Position      | Unavailable   |
| Instrument Name        | Unavailable                       | User Name     | Unavailable   |
| Acq Method             |                                   | Acquired Time | Unavailable   |
| IRM Calibration Status | Success                           | DA Method     | generalESI+.m |
| Comment                | Sample information is unavailable |               |               |

### Compound Table

| Compound Label      | RT    | Mass     | Abund | Formula      | Tgt Mass | Diff (ppm) | MFG Formula  | DB Formula   |
|---------------------|-------|----------|-------|--------------|----------|------------|--------------|--------------|
| Cpd 2: C30 H19 N5 O | 7.494 | 465.1579 | 2019  | C30 H19 N5 O | 465.159  | -2.34      | C30 H19 N5 O | C30 H19 N5 O |

| Compound Label      | m/z      | RT    | Algorithm       | Mass     |
|---------------------|----------|-------|-----------------|----------|
| Cpd 2: C30 H19 N5 O | 466.1647 | 7.494 | Find By Formula | 465.1579 |

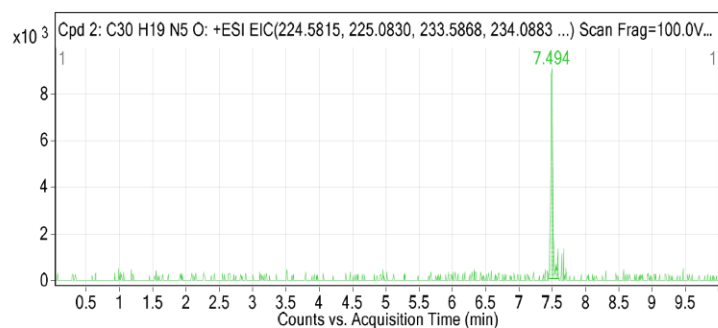

### MS Spectrum

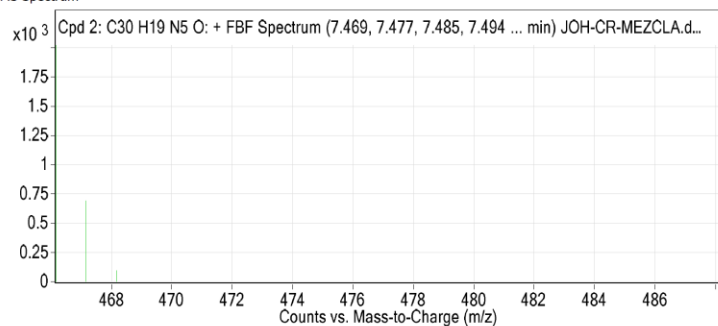

### MS Zoomed Spectrum

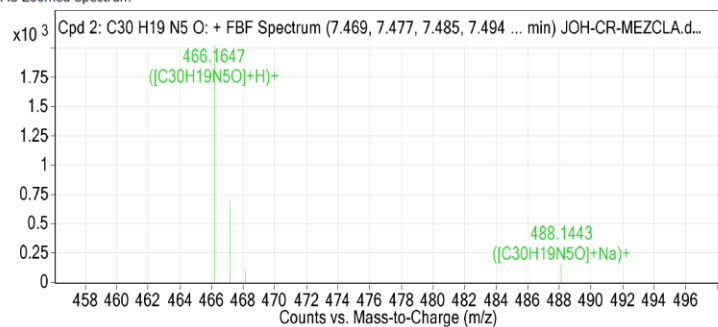

### MS Spectrum Peak List

| m/z      | z | Abund  | Formula   | Ion    |
|----------|---|--------|-----------|--------|
| 466.1647 | 1 | 2018.9 | C30H19N5O | (M+H)+ |
| 467.1694 | 1 | 686.01 | C30H19N5O | (M+H)+ |

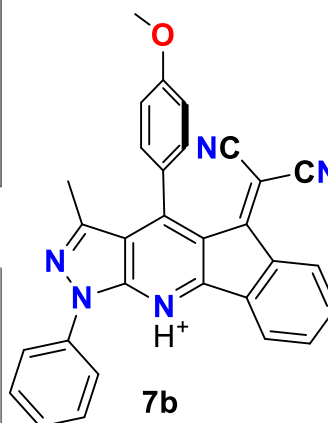

[M+H<sup>+</sup>] C<sub>30</sub>H<sub>20</sub>N<sub>5</sub>O<sup>+</sup>  
Calc. for 466.1662



## Qualitative Compound Report

|                               |                                   |                      |               |
|-------------------------------|-----------------------------------|----------------------|---------------|
| <b>Data File</b>              | JOH-CR-MEZCLA.d                   | <b>Sample Name</b>   | Unavailable   |
| <b>Sample Type</b>            | Unavailable                       | <b>Position</b>      | Unavailable   |
| <b>Instrument Name</b>        | Unavailable                       | <b>User Name</b>     | Unavailable   |
| <b>Acq Method</b>             |                                   | <b>Acquired Time</b> | Unavailable   |
| <b>IRM Calibration Status</b> | Success                           | <b>DA Method</b>     | generalESI+.m |
| <b>Comment</b>                | Sample information is unavailable |                      |               |

### Compound Table

| Compound Label       | RT    | Mass     | Abund | Formula       | Tgt Mass | Diff (ppm) | MFG Formula   | DB Formula    |
|----------------------|-------|----------|-------|---------------|----------|------------|---------------|---------------|
| Cpd 5: C30 H16 F3 N5 | 7.627 | 503.1348 | 3360  | C30 H16 F3 N5 | 503.1358 | -1.95      | C30 H16 F3 N5 | C30 H16 F3 N5 |

| Compound Label       | m/z      | RT    | Algorithm       | Mass     |
|----------------------|----------|-------|-----------------|----------|
| Cpd 5: C30 H16 F3 N5 | 504.1419 | 7.627 | Find By Formula | 503.1348 |

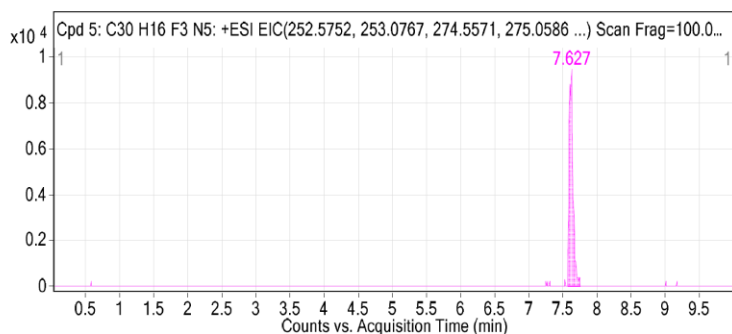

### MS Spectrum

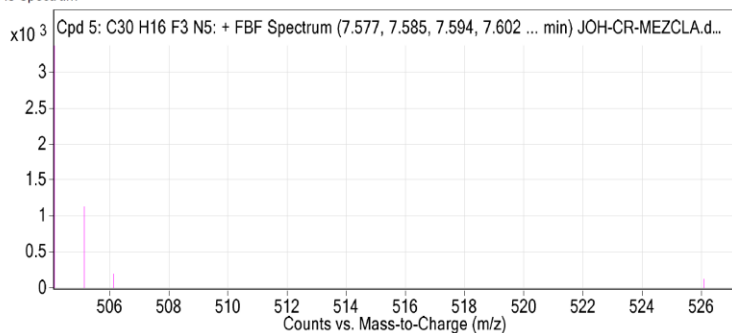

### MS Zoomed Spectrum

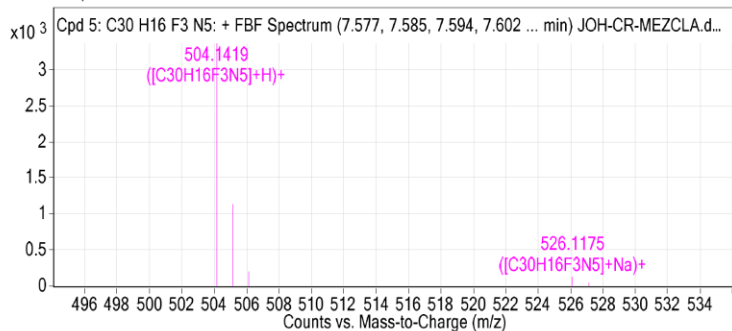

### MS Spectrum Peak List

| m/z      | z | Abund   | Formula    | Ion    |
|----------|---|---------|------------|--------|
| 504.1419 | 1 | 3360.43 | C30H16F3N5 | (M+H)+ |
| 505.1464 | 1 | 1131.82 | C30H16F3N5 | (M+H)+ |

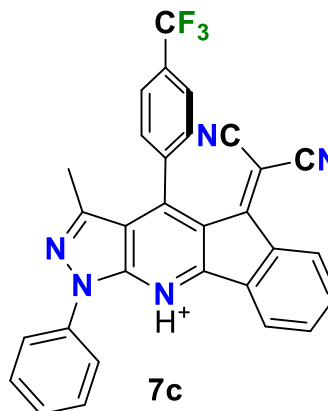

[M+H<sup>+</sup>] C<sub>30</sub>H<sub>27</sub>F<sub>3</sub>N<sub>5</sub><sup>+</sup>  
Calc. for 504.1431



# Qualitative Compound Report

|                               |                                   |                      |               |
|-------------------------------|-----------------------------------|----------------------|---------------|
| <b>Data File</b>              | JOH-CR-MEZCLA.d                   | <b>Sample Name</b>   | Unavailable   |
| <b>Sample Type</b>            | Unavailable                       | <b>Position</b>      | Unavailable   |
| <b>Instrument Name</b>        | Unavailable                       | <b>User Name</b>     | Unavailable   |
| <b>Acq Method</b>             |                                   | <b>Acquired Time</b> | Unavailable   |
| <b>IRM Calibration Status</b> | Success                           | <b>DA Method</b>     | generalESI+.m |
| <b>Comment</b>                | Sample information is unavailable |                      |               |

### Compound Table

| Compound Label    | RT    | Mass     | Abund | Formula    | Tgt Mass | Diff (ppm) | MFG Formula | DB Formula |
|-------------------|-------|----------|-------|------------|----------|------------|-------------|------------|
| Cpd 4: C31 H22 N6 | 7.761 | 478.1895 | 18643 | C31 H22 N6 | 478.1906 | -2.22      | C31 H22 N6  | C31 H22 N6 |

| Compound Label    | m/z      | RT    | Algorithm       | Mass     |
|-------------------|----------|-------|-----------------|----------|
| Cpd 4: C31 H22 N6 | 479.1969 | 7.761 | Find By Formula | 478.1895 |

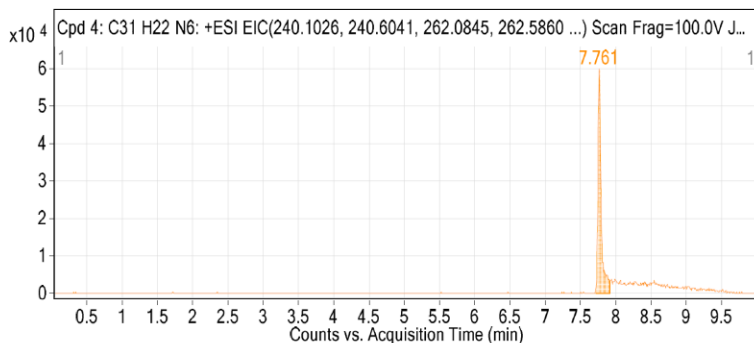

### MS Spectrum

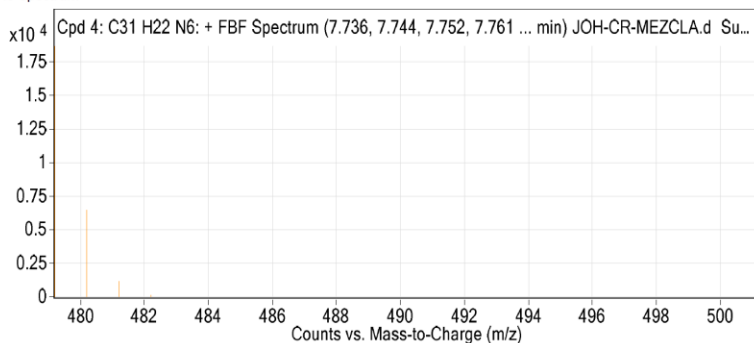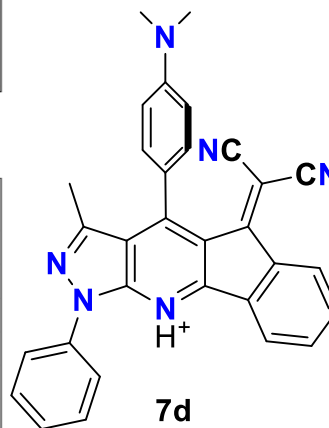

[M+H<sup>+</sup>] C<sub>31</sub>H<sub>23</sub>N<sub>6</sub><sup>+</sup>  
Calc. for 479.1979

### MS Zoomed Spectrum

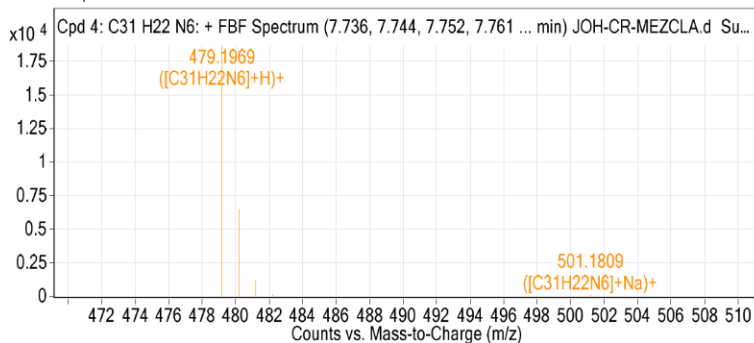

### MS Spectrum Peak List

| m/z      | z | Abund    | Formula  | Ion                |
|----------|---|----------|----------|--------------------|
| 479.1969 | 1 | 18642.89 | C31H22N6 | (M+H) <sup>+</sup> |
| 480.1996 | 1 | 6443.86  | C31H22N6 | (M+H) <sup>+</sup> |

## 10. References

- 1 L. Palatinus and G. Chapuis, *J. Appl. Cryst.*, 2007, **40**, 786-790
- 2 G. M. Sheldrick, *Acta Cryst.*, 2015, **C71**, 3-8.
- 3 C. F. Macrae, I. J. Bruno, J. A. Chisholm, P. R. Edgington, P. McCabe, E. Pidcock, L. Rodriguez-Monge, R. Taylor, J. van de Streek and P. A. Wood, *J. Appl. Cryst.*, 2008, **41**, 466-470.
- 4 J. Quiroga, D. Cobo, B. Insuasty, R. Abonía, S. Cruz, M. Noguerras and J. Cobo, *J. Heterocycl. Chem.*, 2008, **45**, 155–159.
- 5 J. Portilla, C. Lizarazo, J. Cobo and C. Glidewell, *Acta Cryst.*, 2011, **C67**, 479–483.
- 6 C. Würth, M. Grabolle, J. Pauli, M. Spieles and U. Resch-Genger, *Nat. Protoc.*, 2013, **8**, 1535–1550.
- 7 U. Resch-Genger and K. Rurack, *Pure Appl. Chem.*, 2013, **85**, 2005–2026.
- 8 G. A. Crosby and J. N. Demas, *J. Phys. Chem.*, 1971, **75**, 991–1024.
- 9 M. D. Hanwell, D. E. Curtis, D. C. Lonie, T. Vandermeersch, E. Zurek and G. R. Hutchison, *J. Cheminform.*, 2012, **4**, 1–17.
- 10 M. J. Frisch, G. W. Trucks, H. B. Schlegel, G. E. Scuseria, M. A. Robb, J. R. Cheeseman, G. Scalmani, V. Barone, G. A. Petersson, H. Nakatsuji, X. Li, M. Caricato, A. Marenich, J. Bloino, B. G. Janesko, R. Gomperts, B. Mennucci, H. P. Hratchian, J. V. Ortiz, A. F. Izmaylov, J. L. Sonnenberg, D. Williams-Young, F. Ding, F. Lipparini, F. Egidi, J. Goings, B. Peng, A. Petrone, T. Henderson, D. Ranasinghe, V. G. Zakrzewski, J. Gao, N. Rega, G. Zheng, W. Liang, M. Hada, M. Ehara, K. Toyota, R. Fukuda, J. Hasegawa, M. Ishida, T. Nakajima, Y. Honda, O. Kitao, H. Nakai, T. Vreven, K. Throssell, J. A. Montgomery, Jr., J. E. Peralta, F. Ogliaro, M. Bearpark, J. J. Heyd, E. Brothers, K. N. Kudin, V. N. Staroverov, T. Keith, R. Kobayashi, J. Normand, K. Raghavachari, A. Rendell, J. C. Burant, S. S. Iyengar, J. Tomasi, M. Cossi, J. M. Millam, M. Klene, C. Adamo, R. Cammi, J. W. Ochterski, R. L. Martin, K. Morokuma, O. Farkas, J. B. Foresman and D. J. Fox, Gaussian 09, Revision A.1. Wallingford CT, 2009.
